# Supplementary material for: Expedient C–H allylation of sulfoxonium ylides: merging C–H and C–C/C–het bond activation
Source: Royal Society of Chemistry journal article supplement (doi:10.1039/d3cc04507b), 2023-01-01

Supporting Information

**Expedient C-H allylation of sulfoxonium ylides: merging C-H and C-C/C-het bond activation**

**Table of Contents**

|    |                                                                                                         |        |
|----|---------------------------------------------------------------------------------------------------------|--------|
| 1  | General Information                                                                                     | S2     |
| 2  | Optimization Studies                                                                                    | S2-3   |
| 3  | Plausible Reaction Mechanisms for other Strained Rings                                                  | S3     |
| 4  | General Procedure for the Preparation of Sulfoxonium Ylides                                             | S3-4   |
| 5  | General Procedure for the Preparation of Vinyl Cyclopropanes, Vinyl Aziridines                          | S4-5   |
| 6  | General Procedure for the Cobalt-Catalyzed C-H activation and Ring opening of Strain rings              | S5     |
| 7  | Procedures for Scale-up and Post-Synthetic Modifications                                                | S5-6   |
| 8  | Scope of sulfoxonium ylides, 2-vinyloxirane and 2-vinylaziridines and Scale up Synthesis (Scheme S1-S2) | S7     |
| 8  | Characterization Data                                                                                   | S7-24  |
| 9  | Mechanistic Investigation                                                                               | S24-25 |
| 10 | References                                                                                              | S25-26 |
| 11 | NMR ( $^1\text{H}$ , $^{13}\text{C}$ , $^{19}\text{F}$ and NOESY) and HPLC chromatograms                | S26-74 |

**General Information.**  $\text{Co}_2(\text{CO})_8$  ( $\geq 90\%$ ),  $\text{AgSbF}_6$  (98%),  $\text{NaOPiv}$  (98%),  $\text{CsOPiv}$  ( $>98\%$ ),  $\text{NaOAc}$  (99%),  $\text{CsOAc}$  ( $>98\%$ ),  $\text{Cu}_2\text{O}$  ( $\geq 99.99\%$ ),  $\text{AgOAc}$  ( $\geq 99.99\%$ ),  $\text{Cs}_2\text{CO}_3$  ( $>98\%$ ),  $\text{CH}_3\text{COOH}$  ( $>98\%$ ),  $\text{PivOH}$  ( $>98\%$ ),  $1\text{-AdCOOH}$  ( $>98\%$ ),  $\text{MesCOOH}$  ( $>98\%$ ), 2,2,2-trifluoroethanol (TFE) and carboxylic acids were purchased from Aldrich and TCI chemicals and used as received. Acetonitrile ( $\text{CH}_3\text{CN}$ ), tetrahydrofuran (THF), MeOH and 1,2-DCE (1,2-dichloroethane) were dried prior as per the standard procedure. Silica gel-G/GF254 plates (Merck) were used for TLC analysis with a mixture of hexane and ethyl acetate as the eluent. Column chromatography was carried out using Rankem silica gel (60-120 mesh). Bruker Avance III 400, 500 and 600 MHz NMR spectrometers were used to record ( $^1\text{H}$ ,  $^{13}\text{C}$ ,  $^{19}\text{F}$  and NOESY) spectra using  $\text{CDCl}_3$  and  $\text{DMSO-d}_6$  as the solvent and tetramethylsilane (TMS) as an internal standard. Chemical shifts ( $\delta$ ) and spin-spin coupling constant ( $J$ ) are reported in parts per million and hertz (Hz), respectively, and to describe peak patterns following abbreviations were used when appropriate: s = singlet, d = doublet, t = triplet, q = quartet and m = multiplet. Melting point of the products was measured on Büchi melting point apparatus, MPB-540. Open capillary tubes were used for the measurements and are uncorrected. Mestre nova software was used throughout the spectral analysis. Q-ToF ESI-MS instrument was used for recording HRMS data. Infrared spectra were recorded on Perkin Elmer FT-IR instrument. HPLC analysis was carried out using Waters 515 system bearing C18 column with iso-propanol and hexane as an eluent.

**Table S1. Optimization of Reaction Conditions<sup>a</sup>**

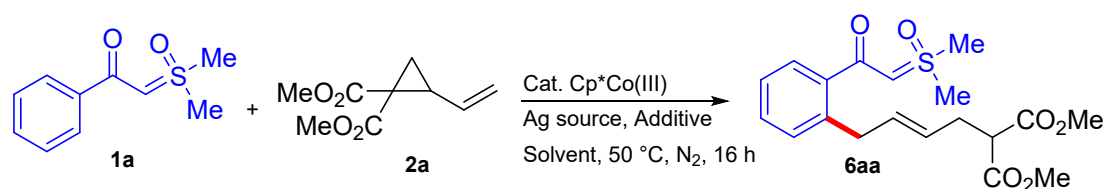

| entry    | catalyst                                                        | Ag source                          | additive                 | solvent | yield (%) <sup>b</sup> | <i>E/Z</i> <sup>c</sup> |
|----------|-----------------------------------------------------------------|------------------------------------|--------------------------|---------|------------------------|-------------------------|
| 1        | $[\text{Cp}^*\text{Co}(\text{CO})\text{I}_2]$                   | $\text{AgSbF}_6$                   | $\text{CH}_3\text{COOH}$ | 1,2-DCE | n.d.                   | -                       |
| 2        | $[\text{Cp}^*\text{Co}(\text{CO})\text{I}_2]$                   | $\text{AgSbF}_6$                   | PivOH                    | 1,2-DCE | 22                     | 9:1                     |
| <b>3</b> | <b><math>[\text{Cp}^*\text{Co}(\text{CO})\text{I}_2]</math></b> | <b><math>\text{AgSbF}_6</math></b> | -                        | 1,2-DCE | <b>88</b>              | <b>21:1</b>             |
| 4        | $[\text{Cp}^*\text{Co}(\text{CO})\text{I}_2]$                   | $\text{AgBF}_4$                    | -                        | 1,2-DCE | n.d.                   | -                       |
| 5        | $[\text{Cp}^*\text{Co}(\text{CO})\text{I}_2]$                   | $\text{AgOTf}$                     | -                        | 1,2-DCE | trace                  | -                       |
| 6        | $[\text{Cp}^*\text{Co}(\text{CO})\text{I}_2]$                   | $\text{AgOAc}$                     | -                        | 1,2-DCE | 24                     | 6:1                     |
| 7        | $[\text{Cp}^*\text{Co}(\text{CO})\text{I}_2]$                   | $\text{AgSbF}_6$                   | -                        | THF     | trace                  | -                       |

|                 |                                                      |                    |   |                    |       |      |
|-----------------|------------------------------------------------------|--------------------|---|--------------------|-------|------|
| 8               | [Cp*Co(CO)I <sub>2</sub> ]                           | AgSbF <sub>6</sub> | - | MeOH               | n.d.  | -    |
| 9               | [Cp*Co(CO)I <sub>2</sub> ]                           | AgSbF <sub>6</sub> | - | TFE                | n.d.  | -    |
| 10              | [Cp*Co(CO)I <sub>2</sub> ]                           | AgSbF <sub>6</sub> | - | CH <sub>3</sub> CN | trace | -    |
| 11 <sup>d</sup> | [Cp*Co(CO)I <sub>2</sub> ]                           | AgSbF <sub>6</sub> | - | 1,2-DCE            | 68    | 16:1 |
| 12 <sup>e</sup> | [Cp*Co(CO)I <sub>2</sub> ]                           | AgSbF <sub>6</sub> | - | 1,2-DCE            | 22    | 17:1 |
| 13 <sup>f</sup> | [Cp*Co(CO)I <sub>2</sub> ]                           | AgSbF <sub>6</sub> | - | 1,2-DCE            | trace | -    |
| 14 <sup>g</sup> | [Cp*Co(CO)I <sub>2</sub> ]                           | AgSbF <sub>6</sub> | - | 1,2-DCE            | 34    | 16:1 |
| 15              | [Cp*RhCl <sub>2</sub> ] <sub>2</sub>                 | AgSbF <sub>6</sub> | - | 1,2-DCE            | trace | -    |
| 16              | [Ru( <i>p</i> -cymene)Cl <sub>2</sub> ] <sub>2</sub> | AgSbF <sub>6</sub> | - | 1,2-DCE            | trace | -    |
| 17              | Pd(OAc) <sub>2</sub>                                 | AgSbF <sub>6</sub> | - | 1,2-DCE            | n.d.  | -    |
| 18              | Ir(ppy) <sub>3</sub>                                 | AgSbF <sub>6</sub> | - | 1,2-DCE            | n.d.  | -    |

<sup>a</sup>Reaction conditions: **1a** (0.2 mmol), **2a** (0.3 mmol), Catalyst (10 mol %), Ag source (20 mol %), additive (20 mol %), solvent (2 mL), 50 °C, 16 h, N<sub>2</sub> atmosphere. <sup>b</sup>Isolated yield. <sup>c</sup>Determined by <sup>1</sup>H NMR. <sup>d</sup>At 80 °C. <sup>e</sup>Room temperature. <sup>f</sup>Under air. <sup>g</sup>At 120 °C. n.d. = not detected. TFE = 2,2,2-trifluoroethanol.

### Plausible Reaction Pathway for Other Strain Rings

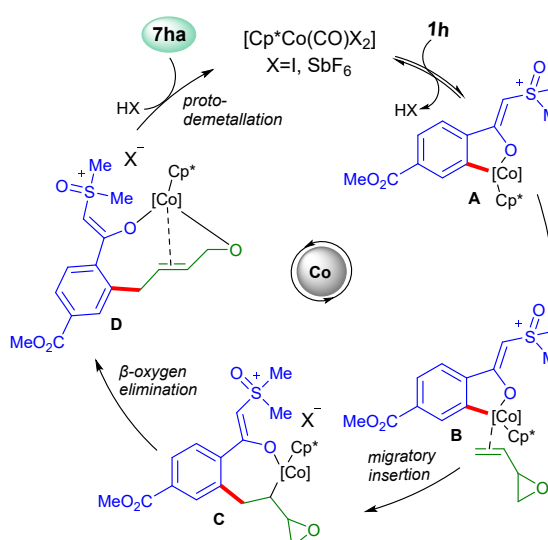

Figure 1. Mechanism when vinyl epoxide used as a coupling partner

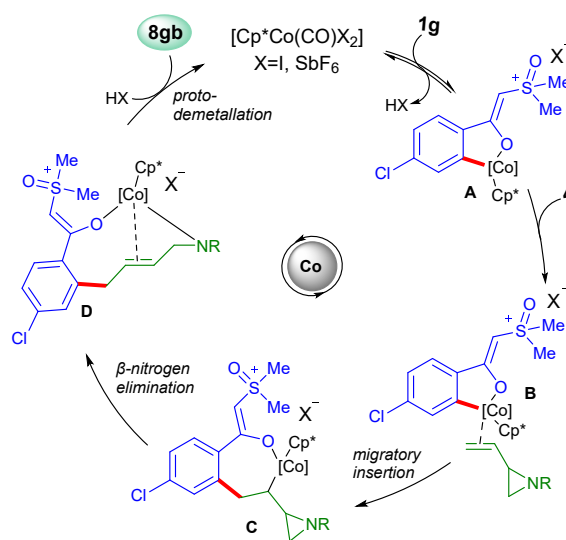

Figure 2. Mechanism when vinyl aziridine used as a coupling partner

### General Procedure for the Preparation of Sulfoxonium Ylides 1.<sup>1c</sup>

**Step-I:** To a stirred solution of a carboxylic acid (5 mmol) and DMF (2 drops) in CH<sub>2</sub>Cl<sub>2</sub> (15 mL), (COCl)<sub>2</sub> (6.5 mmol, 0.56 mL) was added dropwise. The solution was allowed to stir at

room temperature for 12 h and the resulting solution was concentrated in vacuo and dissolved in THF (10 mL). The resultant solution was used in subsequent reactions.

**Step-II:** To a stirred solution of potassium *tert*-butoxide (6.9 mmol, 774 mg) in THF (10 mL), trimethylsulfoxonium iodide (6.9 mmol, 1.5 g) was added at room temperature and the reaction was allowed to reflux for 2 h. The solution was then cooled to 0 °C followed by the dropwise addition of acid chloride (obtained in **Step-I**). The reaction was allowed to stir at room temperature for additional 3 h. After completion, 10 mL of water was added to the reaction mixture and the organic part was extracted with ethyl acetate (3 x 25 mL). The combined organic layer was washed with brine (10 mL) and water (5 mL). Drying (Na<sub>2</sub>SO<sub>4</sub>) and evaporation of the solvent gave a residue that was purified on silica gel column chromatography (ethyl acetate/methanol = 9:1) to afford sulfoxonium ylides **1a-t**.

### **General Procedure for the Preparation of Vinyl cyclopropanes 2.**

**Synthesis of 2a.**<sup>2f</sup> To a round bottom flask containing MeOH (7 mL) portion wise Na metal (10.3 mmol, 250 mg) was added at room temperature and the solution was allowed to stir till Na metal gets dissolved. The resulting solution was added dropwise to a stirred solution of (*E*)-1,4-dibromobut-2-ene (4.7 mmol, 1 g) and dimethyl malonate (5.1 mmol, 0.59 mL) in MeOH (5 mL) at room temperature under N<sub>2</sub> atmosphere. The reaction was allowed to stir for 16 h. After completion, water (20 mL) was added and the reaction mixture was extracted with ethyl acetate (3 x 20 mL). The combined organic layer was washed with brine (10 mL) and water (5 mL). Drying (Na<sub>2</sub>SO<sub>4</sub>) and evaporation of the solvent gave a residue, which was purified using silica gel column chromatography (hexane:ethyl acetate = 9:1) to afford vinyl cyclopropane **2a**.

**Synthesis of 2b-h.**<sup>2c</sup> To a stirred solution of the malonate (2.1 mmol) and (*E*)-1,4-dibromobut-2-ene (2.3 mmol, 492 mg) in THF (6 mL) was added cesium carbonate (4.2 mmol, 580 mg). The reaction was allowed to reflux for 16 h. After completion, the reaction mixture was cooled to room temperature and passed through a short pad of celite. The organic part was washed with saturated aq. NH<sub>4</sub>Cl (20 mL), extracted with ethyl acetate (3 x 15 mL) and dried over Na<sub>2</sub>SO<sub>4</sub>. Then all the volatiles were removed under reduced pressure to get a residue, which was purified using silica gel column chromatography (hexane: ethyl acetate = 4:1) to afford vinyl cyclopropanes **2b-h**.

### **General Procedure for the Preparation of Vinyl Aziridines 4.**<sup>2i</sup>

**Step-I:** To a stirred solution of sulfonamide (20 mmol, 3.42 g) and potassium hydroxide (50 mmol, 2.8 g) in MeOH (80 mL), (diacetoxyiodo)benzene (20 mmol, 6.44 g) was added portion wise at 0 °C. The resulting mixture was stirred at room temperature for 3 h and poured into

water (200 mL). The solution was kept in refrigerator overnight to precipitate a yellow solid, which was recrystallized to afford  $\text{PhI}=\text{NR}$ .

**Step-II:** To a stirred solution of  $\text{PhI}=\text{NR}$  (10 mmol, 3.37 g) and  $\text{Cu}(\text{OTf})_2$  (1 mmol, 0.36 g) in MeCN (20 mL), 1,3-butadiene (10 mmol, 0.84 mL) was added at 0 °C under  $\text{N}_2$  atmosphere. The reaction was stirred at room temperature for 3 h. After completion, the residue was poured into 1M NaOH (100 mL) and extracted with ethyl acetate (2 x 100 mL). The combined organic layer was dried over  $\text{Na}_2\text{SO}_4$  and the solvent was removed under reduced pressure. The residue was purified by silica gel flash chromatography (hexane/ethyl acetate 10:1) to afford the vinyl aziridines **4**.

**General Procedure of Cobalt-Catalyzed Ring opening of Strain Rings via Sulfoxonium Ylide 6/7/8/9.** Sulfoxonium ylide **1** (0.2 mmol), vinyl cyclopropane **2** (0.3 mmol)/2-vinylloxirane **3** (0.3 mmol)/2-vinylaziridines **4** (0.3 mmol)/4-vinyl-1,3-dioxolan-2-one **5** (0.3 mmol),  $[\text{Cp}^*\text{Co}(\text{CO})\text{I}_2]$  (10 mol %, 0.02 mmol, 10 mg) and  $\text{AgSbF}_6$  (20 mol %, 0.04 mmol, 13 mg) were stirred in 1,2-DCE (2 mL) at 50 °C under  $\text{N}_2$  atmosphere in a preheated oil bath for 16 h. After completion (monitored by TLC), the reaction mixture was cooled to room temperature, diluted with ethyl acetate (10 mL) and filtered through a short pad of celite. Evaporation of the solvent gave a residue, which was purified using silica gel chromatography (hexane: ethyl acetate =1:4) to afford the ring opening allylated products **6/7/8/9**.

**Scale-up Synthesis of 6aa.** 2-(Dimethyl(oxo)-16-sulfaneylidene)-1-phenylethan-1-one **1a** (5 mmol, 1 g), 1-dimethyl 2-vinylcyclopropane-1,1-dicarboxylate **2a** (7.5 mmol, 1.4 g),  $[\text{Cp}^*\text{Co}(\text{CO})\text{I}_2]$  (10 mol %, 0.5 mmol, 242 mg) and  $\text{AgSbF}_6$  (20 mol %, 1 mmol, 350 mg) were stirred in 1,2-DCE (100 mL) at 50 °C under  $\text{N}_2$  atmosphere in a preheated oil bath for 16 h. After completion (monitored by TLC), the reaction mixture was cooled to room temperature, diluted with ethyl acetate (60 mL) and filtered through a celite pad. Evaporation of the solvent gave a residue, which was purified using silica gel chromatography (hexane: ethyl acetate =2:8) to afford the ring opening allylated product **6aa** in 72% (1.4 g) yield.

### Procedures for the Post-Synthetic Modifications

**Synthesis of 10.**<sup>3a</sup> To a stirred solution of  $\text{CS}_2$  (2.5 M in THF, 0.3 mmol, 0.12 mL) and benzyl amine (0.2 mmol, 22.5 mg) in water (0.7 mL), dimethyl (*E*)-2-(4-(2-(2-(dimethyl(oxo)-16-sulfaneylidene)acetyl)phenyl)but-2-en-1-yl)malonate **6aa** (0.1 mmol, 40 mg) was added and the reaction mixture was stirred at room temperature for 10 h. After completion (monitored by TLC), it was extracted with ethyl acetate (3 x 10 mL). Drying ( $\text{Na}_2\text{SO}_4$ ) and evaporation of the solvent gave a residue, which was purified using silica gel chromatography (hexane/ethyl acetate = 9:1) to afford **10** in 57% (19 mg) yield.

**Synthesis of 11.**<sup>3b</sup> To a stirred solution of **6da** (0.1 mmol, 50 mg) in MeOH (2 mL) was added MeONa (0.3 mmol, 17.5 mg) and  $\text{PhI}(\text{OAc})_2$  (0.1 mmol, 32.5 mg) and the mixture was stirred at 80 °C for 12 h under  $\text{N}_2$  atmosphere. After completion (monitored by TLC), all the volatiles were evaporated using rotary evaporator to give a residue, which was purified using silica gel chromatography (hexane/ethyl acetate = 7:3) to afford **11** in 82% (40 mg) yield.

**Synthesis of 13.**<sup>3c</sup> To a stirred solution of **6ab** (0.1 mmol, 50 mg) in HFIP (2 mL),  $[\text{Ru}(p\text{-cymene})\text{Cl}_2]_2$  (0.03 mmol, 4 mg) and cyclopropanol **12** (0.12 mmol, 25 mg) were added and the reaction was allowed to stir at room temperature for 16 h. After completion (monitored by TLC), all the volatiles were evaporated using rotary evaporator. The resulting residue was purified using silica gel chromatography (hexane/ethyl acetate = 9:1) to afford **13** in 81% (26 mg) yield.

**Synthesis of 14.** To a stirred solution of **11** (0.1 mmol, 35 mg) in MeOH (1 mL) was added 2M NaOH solution (0.25 mmol, 0.15 mL) at 0 °C and the mixture was stirred at room temperature for 4 h. After completion (monitored by TLC), all the volatiles were evaporated using rotary evaporator. The resulting residue was added 1M HCl solution and white solid compound was formed, which was filtered through sintered funnel and the filtrate was washed with water (10 mL) to afford **14** in 80% (35 mg) yield.

**Synthesis of 15.** Compound **11** (0.1 mmol, 35 mg) and LiCl (0.5 mmol, 21 mg) were stirred in DMSO (1 mL) and  $\text{H}_2\text{O}$  (0.5 mmol, 10  $\mu\text{L}$ ) for 12 h at 150 °C under  $\text{N}_2$  atmosphere. After completion (monitored by TLC), it was extracted with ethyl acetate (3 x 10 mL). Drying ( $\text{Na}_2\text{SO}_4$ ) and evaporation of the solvent gave a residue, which was purified using silica gel chromatography (hexane/ethyl acetate = 9:1) to afford **15** as a sticky liquid in 85% (17 mg) yield.

**Synthesis of 16.** Compound **11** (0.1 mmol, 35 mg) and Pd/C (10 mol%, 12 mg) were stirred in MeOH (1 mL) under  $\text{H}_2$  balloon for 2 h at room temperature. After completion (monitored by TLC), the reaction mixture was passed through a short Celite pad using ethyl acetate (10 mL). The volatile was evaporated using rotary evaporator and the resulting residue was purified using silica gel chromatography (hexane/ethyl acetate = 9:1) to afford **16** as a colorless liquid in 90% (15 mg) yield.

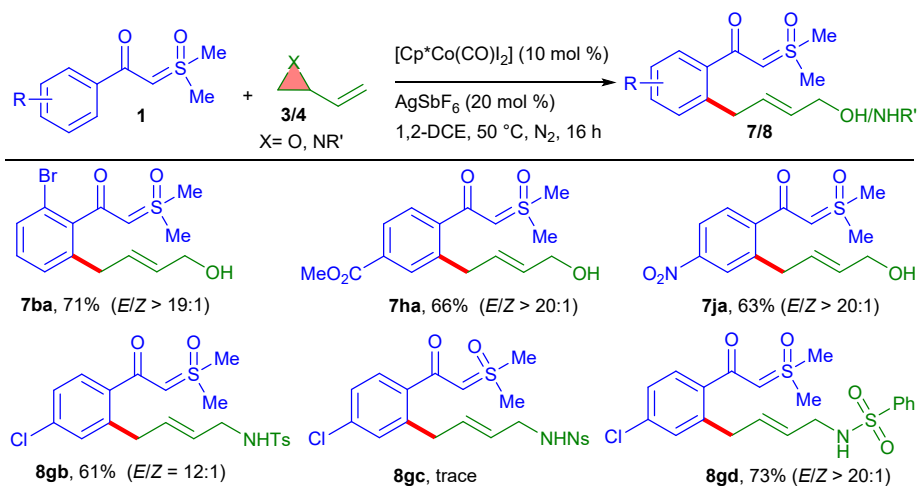

**Scheme S1** Scope of sulfoxonium ylides, 2-vinyl oxirane and 2-vinylaziridines.<sup>a,b</sup> <sup>a</sup>Reaction conditions: **1** (0.2 mmol), **3/4** (0.3 mmol),  $[\text{Cp}^*\text{Co}(\text{CO})\text{I}_2]$  (10 mol %),  $\text{AgSbF}_6$  (20 mol %), 1,2-dichloroethane (2 mL),  $\text{N}_2$ , 50 °C, 16 h. <sup>b</sup>Isolated yield.

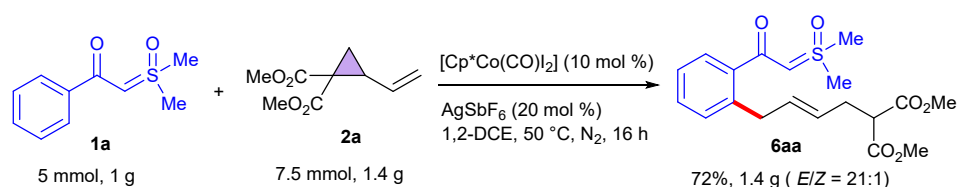

**Scheme S2.** Scale-up synthesis.

### Characterization Data of the Products

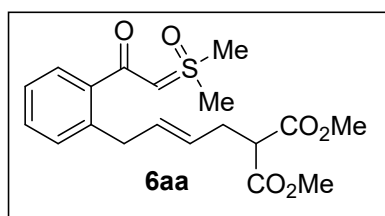

**Dimethyl (*E*)-2-(4-(2-(2-(dimethyl(oxo)-16-sulfaneylidene)-acetyl)phenyl)but-2-en-1-yl)malonate **6aa**.** Analytical TLC on silica gel, 9:1 ethyl acetate/hexane  $R_f = 0.28$ ; brown liquid; yield 88% (89 mg); major diastereomer ( $E/Z > 21:1$ );  $^1\text{H}$  NMR (600 MHz,  $\text{CDCl}_3$ )  $\delta$  7.39 (d,  $J = 7.2$  Hz, 1H), 7.29-7.26 (m, 1H), 7.19-7.16 (m, 2H), 5.71-5.66 (m, 1H), 5.41-5.36 (m, 1H), 4.67 (bs, 1H), 3.72 (s, 6H), 3.67 (s, 0.29H, minor), 3.65-3.63 (m, 2H), 3.53 (s, 6H), 3.45 (t,  $J = 7.8$  Hz, 1H), 2.75 (t,  $J = 7.2$  Hz, 2H);  $^{13}\text{C}$  NMR (150 MHz,  $\text{CDCl}_3$ )  $\delta$  186.8, 169.6, 132.2, 129.9, 129.4, 127.7, 126.0, 125.2, 71.8, 52.7, 51.7, 42.3, 31.0, 27.0; FT-IR (neat) 3025, 1723, 1542, 1382, 1328, 1255, 1121  $\text{cm}^{-1}$ ; HRMS (ESI-TOF)  $m/z$   $[\text{M}+\text{H}]^+$  calcd for  $\text{C}_{19}\text{H}_{25}\text{O}_6\text{S}$ : 381.1366; Found 381.1373.

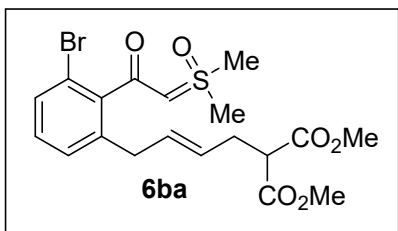

**Dimethyl (E)-2-(4-(3-bromo-2-(2-(dimethyl(oxo)-16-**

**sulfaneylidene)acetyl)phenyl)but-2-en-1-yl)malonate 6ba.** Analytical TLC on silica gel, 9:1 ethyl acetate/hexane  $R_f = 0.25$ ; brown liquid; yield 84% (70 mg); major diastereomer ( $E/Z > 21:1$ );  $^1\text{H NMR}$  (500 MHz,  $\text{CDCl}_3$ )  $\delta$  7.36 (d,  $J = 7.5$  Hz, 1H), 7.13-7.07 (m, 2H), 5.71-5.66 (m, 1H), 5.44-5.39 (m, 1H), 4.55 (s, 1H), 3.72 (s, 6H), 3.65 (s, 0.18H, minor), 3.57 (s, 6H), 3.52 (d,  $J = 7.0$  Hz, 2H), 3.44 (t,  $J = 7.5$  Hz, 1H), 2.74 (t,  $J = 7.5$  Hz, 2H);  $^{13}\text{C NMR}$  (125 MHz,  $\text{CDCl}_3$ )  $\delta$  184.2, 169.5, 142.8, 139.1, 131.3, 130.4, 129.3, 127.9, 125.9, 120.0, 72.7, 52.7, 51.6, 42.2, 31.1, 27.1; FT-IR (neat) 3009, 1720, 1536, 1375, 1321, 1240, 1128  $\text{cm}^{-1}$ ; HRMS (ESI-TOF)  $m/z$   $[\text{M}+\text{H}]^+$  calcd for  $\text{C}_{19}\text{H}_{24}\text{BrO}_6\text{S}$ : 459.0471; Found 459.0464.

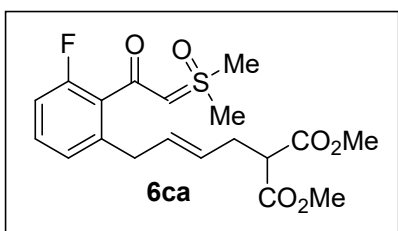

**Dimethyl (E)-2-(4-(2-(2-(dimethyl(oxo)-16-sulfaneyli-**

**dene)acetyl)-3-fluorophenyl)but-2-en-1-yl)malonate 6ca.** Analytical TLC on silica gel, 9:1 ethyl acetate/hexane  $R_f = 0.26$ ; brown sticky liquid; yield 86% (80 mg); major diastereomer ( $E/Z = 15:1$ );  $^1\text{H NMR}$  (500 MHz,  $\text{CDCl}_3$ )  $\delta$  7.20-7.16 (m, 1H), 6.96-6.93 (m, 1H), 6.88 (t,  $J = 8.5$  Hz, 1H), 5.71-5.66 (m, 1H), 5.43-5.38 (m, 1H), 4.64 (s, 1H), 3.72 (s, 6H), 3.68 (s, 0.40H, minor), 3.55-3.53 (m, 8H), 3.44 (t,  $J = 7.5$  Hz, 1H), 2.74 (t,  $J = 7.5$  Hz, 2H);  $^{13}\text{C NMR}$  (150 MHz,  $\text{CDCl}_3$ )  $\delta$  180.8, 169.6, 159.9 ( $J_{\text{C-F}} = 244.1$  Hz), 140.2 ( $J_{\text{C-F}} = 3.3$  Hz), 131.4, 130.0 ( $J_{\text{C-F}} = 18.2$  Hz), 129.5 ( $J_{\text{C-F}} = 8.6$  Hz), 125.7, 124.7 ( $J_{\text{C-F}} = 2.9$  Hz), 113.4 ( $J_{\text{C-F}} = 22.5$  Hz), 73.9, 52.7, 51.6, 42.4, 30.5, 27.0;  $^{19}\text{F NMR}$  (470 MHz,  $\text{CDCl}_3$ )  $\delta$  -116.97; FT-IR (neat) 3007, 1722, 1574, 1436, 1252, 1150, 1128  $\text{cm}^{-1}$ ; HRMS (ESI-TOF)  $m/z$   $[\text{M}+\text{H}]^+$  calcd for  $\text{C}_{19}\text{H}_{25}\text{FO}_6\text{S}$ : 399.1272; Found 399.1275.

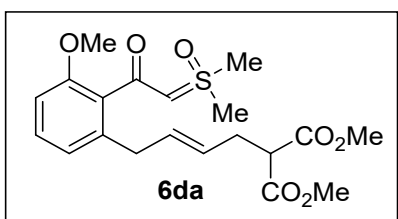

**Dimethyl (E)-2-(4-(2-(2-(dimethyl(oxo)-16-sulfaneylidene)-**

**acetyl)-3-methoxyphenyl)but-2-en-1-yl)malonate 6da.** Analytical TLC on silica gel, 8:2 ethyl acetate/hexane  $R_f = 0.27$ ; yellow sticky liquid; yield 83% (75 mg); major diastereomer



(*E/Z* = 15:1); <sup>1</sup>H NMR (400 MHz, CDCl<sub>3</sub>) δ 7.18 (t, *J* = 8.0 Hz, 1H), 6.78-6.72 (m, 2H), 5.74-5.67 (m, 1H), 5.42-5.35 (m, 1H), 4.57 (bs, 1H), 3.79 (s, 3H), 3.72 (s, 6H), 3.69 (s, 0.40H, minor), 3.55-3.53 (m, 6H), 3.48-3.46 (m, 2H), 3.44-3.42 (m, 1H), 2.74 (t, *J* = 7.2 Hz, 2H); <sup>13</sup>C NMR (150 MHz, CDCl<sub>3</sub>) δ 184.6, 169.6, 156.1, 138.4, 132.0, 131.9, 128.9, 125.2, 121.2, 108.9, 72.9, 56.0, 52.7, 51.7, 42.5, 30.5, 27.1; FT-IR (neat) 2957, 1731, 1673, 1438, 1345, 1283, 1257, 1153, 1022 cm<sup>-1</sup>; HRMS (ESI-TOF) *m/z* [M+H]<sup>+</sup> calcd for C<sub>20</sub>H<sub>27</sub>O<sub>7</sub>S: 411.1472; Found 411.1476.

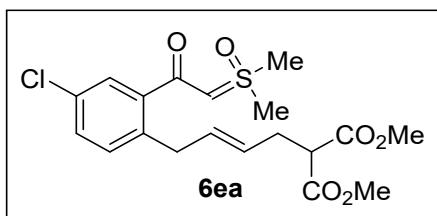

**Dimethyl (E)-2-(4-(4-chloro-2-(2-(dimethyl(oxo)-16-sulfaneylidene)acetyl)phenyl)but-2-en-1-yl)malonate 6ea.** Analytical TLC on silica gel, 8:2 ethyl acetate/hexane *R<sub>f</sub>* = 0.27; yellow sticky liquid; yield 72% (65 mg); major diastereomer (*E/Z* > 21:1); <sup>1</sup>H NMR (600 MHz, CDCl<sub>3</sub>) δ 7.37 (s, 1H), 7.24-7.22 (m, 1H), 7.11 (d, *J* = 8.4 Hz, 1H), 5.66-5.62 (m, 1H), 5.41-5.37 (m, 1H), 4.65 (bs, 1H), 3.72 (s, 6H), 3.69 (s, 0.30H, minor), 3.58 (d, *J* = 7.8 Hz, 2H), 3.53 (s, 6H), 3.44 (t, *J* = 7.8 Hz, 1H), 2.73 (t, *J* = 7.2 Hz, 2H); <sup>13</sup>C NMR (150 MHz, CDCl<sub>3</sub>) δ 185.0, 169.6, 137.6, 136.7, 131.7, 131.6, 131.2, 129.2, 127.6, 125.6, 72.2, 52.7, 51.7, 42.3, 30.4, 27.1; FT-IR (neat) 2973, 1718, 1573, 1385, 1283, 1121, 1084 cm<sup>-1</sup>; HRMS (ESI-TOF) *m/z* [M+H]<sup>+</sup> calcd for C<sub>19</sub>H<sub>24</sub>ClO<sub>6</sub>S: 415.0977; Found 415.0978.

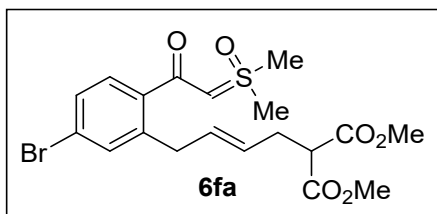

**Dimethyl (E)-2-(4-(5-bromo-2-(2-(dimethyl(oxo)-16-sulfaneylidene)acetyl)phenyl)but-2-en-1-yl)malonate 6fa.** Analytical TLC on silica gel, 8:2 ethyl acetate/hexane *R<sub>f</sub>* = 0.27; brown sticky liquid; yield 83% (75 mg); major diastereomer (*E/Z* > 23:1); <sup>1</sup>H NMR (600 MHz, CDCl<sub>3</sub>) δ 7.32-7.29 (m, 2H), 7.27-7.25 (m, 1H), 5.66-5.62 (m, 1H), 5.44-5.40 (m, 1H), 4.64 (s, 1H), 3.73 (s, 6H), 3.69 (s, 0.20H, minor), 3.60 (d, *J* = 7.2 Hz, 2H), 3.53 (s, 6H), 3.45 (t, *J* = 7.8 Hz, 1H), 2.74 (t, *J* = 7.2 Hz, 2H); <sup>13</sup>C NMR (150 MHz, CDCl<sub>3</sub>) δ 185.5, 169.6, 140.5, 139.9, 132.6, 131.3, 129.2, 129.0, 125.9, 123.3, 72.1, 52.8, 51.6, 42.2, 30.7, 27.0; FT-IR (neat) 3013, 1729, 1543, 1385, 1328, 1256, 1165, 1023 cm<sup>-1</sup>; HRMS (ESI-TOF) *m/z* [M+H]<sup>+</sup> calcd for C<sub>19</sub>H<sub>24</sub>BrO<sub>6</sub>S: 459.0471; Found 459.0470.

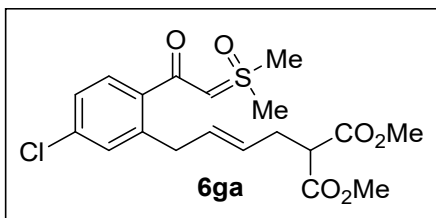

**Dimethyl (E)-2-(4-(5-chloro-2-(2-(dimethyl(oxo)-l6-sulfaneylidene)acetyl)phenyl)but-2-en-1-yl)malonate 6ga.** Analytical TLC on silica gel, 8:2 ethyl acetate/hexane  $R_f = 0.27$ ; yellow sticky liquid; yield 79% (80 mg); major diastereomer ( $E/Z > 23:1$ ) mixture of diastereomers;  $^1\text{H NMR}$  (500 MHz,  $\text{CDCl}_3$ )  $\delta$  7.32 (d,  $J = 8.0$  Hz, 1H), 7.16-7.14 (m, 2H), 5.68-5.63 (m, 1H), 5.45-5.40 (m, 1H), 4.63 (bs, 1H), 3.73 (s, 6H), 3.70 (s, 0.27H, minor), 3.62 (d,  $J = 7.5$  Hz, 2H), 3.52-3.51 (m, 6H), 3.47-3.44 (m, 1H), 2.74 (t,  $J = 7.0$  Hz, 2H);  $^{13}\text{C NMR}$  (150 MHz,  $\text{CDCl}_3$ )  $\delta$  185.6, 169.6, 140.3, 139.5, 135.0, 131.4, 129.8, 129.0, 126.0, 125.9, 72.1, 52.7, 51.6, 42.4, 30.8, 27.0; FT-IR (neat) 2953, 1722, 1673, 1438, 1345, 1283, 1257, 1159, 1067  $\text{cm}^{-1}$ ; HRMS (ESI-TOF)  $m/z$   $[\text{M}+\text{H}]^+$  calcd for  $\text{C}_{19}\text{H}_{24}\text{ClO}_6\text{S}$ : 415.0977; Found 415.0967.

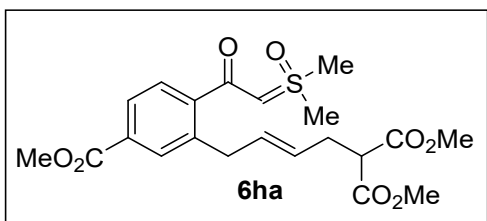

**Dimethyl (E)-2-(4-(2-(2-(dimethyl(oxo)-l6-sulfaneylidene)acetyl)-5-(methoxycarbonyl)phenyl)but-2-en-1-yl)malonate 6ha.** Analytical TLC on silica gel, 9:1 ethyl acetate/hexane  $R_f = 0.27$ ; yellow sticky liquid; yield 87% (75 mg); major diastereomer ( $E/Z > 23:1$ );  $^1\text{H NMR}$  (500 MHz,  $\text{CDCl}_3$ )  $\delta$  7.85-7.83 (m, 2H), 7.43 (d,  $J = 8.0$  Hz, 1H), 5.71-5.66 (m, 1H), 5.45-5.40 (m, 1H), 4.67 (bs, 1H), 3.90 (s, 3H), 3.73 (s, 6H), 3.68-3.66 (m, 2H), 3.55 (s, 6H), 3.46 (t,  $J = 7.5$  Hz, 1H), 2.76 (t,  $J = 7.5$  Hz, 2H);  $^{13}\text{C NMR}$  (150 MHz,  $\text{CDCl}_3$ )  $\delta$  185.7, 169.6, 166.9, 145.5, 138.5, 131.6, 131.0, 130.6, 127.6, 127.3, 125.8, 72.3, 52.7, 52.3, 51.7, 42.4, 30.8, 27.1; FT-IR (neat) 3012, 1733, 1728, 1381, 1243, 1221, 1159, 1033  $\text{cm}^{-1}$ ; HRMS (ESI-TOF)  $m/z$   $[\text{M}+\text{H}]^+$  calcd for  $\text{C}_{21}\text{H}_{27}\text{O}_8\text{S}$ : 439.1421; Found 439.1419.

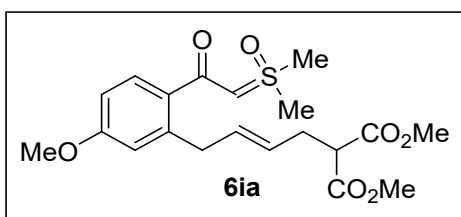

**Dimethyl (E)-2-(4-(2-(2-(dimethyl(oxo)-l6-sulfaneylidene)acetyl)-5-methoxyphenyl)but-2-en-1-yl)malonate 6ia.** Analytical TLC on silica gel, 9:1 ethyl acetate/hexane  $R_f = 0.27$ ; brown liquid; yield 82% (73 mg); major diastereomer ( $E/Z$

> 20:1); <sup>1</sup>H NMR (400 MHz, CDCl<sub>3</sub>) δ 7.38 (d, *J* = 8.4 Hz, 1H), 6.73-6.72 (m, 1H), 6.70-6.67 (m, 1H), 5.71-5.64 (m, 1H), 5.42-5.36 (m, 1H), 4.63 (bs, 1H), 3.80 (s, 3H), 3.72 (s, 6H), 3.68-3.66 (m, 2H), 3.50 (s, 6H), 3.45 (t, *J* = 8.0 Hz, 1H), 2.75 (t, *J* = 7.6 Hz, 2H); <sup>13</sup>C NMR (150 MHz, CDCl<sub>3</sub>) δ 186.5, 169.6, 160.4, 140.6, 133.6, 132.2, 129.5, 125.2, 115.5, 110.9, 71.0, 55.4, 52.7, 51.8, 42.5, 31.3, 27.0; FT-IR (neat) 2956, 1733, 1431, 1345, 1270, 1257, 1153, 1012 cm<sup>-1</sup>; HRMS (ESI-TOF) *m/z* [M+H]<sup>+</sup> calcd for C<sub>20</sub>H<sub>27</sub>O<sub>7</sub>S: 411.1472; Found 411.1476.

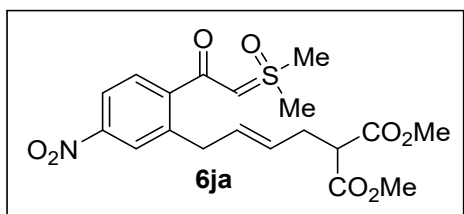

**Dimethyl (E)-2-(4-(2-(2-(dimethyl(oxo)-16-sulfaneyli-**

**dene)acetyl)-5-nitrophenyl)but-2-en-1-yl)malonate 6ja.** Analytical TLC on silica gel, 8:2 ethyl acetate/hexane *R<sub>f</sub>* = 0.27; yellow sticky liquid; yield 78% (75 mg); major diastereomer (*E/Z* = 6:1); <sup>1</sup>H NMR (400 MHz, CDCl<sub>3</sub>) δ 8.06-8.02 (m, 2H, major + minor), 7.54-7.50 (m, 1H, major + minor), 5.72-5.65 (m, 1H, major + minor), 5.53-5.46 (m, 1H, major + minor), 4.68-4.67 (m, 1H, major + minor), 3.74 (m, 6H, major), 3.73 (m, 1H, minor), 3.71-3.70 (m, 2H, major + minor), 3.56 (s, 6H, major), 3.55 (s, 1H, minor), 3.47 (t, *J* = 7.6 Hz, 1H, major + minor), 2.75 (t, *J* = 7.2 Hz, 2H, major + minor); <sup>13</sup>C NMR (100 MHz, CDCl<sub>3</sub>) δ 184.1 (major + minor), 171.7 (minor) 169.5 (major), 148.1 (major + minor), 147.2 (major + minor), 140.2 (major + minor), 130.6 (minor), 130.5 (major), 129.9 (minor), 128.5 (minor), 128.3 (major), 126.9 (major), 125.0 (minor), 124.7 (major), 121.5 (minor), 121.2 (major), 73.0 (minor), 72.9 (major), 53.0 (minor), 52.8 (major), 51.5 (major + minor), 42.3 (major), 42.2 (minor), 30.7 (major + minor), 27.1 (major + minor); FT-IR (neat) 2980, 1722, 1675, 1438, 1330, 1283, 1252, 1160, 1068 cm<sup>-1</sup>; HRMS (ESI-TOF) *m/z* [M+H]<sup>+</sup> calcd for C<sub>19</sub>H<sub>24</sub>NO<sub>8</sub>S: 426.1217; Found 426.1223.

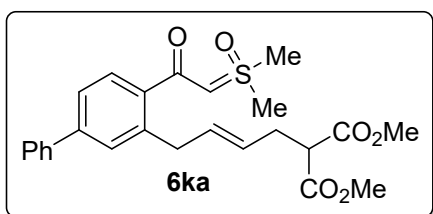

**Dimethyl (E)-2-(4-(4-(2-(2-(dimethyl(oxo)-16-sulfaneyli-**

**dene)acetyl)-[1,1'-biphenyl]-3-yl)but-2-en-1-yl)malonate 6ka.** Analytical TLC on silica gel, 8:2 ethyl acetate/hexane *R<sub>f</sub>* = 0.32; brown sticky liquid; yield 84% (70 mg); major diastereomer (*E/Z* = 17:1); <sup>1</sup>H NMR (600 MHz, CDCl<sub>3</sub>) δ 7.59 (d, *J* = 7.2 Hz, 2H), 7.48 (d, *J* = 7.8 Hz, 1H), 7.44-7.40 (m, 4H), 7.34 (t, *J* = 7.8 Hz, 1H), 5.76-5.71 (m, 1H), 5.43-5.39 (m, 1H), 4.71 (s, 1H), 3.73-3.70 (m, 8H), 3.63 (s, 0.36H, minor), 3.55 (s, 6H), 3.46 (t, *J* = 7.8 Hz, 1H), 2.79 (t, *J* =

7.2 Hz, 2H);  $^{13}\text{C}$  NMR (150 MHz,  $\text{CDCl}_3$ )  $\delta$  186.5, 169.6, 142.1, 140.7, 139.8, 138.8, 132.3, 128.9, 128.7, 128.2, 127.6, 127.3, 125.2, 124.6, 71.7, 52.7, 51.7, 42.3, 31.1, 27.0; FT-IR (neat) 3031, 1730, 1438, 1345, 1281, 1260, 1155, 1020  $\text{cm}^{-1}$ ; HRMS (ESI-TOF)  $m/z$   $[\text{M}+\text{H}]^+$  calcd for  $\text{C}_{25}\text{H}_{29}\text{O}_6\text{S}$ : 457.1679; Found 457.1671.

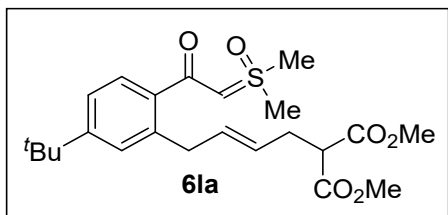

**Dimethyl (*E*)-2-(4-(5-(*tert*-butyl)-2-(2-(dimethyl(oxo)-16-sulfaneylidene)acetyl)phenyl)but-2-en-1-yl)malonate 6la.** Analytical TLC on silica gel, 8:2 ethyl acetate/hexane  $R_f = 0.27$ ; yellow sticky liquid; yield 88% (79 mg); major diastereomer ( $E/Z > 22:1$ );  $^1\text{H}$  NMR (500 MHz,  $\text{CDCl}_3$ )  $\delta$  7.34 (d,  $J = 7.5$  Hz, 1H), 7.20-7.18 (m, 2H), 5.72-5.67 (m, 1H), 5.40-5.35 (m, 1H), 4.64 (bs, 1H), 3.73 (s, 6H), 3.65 (d,  $J = 7.5$  Hz, 2H), 3.53-3.51 (m, 6H), 3.47-3.44 (m, 1H), 2.77 (t,  $J = 7.0$  Hz, 2H), 1.29 (s, 9H);  $^{13}\text{C}$  NMR (125 MHz,  $\text{CDCl}_3$ )  $\delta$  186.9, 169.6, 152.5, 138.2, 137.9, 132.7, 127.6, 127.0, 124.8, 122.8, 71.2, 52.7, 51.8, 42.4, 34.8, 31.4, 31.2, 27.1; FT-IR (neat) 2956, 1733, 1673, 1438, 1283, 1257, 1153, 1022  $\text{cm}^{-1}$ ; HRMS (ESI-TOF)  $m/z$   $[\text{M}+\text{H}]^+$  calcd for  $\text{C}_{23}\text{H}_{33}\text{O}_6\text{S}$ : 437.1992; Found 437.1995.

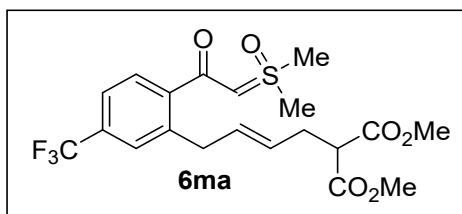

**Dimethyl (*E*)-2-(4-(2-(2-(dimethyl(oxo)-16-sulfaneylidene)acetyl)-5-(trifluoromethyl)phenyl)but-2-en-1-yl)malonate 6ma.** Analytical TLC on silica gel, 9:1 ethyl acetate/hexane  $R_f = 0.27$ ; yellow liquid; yield 81% (73 mg); major diastereomer ( $E/Z > 17:1$ );  $^1\text{H}$  NMR (600 MHz,  $\text{CDCl}_3$ )  $\delta$  7.47 (d,  $J = 7.8$  Hz, 1H), 7.45-7.43 (m, 2H), 5.70-5.65 (m, 1H), 5.47-5.42 (m, 1H), 4.65 (s, 1H), 3.73 (s, 6H), 3.72 (s, 0.26H, minor), 3.67 (d,  $J = 7.8$  Hz, 2H), 3.55 (s, 6H), 3.45 (t,  $J = 7.2$  Hz, 1H), 2.75 (t,  $J = 7.2$  Hz, 2H);  $^{13}\text{C}$  NMR (150 MHz,  $\text{CDCl}_3$ )  $\delta$  185.2, 169.6, 144.6, 139.1, 131.2, 131.1 ( $J_{\text{C-F}} = 35.3$  Hz), 127.83 ( $J_{\text{C-F}} = 245.1$  Hz), 127.81, 126.6 ( $J_{\text{C-F}} = 3.8$  Hz), 126.2, 122.9 ( $J_{\text{C-F}} = 3.9$  Hz), 72.3, 52.7, 51.6, 42.4, 30.8, 27.1;  $^{19}\text{F}$  NMR (377 MHz,  $\text{CDCl}_3$ )  $\delta$  -62.62; FT-IR (neat) 2957, 1722, 1437, 1280, 1240, 1152, 1029  $\text{cm}^{-1}$ ; HRMS (ESI-TOF)  $m/z$   $[\text{M}+\text{H}]^+$  calcd for  $\text{C}_{20}\text{H}_{24}\text{F}_3\text{O}_6\text{S}$ : 449.1240; Found 449.1233.

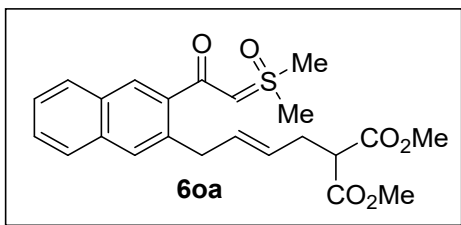

**Dimethyl (E)-2-(4-(3-(2-(dimethyl(oxo)-16-sulfaneylidene)acetyl)naphthalen-2-yl)but-2-en-1-yl)malonate 60a.** Analytical TLC on silica gel, 8:2 ethyl acetate/hexane  $R_f = 0.27$ ; yellow sticky liquid; yield 86% (76 mg); major diastereomer ( $E/Z > 23:1$ );  $^1\text{H NMR}$  (400 MHz,  $\text{CDCl}_3$ )  $\delta$  7.91 (s, 1H), 7.80-7.74 (m, 2H), 7.62 (s, 1H), 7.48-7.40 (m, 2H), 5.81-5.75 (m, 1H), 5.49-5.42 (m, 1H), 4.81 (bs, 1H), 3.79 (d,  $J = 7.2$  Hz, 2H), 3.72 (s, 6H), 3.56 (s, 6H), 3.47 (t,  $J = 8.0$  Hz, 1H), 2.80 (t,  $J = 7.2$  Hz, 2H);  $^{13}\text{C NMR}$  (150 MHz,  $\text{CDCl}_3$ )  $\delta$  186.8, 169.6, 136.0, 133.9, 132.1, 131.6, 128.1, 128.0, 127.3, 127.2, 126.83, 126.82, 125.9, 125.5, 71.9, 52.7, 51.8, 42.4, 31.2, 27.1; FT-IR (neat) 2953, 1727, 1438, 1351, 1288, 1259, 1187, 1067  $\text{cm}^{-1}$ ; HRMS (ESI-TOF)  $m/z$   $[\text{M}+\text{H}]^+$  calcd for  $\text{C}_{23}\text{H}_{27}\text{O}_6\text{S}$ : 431.1523; Found 431.1516.

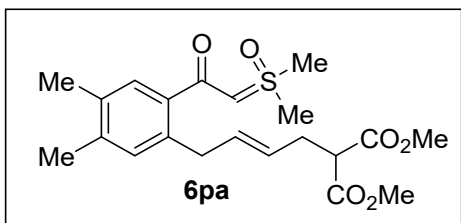

**Dimethyl (E)-2-(4-(2-(2-(dimethyl(oxo)-16-sulfaneylidene)acetyl)-4,5-dimethylphenyl)but-2-en-1-yl)malonate 6pa.** Analytical TLC on silica gel, 8:2 ethyl acetate/hexane  $R_f = 0.27$ ; brown sticky liquid; yield 84% (80 mg); major diastereomer ( $E/Z = 19:1$ );  $^1\text{H NMR}$  (500 MHz,  $\text{CDCl}_3$ )  $\delta$  7.19 (s, 1H), 6.94 (s, 1H), 5.69-5.64 (m, 1H), 5.38-5.33 (m, 1H), 4.62 (bs, 1H), 3.73 (s, 6H), 3.69 (s, 0.31H, minor), 3.58 (d,  $J = 7.5$  Hz, 2H), 3.51 (s, 6H), 3.45 (t,  $J = 7.5$  Hz, 1H), 2.76 (t,  $J = 7.5$  Hz, 2H), 2.21 (d,  $J = 5.5$  Hz, 6H);  $^{13}\text{C NMR}$  (125 MHz,  $\text{CDCl}_3$ )  $\delta$  187.0, 169.6, 138.6, 137.9, 135.5, 134.0, 132.8, 131.2, 129.0, 124.7, 71.1, 52.6, 51.8, 42.4, 30.6, 27.0, 19.7, 19.3; FT-IR (neat) 2987, 1731, 1441, 1355, 1285, 1237, 1153, 1065  $\text{cm}^{-1}$ ; HRMS (ESI-TOF)  $m/z$   $[\text{M}+\text{H}]^+$  calcd for  $\text{C}_{21}\text{H}_{29}\text{O}_6\text{S}$ : 409.1679; Found 409.1679.

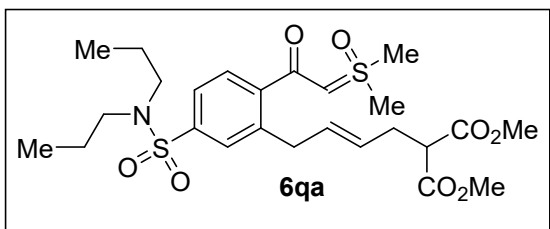

**Dimethyl (E)-2-(4-(2-(2-(dimethyl(oxo)-16-sulfaneylidene)acetyl)-5-(N,N-dipropylsulfamoyl)phenyl)but-2-en-1-yl)malonate 6qa.** Analytical TLC on silica gel, 8:2 ethyl acetate/hexane  $R_f = 0.28$ ; brown liquid; yield 80% (63 mg); major diastereomer ( $E/Z > 21:1$ );  $^1\text{H NMR}$  (400 MHz,  $\text{CDCl}_3$ )  $\delta$  7.61-7.59 (m, 2H), 7.47

(d,  $J = 8.0$  Hz, 1H), 5.68-5.62 (m, 1H), 5.46-5.40 (m, 1H), 4.68 (s, 1H), 3.74 (s, 6H), 3.69-3.67 (m, 2H), 3.55 (s, 6H), 3.45 (t,  $J = 7.6$  Hz, 1H), 3.07-3.03 (m, 4H), 2.73 (t,  $J = 7.2$  Hz, 2H), 1.59-1.49 (m, 4H), 0.87 (t,  $J = 7.2$  Hz, 6H);  $^{13}\text{C}$  NMR (100 MHz,  $\text{CDCl}_3$ )  $\delta$  185.0, 169.6, 144.9, 140.4, 139.5, 131.1, 128.2, 128.1, 126.3, 124.7, 72.6, 52.8, 51.5, 50.2, 42.3, 30.8, 29.8, 27.1, 22.2, 11.3; FT-IR (neat) 2954, 1722, 1625, 1462, 1438, 1364, 1285, 1252, 1165, 1088, 1023  $\text{cm}^{-1}$ ; HRMS (ESI-TOF)  $m/z$   $[\text{M}+\text{H}]^+$  calcd for  $\text{C}_{25}\text{H}_{38}\text{NO}_8\text{S}_2$ : 544.2033; Found 544.2043.

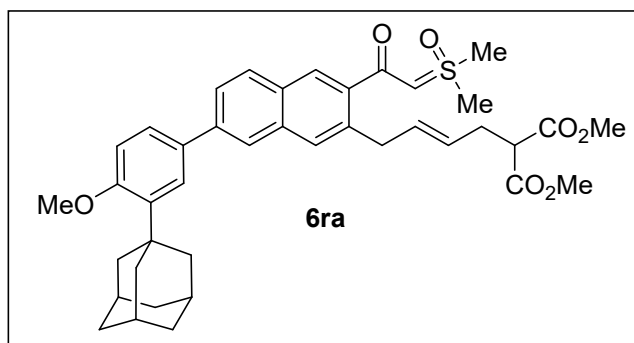

**Dimethyl 2-((*E*)-4-(7-(3-((3*r*,5*r*,7*r*)-adamantan-1-yl)-4-methoxyphenyl)-3-(2-(dimethyl(oxo)-16 sulfaneylidene)acetyl)naphthalen-2-yl)but-2-en-1-yl)malonate 6ra.** Analytical TLC on silica gel, 8:2 ethyl acetate/hexane  $R_f = 0.31$ ; brown sticky liquid; yield 68% (40 mg); major diastereomer ( $E/Z > 23:1$ );  $^1\text{H}$  NMR (400 MHz,  $\text{CDCl}_3$ )  $\delta$  7.91 (d,  $J = 5.2$  Hz, 2H), 7.82 (d,  $J = 8.4$  Hz, 1H), 7.69-7.66 (m, 2H), 7.59-7.58 (m, 1H), 7.53-7.51 (m, 1H), 6.97 (d,  $J = 8.4$  Hz, 1H), 5.84-5.78 (m, 1H), 5.50-5.44 (m, 1H), 4.81 (bs, 1H), 3.90 (s, 3H), 3.81 (d,  $J = 7.2$  Hz, 2H), 3.73 (s, 6H), 3.68 (s, 0.26H, minor), 3.57 (s, 6H), 3.48 (t,  $J = 8.4$  Hz, 1H), 2.81 (t,  $J = 7.6$  Hz, 2H), 2.18 (s, 6H), 2.10 (s, 3H), 1.80 (s, 6H);  $^{13}\text{C}$  NMR (100 MHz,  $\text{CDCl}_3$ )  $\delta$  186.9, 169.7, 158.8, 139.0, 136.3, 134.3, 133.2, 133.1, 132.2, 131.7, 130.4, 129.6, 128.4, 128.1, 126.0, 125.7, 125.5, 124.8, 124.4, 124.2, 112.3, 77.4, 55.3, 52.7, 51.8, 47.9, 42.5, 40.8, 40.2, 37.3, 31.2, 29.3, 27.1; FT-IR (neat) 2903, 1721, 1643, 1495, 1255, 1202, 1143, 1034  $\text{cm}^{-1}$ ; HRMS (ESI-TOF)  $m/z$   $[\text{M}+\text{H}]^+$  calcd for  $\text{C}_{40}\text{H}_{47}\text{O}_7\text{S}$ : 671.3037; Found: 671.3030.

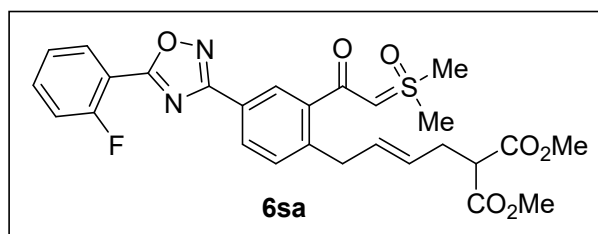

**Dimethyl (*E*)-2-(4-(2-(2-(dimethyl(oxo)-16-sulfaneylidene)acetyl)-4-(5-(2-fluorophenyl)-1,2,4-oxadiazol-3-yl)phenyl)but-2-en-1-yl)-malonate 6sa.** Analytical TLC on silica gel, 8:2 ethyl acetate/hexane  $R_f = 0.25$ ; yellow sticky liquid; yield 79% (60 mg); major diastereomer ( $E/Z > 20:1$ );  $^1\text{H}$  NMR (500 MHz,  $\text{CDCl}_3$ )  $\delta$  8.24-8.19 (m, 2H), 8.07 (d,  $J = 8.0$  Hz, 1H), 7.62-7.58 (m, 1H), 7.35-7.33 (m, 2H), 7.28 (d,  $J$

= 9.5 Hz, 1H), 5.73-5.68 (m, 1H), 5.46-5.41 (m, 1H), 4.81 (bs, 1H), 3.73-3.68 (m, 8H), 3.58 (s, 6H), 3.46 (t,  $J = 7.5$  Hz, 1H), 2.77 (t,  $J = 7.0$  Hz, 2H), 2.61 (0.11H, minor);  $^{13}\text{C}$  NMR (150 MHz,  $\text{CDCl}_3$ )  $\delta$  173.0, 169.6, 168.4, 161.8, 160.0, 134.8 ( $J_{\text{C-F}} = 8.6$  Hz), 131.3, 131.2, 130.7, 130.6, 130.5, 126.9, 126.0, 124.9, 124.8 ( $J_{\text{C-F}} = 3.6$  Hz), 124.6, 117.3 ( $J_{\text{C-F}} = 20.7$  Hz), 113.0 ( $J_{\text{C-F}} = 11.6$  Hz), 67.6, 52.7, 51.7, 42.2, 31.1, 27.1;  $^{19}\text{F}$  NMR (377 MHz,  $\text{CDCl}_3$ )  $\delta$  -108.34; FT-IR (neat) 3012, 1720, 1252, 1226, 1067, 757  $\text{cm}^{-1}$ ; HRMS (ESI-TOF)  $m/z$   $[\text{M}+\text{H}]^+$  calcd for  $\text{C}_{27}\text{H}_{28}\text{FN}_2\text{O}_7\text{S}$ : 543.1596; Found 543.1578.

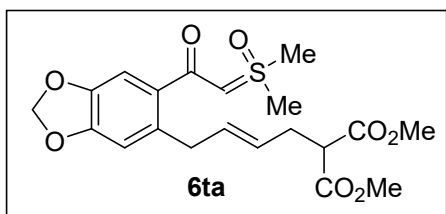

**Dimethyl (E)-2-(4-(6-(2-(dimethyl(oxo)-16-sulfaneyli-**

**dene)acetyl)benzo[d][1,3]dioxol-5-yl)but-2-en-1-yl)malonate 6ta.** Analytical TLC on silica gel, 8:2 ethyl acetate/hexane  $R_f = 0.28$ ; yellow sticky liquid; yield 85% (75 mg); major diastereomer ( $E/Z > 23:1$ );  $^1\text{H}$  NMR (500 MHz,  $\text{CDCl}_3$ )  $\delta$  6.99 (d,  $J = 8.0$  Hz, 1H), 6.61 (d,  $J = 8.0$  Hz, 1H), 5.96 (s, 2H), 5.70-5.65 (m, 1H), 5.35-5.29 (m, 1H), 4.62 (bs, 1H), 3.72 (s, 6H), 3.66 (s, 0.20H, minor), 3.60 (d,  $J = 7.0$  Hz, 2H), 3.50 (s, 6H), 3.45 (t,  $J = 7.5$  Hz, 1H), 2.77 (t,  $J = 7.5$  Hz, 2H);  $^{13}\text{C}$  NMR (150 MHz,  $\text{CDCl}_3$ )  $\delta$  185.7, 169.7, 147.9, 146.5, 135.4, 131.0, 125.0, 122.2, 120.7, 105.8, 101.2, 70.9, 52.6, 51.8, 42.4, 27.0, 25.2; FT-IR (neat) 2959, 1722, 1670, 1462, 1438, 1364, 1255, 1243  $\text{cm}^{-1}$ ; HRMS (ESI-TOF)  $m/z$   $[\text{M}+\text{H}]^+$  calcd for  $\text{C}_{20}\text{H}_{25}\text{O}_8\text{S}$ : 425.1265; Found 425.1273.

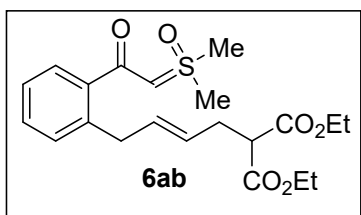

**Diethyl (E)-2-(4-(2-(2-(dimethyl(oxo)-16-sulfaneylidene)-**

**acetyl)phenyl)but-2-en-1-yl)malonate 6ab.** Analytical TLC on silica gel, 7:3 ethyl acetate/hexane  $R_f = 0.35$ ; brown sticky liquid; yield 87% (95 mg); major diastereomer ( $E/Z > 21:1$ );  $^1\text{H}$  NMR (500 MHz,  $\text{CDCl}_3$ )  $\delta$  7.37 (d,  $J = 7.5$  Hz, 1H), 7.27-7.24 (m, 1H), 7.19-7.14 (m, 2H), 5.70-5.65 (m, 1H), 5.41-5.36 (m, 1H), 4.65 (bs, 1H), 4.18 (q,  $J = 7.0$  Hz, 4H), 3.63 (d,  $J = 7.5$  Hz, 2H), 3.52 (s, 6H), 3.39 (t,  $J = 7.5$  Hz, 1H), 2.74 (t,  $J = 7.5$  Hz, 2H), 2.60-2.56 (m, 0.09H, minor), 1.25 (t,  $J = 7.0$  Hz, 6H);  $^{13}\text{C}$  NMR (150 MHz,  $\text{CDCl}_3$ )  $\delta$  186.8, 169.2, 141.1, 138.1, 132.0, 129.8, 129.2, 127.5, 125.9, 125.3, 71.9, 61.5, 52.0, 42.3, 31.0, 26.9, 14.2; FT-IR (neat) 2981, 1726, 1336, 1277, 1296, 1212, 1067  $\text{cm}^{-1}$ ; HRMS (ESI-TOF)  $m/z$   $[\text{M}+\text{H}]^+$  calcd for  $\text{C}_{21}\text{H}_{29}\text{O}_6\text{S}$ : 409.1679; Found 409.1689.

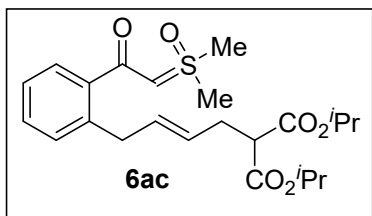

**Diisopropyl (E)-2-(4-(2-(2-(dimethyl(oxo)-16-sulfaneylidene)acetyl)phenyl)but-2-en-1-yl)malonate 6ac.** Analytical TLC on silica gel, 8:2 ethyl acetate/hexane  $R_f = 0.32$ ; yellow sticky liquid; yield 85% (50 mg); major diastereomer ( $E/Z > 21:1$ );  $^1\text{H NMR}$  (500 MHz,  $\text{CDCl}_3$ )  $\delta$  7.37 (d,  $J = 7.5$  Hz, 1H), 7.28-7.25 (m, 1H), 7.20-7.14 (m, 2H), 5.69-5.64 (m, 1H), 5.42-5.37 (m, 1H), 5.06-5.01 (m, 2H), 3.63 (d,  $J = 7.0$  Hz, 2H), 3.53 (s, 6H), 3.32 (t,  $J = 7.5$  Hz, 1H), 2.71 (t,  $J = 7.0$  Hz, 2H), 2.57 (t,  $J = 7.0$  Hz, 0.09H, minor), 1.24-1.22 (m, 12H);  $^{13}\text{C NMR}$  (150 MHz,  $\text{CDCl}_3$ )  $\delta$  186.8, 168.8, 141.1, 138.2, 131.8, 129.8, 129.3, 127.6, 125.9, 125.5, 69.0, 52.4, 42.3, 31.1, 26.8, 21.8, 21.7; FT-IR (neat) 2971, 1720, 1574, 1442, 1258, 1144  $\text{cm}^{-1}$ ; HRMS (ESI-TOF)  $m/z$   $[\text{M}+\text{H}]^+$  calcd for  $\text{C}_{23}\text{H}_{33}\text{O}_6\text{S}$ : 437.1992; Found 437.1992.

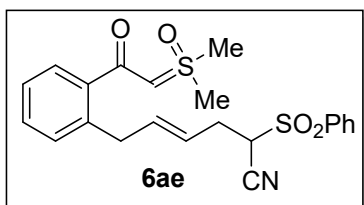

**(E)-6-(2-(2-(2-(dimethyl(oxo)-16-sulfaneylidene)acetyl)phenyl)-2-(phenylsulfonyl)hex-4-enenitrile 6ae.** Analytical TLC on silica gel, 9:1 ethyl acetate/hexane  $R_f = 0.35$ ; brown sticky liquid; yield 83% (48 mg); major diastereomer ( $E/Z > 21:1$ );  $^1\text{H NMR}$  (600 MHz,  $\text{CDCl}_3$ )  $\delta$  7.98 (d,  $J = 7.2$  Hz, 2H), 7.76 (t,  $J = 7.2$  Hz, 1H), 7.63 (t,  $J = 7.8$  Hz, 2H), 7.38 (d,  $J = 7.2$  Hz, 1H), 7.28-7.26 (m, 1H), 7.19-7.14 (m, 2H), 5.93-5.88 (m, 1H), 5.39-5.34 (m, 1H), 4.72 (s, 1H), 4.03-4.00 (m, 1H), 3.79-3.78 (m, 0.05H, minor), 3.70-3.67 (m, 1H), 3.54 (s, 4H), 3.45 (s, 3H), 2.90-2.88 (m, 1H), 2.58-2.52 (m, 1H);  $^{13}\text{C NMR}$  (150 MHz,  $\text{CDCl}_3$ )  $\delta$  187.1, 141.0, 136.9, 136.8, 135.6, 135.4, 130.4, 129.7, 129.4, 127.7, 126.3, 122.0, 114.2, 72.4, 57.7, 42.2, 42.0, 36.2, 30.2; FT-IR (neat) 3012, 1725, 1339, 1289, 1253, 1218, 1052  $\text{cm}^{-1}$ ; HRMS (ESI-TOF)  $m/z$   $[\text{M}+\text{H}]^+$  calcd for  $\text{C}_{22}\text{H}_{24}\text{NO}_4\text{S}_2$ : 430.1141; Found 430.1141.

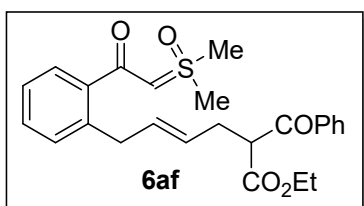

**Ethyl (E)-2-benzoyl-6-(2-(2-(2-(dimethyl(oxo)-16-sulfaneylidene)acetyl)phenyl)hex-4-enoate 6af.** Analytical TLC on silica gel, 8:2 ethyl acetate/hexane  $R_f = 0.35$ ; brown sticky liquid; yield 87% (51 mg); major diastereomer ( $E/Z > 23:1$ );  $^1\text{H NMR}$



(600 MHz, CDCl<sub>3</sub>)  $\delta$  7.99 (d,  $J$  = 7.8 Hz, 2H), 7.60 (t,  $J$  = 7.2 Hz, 1H), 7.49 (t,  $J$  = 7.8 Hz, 2H), 7.40 (d,  $J$  = 7.2 Hz, 1H), 7.27 (d,  $J$  = 6.6 Hz, 1H), 7.20-7.17 (m, 2H), 5.71-5.67 (m, 1H), 5.47-5.43 (m, 1H), 4.67 (bs, 1H), 4.40 (t,  $J$  = 7.2 Hz, 1H), 4.15 (q,  $J$  = 7.2 Hz, 2H), 3.67 (s, 2H), 3.52 (d,  $J$  = 6.0 Hz, 6H), 2.92-2.83 (m, 2H), 1.17 (t,  $J$  = 7.2 Hz, 3H); <sup>13</sup>C NMR (150 MHz, CDCl<sub>3</sub>)  $\delta$  195.1, 186.9, 169.7, 141.2, 138.2, 136.4, 133.7, 132.0, 129.8, 129.2, 128.9, 128.8, 127.5, 125.9, 125.7, 71.8, 61.6, 54.2, 42.3, 31.0, 27.2, 14.1; FT-IR (neat) 2987, 1723, 1673, 1323, 1272, 1221, 1210, 1053 cm<sup>-1</sup>; HRMS (ESI-TOF)  $m/z$  [M+H]<sup>+</sup> calcd for C<sub>25</sub>H<sub>29</sub>O<sub>5</sub>S: 441.1730; Found 441.1728.

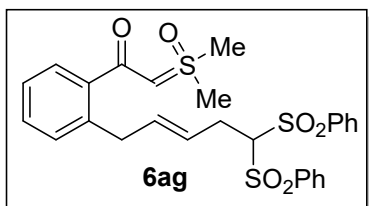

**(E)-1-(2-(5,5-bis(phenylsulfonyl)pent-2-en-1-yl)phenyl)-2-**

**(dimethyl(oxo)-16-sulfaneylidene)ethan-1-one 6ag.** Analytical TLC on silica gel, 8:2 ethyl acetate/hexane  $R_f$  = 0.35; brown sticky liquid; yield 85% (60 mg); major diastereomer ( $E/Z$  > 23:1); <sup>1</sup>H NMR (500 MHz, CDCl<sub>3</sub>)  $\delta$  7.90 (d,  $J$  = 7.5 Hz, 4H), 7.66 (t,  $J$  = 7.0 Hz, 2H), 7.52 (t,  $J$  = 7.5 Hz, 4H), 7.41 (d,  $J$  = 7.0 Hz, 1H), 7.30-7.28 (m, 1H), 7.22-7.19 (m, 1H), 7.11 (d,  $J$  = 7.5 Hz, 1H), 5.63-5.57 (m, 1H), 5.46-5.41 (m, 1H), 4.50 (t,  $J$  = 5.0 Hz, 1H), 3.53 (s, 8H), 2.85 (t,  $J$  = 5.5 Hz, 2H); <sup>13</sup>C NMR (150 MHz, CDCl<sub>3</sub>)  $\delta$  186.9, 141.2, 137.8, 137.3, 134.8, 134.6, 130.3, 129.8, 129.3, 129.2, 127.7, 126.2, 124.6, 83.7, 72.3, 42.2, 36.2, 29.0; FT-IR (neat) 3010, 1723, 1673, 1340, 1290, 1253, 1220, 1067 cm<sup>-1</sup>; HRMS (ESI-TOF)  $m/z$  [M+H]<sup>+</sup> calcd for C<sub>27</sub>H<sub>29</sub>O<sub>6</sub>S<sub>3</sub>: 545.1121; Found 545.1127.

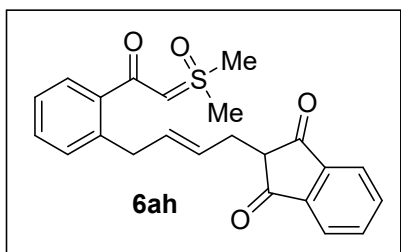

**(E)-2-(4-(2-(2-(dimethyl(oxo)-16-sulfaneylidene)acetyl)-**

**phenyl)but-2-en-1-yl)-1H-indene-1,3(2H)-dione 6ah.** Analytical TLC on silica gel, 7:3 ethyl acetate/hexane  $R_f$  = 0.35; brown sticky liquid; yield 79% (89 mg); major diastereomer ( $E/Z$  > 23:1); <sup>1</sup>H NMR (400 MHz, CDCl<sub>3</sub>)  $\delta$  7.95-7.93 (m, 2H), 7.84-7.82 (m, 2H), 7.43-7.37 (m, 1H), 7.34-7.32 (m, 1H), 7.14-7.10 (m, 1H), 6.92-6.90 (m, 1H), 6.70-6.68 (m, 0.04H, minor), 5.74-5.67 (m, 1H), 5.38-5.30 (m, 1H), 4.58 (bs, 1H), 3.51 (s, 6H), 3.42 (d,  $J$  = 6.8 Hz, 2H), 3.06 (t,  $J$  = 5.6 Hz, 1H), 2.71 (t,  $J$  = 5.6 Hz, 2H); <sup>13</sup>C NMR (100 MHz, CDCl<sub>3</sub>)  $\delta$  200.7, 186.8, 142.8, 140.9, 137.7, 135.8, 133.8, 130.9, 129.8, 129.1, 128.3, 127.5, 126.7, 125.8, 125.5, 123.2, 71.5,

53.8, 42.7, 42.4, 36.0, 30.0; FT-IR (neat) 2980, 1723, 1681, 1339, 1276, 1253, 1250, 1061  $\text{cm}^{-1}$ ; HRMS (ESI-TOF)  $m/z$   $[\text{M}+\text{H}]^+$  calcd for  $\text{C}_{23}\text{H}_{23}\text{O}_4\text{S}$ : 351.1203; Found 351.1211.

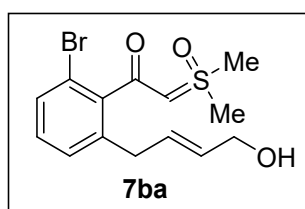

**(E)-1-(2-bromo-6-(4-hydroxybut-2-en-1-yl)phenyl)-2-(dimethyl(oxo)-l6-sulfaneylidene)ethan-1-one 7ba.** Analytical TLC on silica gel, 9:1 ethyl acetate/hexane  $R_f = 0.35$ ; yellow sticky liquid; yield 71% (45 mg); major diastereomer ( $E/Z > 19:1$ );  $^1\text{H}$  NMR (400 MHz,  $\text{CDCl}_3$ )  $\delta$  7.38 (d,  $J = 7.6$  Hz, 1H), 7.14-7.07 (m, 2H), 5.86-5.79 (m, 1H), 5.72-5.65 (m, 1H), 4.54 (s, 1H), 4.08 (d,  $J = 5.6$  Hz, 2H), 3.58 (s, 0.20H, minor), 3.55 (s, 6H), 3.48 (d,  $J = 6.4$  Hz, 2H);  $^{13}\text{C}$  NMR (125 MHz,  $\text{CDCl}_3$ )  $\delta$  184.1, 142.8, 138.6, 131.3, 130.9, 130.6, 129.4, 128.6, 120.2, 72.9, 63.6, 42.3, 36.6; FT-IR (neat) 3020, 2920, 1732, 1549, 1382, 1162, 1094  $\text{cm}^{-1}$ ; HRMS (ESI-TOF)  $m/z$   $[\text{M}+\text{H}]^+$  calcd for  $\text{C}_{14}\text{H}_{18}\text{BrO}_3\text{S}$ : 345.0155; Found 345.0175.

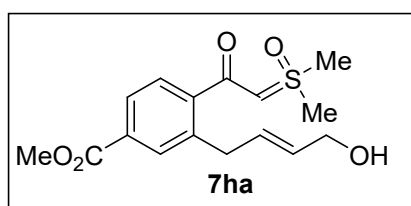

**Methyl (E)-4-(2-(dimethyl(oxo)-l6-sulfaneylidene)acetyl)-3-(4-hydroxybut-2-en-1-yl)benzoate 7ha.** Analytical TLC on silica gel, 9:1 ethyl acetate/hexane  $R_f = 0.35$ ; brown sticky liquid; yield 66% (42 mg); major diastereomer ( $E/Z > 20:1$ );  $^1\text{H}$  NMR (400 MHz,  $\text{CDCl}_3$ )  $\delta$  7.87-7.85 (m, 2H), 7.44 (d,  $J = 8.4$  Hz, 1H), 5.89-5.82 (m, 1H), 5.70-5.63 (m, 1H), 4.68 (bs, 1H), 4.21 (d,  $J = 6.0$  Hz, 0.07H, minor), 4.09 (d,  $J = 6.0$  Hz, 2H), 3.91 (s, 3H), 3.64 (d,  $J = 6.0$  Hz, 2H), 3.53 (s, 6H);  $^{13}\text{C}$  NMR (100 MHz,  $\text{CDCl}_3$ )  $\delta$  185.8, 166.9, 145.4, 138.0, 131.6, 131.4, 130.7, 127.7, 127.5, 72.5, 64.4, 63.8, 52.3, 42.4, 41.1, 36.1; FT-IR (neat) 3015, 2903, 1725, 1567, 1370, 1162, 1093  $\text{cm}^{-1}$ ; HRMS (ESI-TOF)  $m/z$   $[\text{M}+\text{H}]^+$  calcd for  $\text{C}_{16}\text{H}_{21}\text{O}_5\text{S}$ : 325.1104; Found 325.1105.

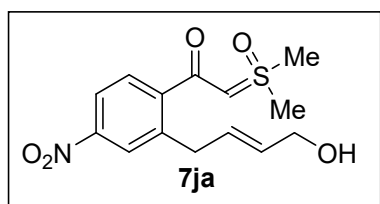

**(E)-2-(dimethyl(oxo)-l6-sulfaneylidene)-1-(2-(4-hydroxybut-2-en-1-yl)-4-nitrophenyl)ethan-1-one 7ja.** Analytical TLC on silica gel, 9:1 ethyl acetate/hexane  $R_f = 0.35$ ; brown sticky liquid; yield 63% (41 mg); major diastereomer ( $E/Z >$

20:1);  $^1\text{H}$  NMR (400 MHz,  $\text{CDCl}_3$ )  $\delta$  8.06-8.03 (m, 2H), 7.51 (d,  $J = 7.6$  Hz, 1H), 5.88-5.81 (m, 1H), 5.74-5.67 (m, 1H), 4.69 (s, 1H), 4.12 (d,  $J = 5.6$  Hz, 2H), 3.68 (d,  $J = 6.0$  Hz, 2H), 3.56-3.55 (m, 6H);  $^{13}\text{C}$  NMR (125 MHz,  $\text{CDCl}_3$ )  $\delta$  184.2, 148.1, 147.1, 139.8, 131.6, 130.1, 128.5, 125.2, 121.4, 73.0, 63.5, 42.3, 36.0; FT-IR (neat) 3036, 2915, 1732, 1550, 1381, 1161, 1093  $\text{cm}^{-1}$ ; HRMS (ESI-TOF)  $m/z$   $[\text{M}+\text{H}]^+$  calcd for  $\text{C}_{14}\text{H}_{18}\text{NO}_5\text{S}$ : 312.0900; Found 312.0916.

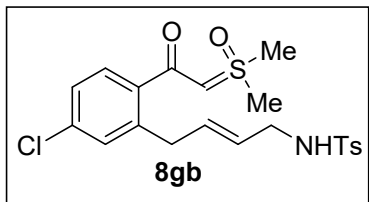

**(E)-N-(4-(5-chloro-2-(2-(dimethyl(oxo)-16-sulfaneylidene)-**

**acetyl)phenyl)but-2-en-1-yl)-4-methylbenzenesulfonamide 8gb.** Analytical TLC on silica gel, 8:2 ethyl acetate/hexane  $R_f = 0.32$ ; brown sticky liquid; yield 61% (30 mg); major diastereomer ( $E/Z = 12:1$ );  $^1\text{H}$  NMR (500 MHz,  $\text{CDCl}_3$ )  $\delta$  7.74-7.68 (m, 2H, major + minor), 7.34 (d,  $J = 8.5$  Hz, 0.2H, minor), 7.30 (d,  $J = 8.0$  Hz, 1H), 7.26-7.25 (m, 2H, major + minor), 7.17-7.15 (m, 1H), 7.12-7.11 (m, 0.2H, minor), 7.08-7.07 (m, 1H, major), 5.73-5.67 (m, 1H, major), 5.35-5.29 (m, 1H, major), 5.05 (t,  $J = 5.5$  Hz, 1H, major), 4.79 (bs, 1H, major), 3.61 (m, 0.51H, minor), 3.54-3.51 (m, 8H, major + minor), 3.45 (t,  $J = 6.0$  Hz, 2H, major), 2.40 (s, 3H, major + minor);  $^{13}\text{C}$  NMR (150 MHz,  $\text{CDCl}_3$ )  $\delta$  186.4, 143.5, 139.4, 137.1, 135.0, 133.0, 130.5, 129.8, 129.1, 128.5, 128.1, 127.2, 127.1, 126.3, 126.1, 73.2, 45.4, 42.1, 35.9, 21.6; FT-IR (neat) 3392, 2963, 1734, 1605, 1520, 1385, 1182  $\text{cm}^{-1}$ ; HRMS (ESI-TOF)  $m/z$   $[\text{M}+\text{H}]^+$  calcd for  $\text{C}_{21}\text{H}_{25}\text{ClNO}_4\text{S}_2$ : 454.0908; Found 454.0912.

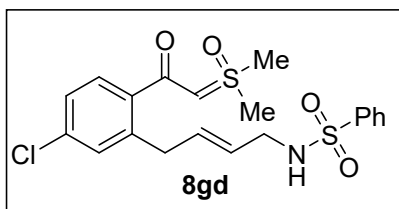

**(E)-N-(4-(5-chloro-2-(2-(dimethyl(oxo)-16-sulfaneylidene)-**

**acetyl)phenyl)but-2-en-1-yl)benzenesulfonamide 8gd.** Analytical TLC on silica gel, 7:3 ethyl acetate/hexane  $R_f = 0.35$ ; brown sticky liquid; yield 72% (30 mg); major diastereomer ( $E/Z > 20:1$ );  $^1\text{H}$  NMR (500 MHz,  $\text{CDCl}_3$ )  $\delta$  7.93 (d,  $J = 7.5$  Hz, 2H), 7.90 (d,  $J = 7.5$  Hz, 0.09H, minor), 7.55 (t,  $J = 7.5$  Hz, 1H), 7.50 (t,  $J = 8.0$  Hz, 2H), 7.40 (d,  $J = 8.0$  Hz, 1H), 7.18-7.15 (m, 2H), 7.04 (t,  $J = 5.5$  Hz, 1H), 5.54-5.49 (m, 1H), 5.47-5.42 (m, 1H), 4.74 (bs, 1H), 3.58 (s, 6H), 3.56-3.51 (m, 4H);  $^{13}\text{C}$  NMR (125 MHz,  $\text{CDCl}_3$ )  $\delta$  184.8, 140.4, 140.3, 138.4, 135.5, 133.9, 132.6, 131.0, 130.0, 129.2, 127.2, 126.5, 123.7, 73.9, 43.1, 39.4, 32.3; FT-IR (neat) 3373, 2941, 1737, 1592, 1512, 1343, 1080  $\text{cm}^{-1}$ ; HRMS (ESI-TOF)  $m/z$   $[\text{M}+\text{H}]^+$  calcd for  $\text{C}_{20}\text{H}_{22}\text{ClNO}_4\text{S}_2$ : 440.0752; Found 440.0754.

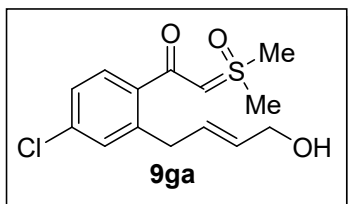

**(E)-1-(4-chloro-2-(4-hydroxybut-2-en-1-yl)phenyl)-2-**

**(dimethyl(oxo)-16-sulfaneylidene)ethan-1-one 9ga.** Analytical TLC on silica gel, 9:1 ethyl acetate/hexane  $R_f = 0.35$ ; brown sticky liquid; yield 67% (46 mg); major diastereomer ( $E/Z > 20:1$ );  $^1\text{H NMR}$  (600 MHz,  $\text{CDCl}_3$ )  $\delta$  7.33 (d,  $J = 7.8$  Hz, 1H), 7.17-7.16 (m, 2H), 5.85-5.80 (m, 1H), 5.69-5.64 (m, 1H), 4.65 (bs, 1H), 4.19 (d,  $J = 7.2$  Hz, 0.10H, minor), 4.10 (d,  $J = 6.0$  Hz, 2H), 3.59 (d,  $J = 6.6$  Hz, 2H), 3.51 (s, 6H);  $^{13}\text{C NMR}$  (150 MHz,  $\text{CDCl}_3$ )  $\delta$  185.8, 139.9, 139.5, 131.2, 130.8, 130.3, 129.1, 126.2, 72.1, 63.7, 42.4, 36.0; FT-IR (neat) 3010, 2920, 1731, 1539, 1383, 1154, 1087  $\text{cm}^{-1}$ ; HRMS (ESI-TOF)  $m/z$   $[\text{M}+\text{H}]^+$  calcd for  $\text{C}_{14}\text{H}_{18}\text{ClO}_3\text{S}$ : 301.0660; Found 301.0664.

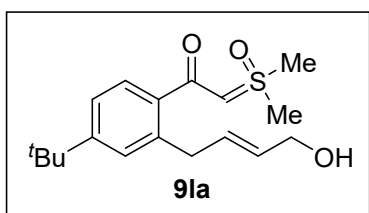

**(E)-1-(4-(tert-butyl)-2-(4-hydroxybut-2-en-1-yl)phenyl)-2-**

**(dimethyl(oxo)-16-sulfaneylidene)ethan-1-one 9la.** Analytical TLC on silica gel, 9:1 ethyl acetate/hexane  $R_f = 0.35$ ; brown sticky liquid; yield 74% (24 mg); major diastereomer ( $E/Z > 19:1$ );  $^1\text{H NMR}$  (400 MHz,  $\text{CDCl}_3$ )  $\delta$  7.34 (d,  $J = 8.0$  Hz, 1H), 7.22-7.18 (m, 2H), 5.90-5.83 (m, 1H), 5.69-5.64 (m, 1H), 4.67 (bs, 1H), 4.07 (d,  $J = 5.6$  Hz, 2H), 3.63 (d,  $J = 6.0$  Hz, 2H), 3.52 (s, 1H), 3.50 (s, 6H), 1.30 (s, 9H);  $^{13}\text{C NMR}$  (125 MHz,  $\text{CDCl}_3$ )  $\delta$  187.2, 141.8, 138.3, 137.4, 132.7, 129.8, 127.7, 127.6, 123.1, 71.4, 63.9, 42.4, 41.2, 36.7, 34.8, 31.4; FT-IR (neat) 3023, 2921, 1730, 1543, 1375, 1160, 1076  $\text{cm}^{-1}$ ; HRMS (ESI-TOF)  $m/z$   $[\text{M}+\text{H}]^+$  calcd for  $\text{C}_{18}\text{H}_{27}\text{O}_3\text{S}$ : 323.1675; Found 323.1690.

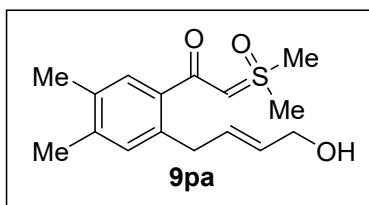

**(E)-2-(dimethyl(oxo)-16-sulfaneylidene)-1-(2-(4-hydroxybut-**

**2-en-1-yl)-4,5-dimethylphenyl)ethan-1-one 9pa.** Analytical TLC on silica gel, 9:1 ethyl acetate/hexane  $R_f = 0.35$ ; brown sticky liquid; yield 72% (22 mg); major diastereomer ( $E/Z > 21:1$ );  $^1\text{H NMR}$  (400 MHz,  $\text{CDCl}_3$ )  $\delta$  7.20 (s, 1H), 6.94 (s, 1H), 5.88-5.81 (m, 1H), 5.67-5.61 (m, 1H), 4.66 (bs, 1H), 4.06 (d,  $J = 5.6$  Hz, 2H), 3.55 (d,  $J = 6.4$  Hz, 2H), 3.51 (s, 6H), 2.22 (d,  $J = 4.0$  Hz, 6H);  $^{13}\text{C NMR}$  (125 MHz,  $\text{CDCl}_3$ )  $\delta$  187.2, 138.5, 138.0, 135.0, 134.3, 132.8, 131.8,

129.7, 129.1, 71.5, 64.4, 63.9, 42.4, 35.9, 19.7, 19.3; FT-IR (neat) 3054, 2923, 1718, 1539, 1389, 1140, 1091  $\text{cm}^{-1}$ ; HRMS (ESI-TOF)  $m/z$   $[M+H]^+$  calcd for  $\text{C}_{16}\text{H}_{23}\text{O}_3\text{S}$ : 295.1362; Found 295.1382.

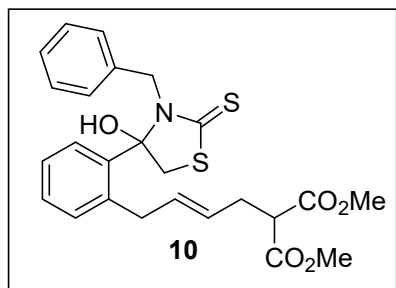

**Dimethyl (*E*)-2-(4-(2-(3-benzyl-4-hydroxy-2-thioxothiazolidin-4-yl)phenyl)but-2-en-1-yl)malonate 10.** Analytical TLC on silica gel, 2:8 ethyl acetate/hexane  $R_f$  = 0.30; colorless sticky liquid; yield 57% (19 mg); major diastereomer ( $E/Z$  = 8:1);  $^1\text{H}$  NMR (400 MHz,  $\text{CDCl}_3$ )  $\delta$  7.79 (d,  $J$  = 7.6 Hz, 1H, major + minor), 7.68 (bs, 1H, major + minor), 7.45 (t,  $J$  = 7.2 Hz, 1H, major + minor), 7.37-7.30 (m, 7H, major + minor), 7.22 (s, 1H, major + minor), 5.66-5.60 (m, 1H, major + minor), 5.44-5.38 (m, 2H, major + minor), 4.90 (d,  $J$  = 5.2 Hz, 1H, major + minor), 4.67 (s, 1H, major + minor), 4.27 (d,  $J$  = 14.4 Hz, 1H, major + minor), 3.74 (s, 1H, minor), 3.72-3.69 (m, 6H, major), 3.66-3.62 (m, 2H, major + minor), 3.45-3.42 (m, 1H, major + minor), 2.74 (t,  $J$  = 7.6 Hz, 2H, major + minor);  $^{13}\text{C}$  NMR (100 MHz,  $\text{CDCl}_3$ )  $\delta$  197.5 (major), 196.09 (minor), 169.6 (major), 169.5 (minor), 141.2 (major + minor), 136.6 (major), 136.4 (minor), 136.0 (major + minor), 132.3 (major + minor), 131.3 (major + minor), 131.0 (major + minor), 130.0 (major + minor), 129.1 (major + minor), 128.9 (major + minor), 128.7 (major + minor), 128.5 (major + minor), 128.3 (major + minor), 126.7 (major + minor), 126.3 (major + minor), 126.0 (major + minor), 52.8 (major + minor), 52.7 (major + minor), 51.8 (minor), 51.7 (major), 51.5 (major + minor), 45.2 (major + minor), 31.6 (major + minor), 27.1 (minor), 27.0 (major); FT-IR (neat) 3015, 2936, 1750, 1532, 1361, 1156, 1182  $\text{cm}^{-1}$ ; HRMS (ESI-TOF)  $m/z$   $[M+\text{Na}]^+$  calcd for  $\text{C}_{25}\text{H}_{27}\text{NO}_5\text{S}_2\text{Na}$ : 508.1223; Found 508.1222.

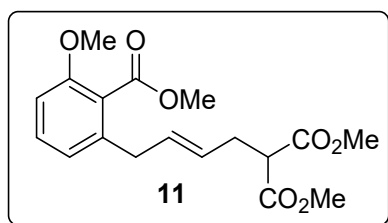

**Dimethyl (*E*)-2-(4-(3-methoxy-2-(methoxycarbonyl)phenyl)but-2-en-1-yl)malonate 11.** Analytical TLC on silica gel, 3:7 ethyl acetate/hexane  $R_f$  = 0.25; colorless sticky liquid; yield 82% (40 mg); major diastereomer ( $E/Z$  = 8:1);  $^1\text{H}$  NMR (400 MHz,  $\text{CDCl}_3$ )  $\delta$  7.29-7.25 (m, 1H, major + minor), 6.79-6.76 (m, 2H, major + minor), 5.66-5.59 (m, 1H, major + minor), 5.48-5.41 (m, 1H, major + minor), 3.90 (s, 0.4H, minor)

3.89 (s, 3H, major), 3.81 (s, 3H, major + minor), 3.74 (s, 0.8H, minor), 3.71 (s, 6H, major), 3.42 (t,  $J = 7.6$  Hz, 1H, major + minor), 3.36 (d,  $J = 7.2$  Hz, 0.35H, minor), 3.26 (d,  $J = 6.8$  Hz, 2H, major), 2.73 (t,  $J = 7.2$  Hz, 0.39H, minor), 2.60 (t,  $J = 7.2$  Hz, 2H, major);  $^{13}\text{C}$  NMR (150 MHz,  $\text{CDCl}_3$ )  $\delta$  169.5 (major + minor), 168.7 (major + minor), 156.6 (major + minor), 139.1 (minor), 138.9 (major), 131.5 (major), 130.72 (minor), 130.67 (minor), 130.62 (major) 127.4 (major), 126.0 (minor), 123.5 (major + minor), 121.6 (major), 121.5 (major + minor), 109.1 (major + minor), 56.1 (major + minor), 52.7 (minor), 52.6 (major), 52.4 (minor), 52.3 (major), 51.9 (major), 51.7 (minor), 36.5 (major), 31.9 (major), 31.2 (minor), 26.9 (minor); FT-IR (neat) 2979, 2932, 1715, 1600, 1575, 1454, 1432, 1259, 1102  $\text{cm}^{-1}$ ; HRMS (ESI-TOF)  $m/z$   $[\text{M}+\text{Na}]^+$  calcd for  $\text{C}_{18}\text{H}_{22}\text{O}_7\text{Na}$ : 373.1258; Found 373.1258.

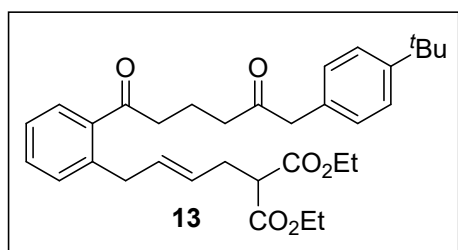

**Diethyl (E)-2-(4-(2-(6-(4-(*tert*-butyl)phenyl)-5-**

**oxohexanoyl)phenyl)but-2-en-1-yl)malonate 13.** Analytical TLC on silica gel, 2:8 ethyl acetate/hexane  $R_f = 0.30$ ; colorless sticky liquid; yield 81% (26 mg); major diastereomer ( $E/Z > 21:1$ );  $^1\text{H}$  NMR (400 MHz,  $\text{CDCl}_3$ )  $\delta$  7.52 (d,  $J = 7.6$  Hz, 1H), 7.40-7.32 (m, 3H), 7.27 (s, 1H), 7.24-7.22 (m, 1H), 7.12 (d,  $J = 8.4$  Hz, 2H), 5.61-5.54 (m, 1H), 5.44-5.38 (m, 1H), 4.20 (q,  $J = 7.2$  Hz, 4H), 3.66 (s, 2H), 3.60 (d,  $J = 7.2$  Hz, 2H), 3.40 (t,  $J = 7.6$  Hz, 1H), 2.86 (t,  $J = 7.2$  Hz, 2H), 2.75 (t,  $J = 7.6$  Hz, 2H), 2.58 (t,  $J = 7.2$  Hz, 2H), 1.99-1.92 (m, 2H), 1.30 (s, 9H), 1.26 (t,  $J = 6.8$  Hz, 6H);  $^{13}\text{C}$  NMR (125 MHz,  $\text{CDCl}_3$ )  $\delta$  208.3, 204.2, 169.2, 150.0, 140.3, 138.2, 131.5, 131.4, 131.2, 131.0, 129.2, 128.5, 126.2, 125.9, 125.8, 61.6, 52.1, 49.8, 41.0, 40.7, 34.6, 31.7, 31.5, 26.9, 18.4, 14.2; FT-IR (neat) 3070, 1738, 1671, 1599, 1437, 1166, 1085  $\text{cm}^{-1}$ ; HRMS (ESI-TOF)  $m/z$   $[\text{M}+\text{Na}]^+$  calcd for  $\text{C}_{33}\text{H}_{42}\text{O}_6\text{Na}$ : 557.2874; Found 557.2874.

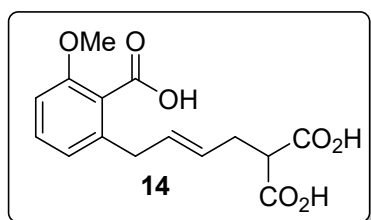

**(E)-2-(4-(2-carboxy-3-methoxyphenyl)but-2-en-1-yl)malonic**

**acid 14.** Analytical TLC on silica gel, 1:9 methanol/ethyl acetate  $R_f = 0.22$ ; colorless solid; mp 115-116  $^\circ\text{C}$ ; yield 80% (35 mg); major diastereomer ( $E/Z > 20:1$ );  $^1\text{H}$  NMR (400 MHz,  $\text{DMSO-}d_6$ )  $\delta$  7.27 (t,  $J = 8.0$  Hz, 1H), 6.88 (d,  $J = 8.4$  Hz, 1H), 6.76 (d,  $J = 7.6$  Hz, 1H), 5.58-5.51 (m, 1H), 5.48-5.40 (m, 1H), 3.73 (s, 3H), 3.25-3.23 (m, 1H), 3.19 (d,  $J = 6.4$  Hz, 2H), 2.39 (t,  $J =$

6.8 Hz, 2H);  $^{13}\text{C}$  NMR (125 MHz, DMSO- $d_6$ )  $\delta$  170.9, 169.2, 155.7, 137.7, 130.4, 130.3, 128.5, 125.0, 121.4, 109.5, 56.0, 51.9, 35.9, 31.7; FT-IR (neat) 3476, 3006, 1731, 1665, 1603, 1435, 1338, 1286  $\text{cm}^{-1}$ ; HRMS (ESI-TOF)  $m/z$   $[\text{M}+\text{Na}]^+$  calcd for  $\text{C}_{15}\text{H}_{16}\text{O}_7\text{Na}$ : 331.0788; Found 331.0790.

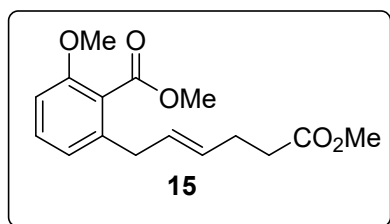

**Methyl (*E*)-2-methoxy-6-(6-methoxy-6-oxohex-2-en-1-yl)benzoate 15.** Analytical TLC on silica gel, 2:8 ethyl acetate /hexane  $R_f$  = 0.30; colorless sticky liquid; yield 85% (17 mg); major diastereomer ( $E/Z > 6:1$ );  $^1\text{H}$  NMR (400 MHz,  $\text{CDCl}_3$ )  $\delta$  7.29-7.25 (m, 1H, major + minor), 6.82-6.77 (m, 2H, major + minor), 5.60-5.44 (m, 2H, major + minor), 3.90-3.89 (m, 3H, major + minor), 3.82 (bs, 3H, major + minor), 3.67-3.65 (m, 3H, major + minor), 3.38 (d,  $J = 6.8$  Hz, 0.31H, minor) 3.28 (d,  $J = 6.4$  Hz, 2H, major), 2.45-2.30 (m, 5H, major + minor);  $^{13}\text{C}$  NMR (150 MHz,  $\text{CDCl}_3$ )  $\delta$  173.7 (major), 173.6 (minor), 168.83 (minor), 168.76 (major), 156.6 (major + minor), 139.4 (minor), 139.3 (major), 130.7 (minor), 130.6 (major), 130.2 (major), 129.3 (major), 129.0 (minor), 128.8 (minor), 123.5 (major + minor), 121.7 (major), 121.5 (minor), 109.0 (major + minor), 56.08 (minor), 56.06 (major), 52.4 (minor), 52.3 (major), 51.73 (minor), 51.67 (major), 36.6 (major), 34.0 (minor), 33.9 (major), 31.1 (minor), 27.9 (major), 22.9 (minor); FT-IR (neat) 1728, 1725, 1612, 1439, 1357, 1280  $\text{cm}^{-1}$ ; HRMS (ESI-TOF)  $m/z$   $[\text{M}+\text{Na}]^+$  calcd for  $\text{C}_{16}\text{H}_{21}\text{O}_5\text{Na}$ : 315.1203; Found 315.1203.

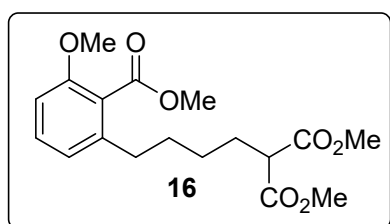

**Dimethyl 2-(4-(3-methoxy-2-(methoxycarbonyl)phenyl)butyl)malonate 16.** Analytical TLC on silica gel, 2:8 ethyl acetate /hexane  $R_f$  = 0.32; colorless sticky liquid; yield 90% (15 mg);  $^1\text{H}$  NMR (400 MHz,  $\text{CDCl}_3$ )  $\delta$  7.28-7.24 (m, 1H), 6.80-6.75 (m, 2H), 3.90 (s, 3H), 3.81 (s, 3H), 3.73 (s, 6H), 3.37-3.31 (m, 1H), 2.56-2.52 (m, 2H), 1.94-1.88 (m, 2H), 1.65-1.59 (m, 2H), 1.38-1.30 (m, 2H);  $^{13}\text{C}$  NMR (125 MHz,  $\text{CDCl}_3$ )  $\delta$  170.0, 169.0, 156.5, 140.8, 130.5, 123.7, 121.6, 108.7, 56.0, 52.6, 52.3, 51.7, 33.2, 30.7, 28.7, 27.2; FT-IR (neat) 1732, 1722, 1665, 1555, 1338, 956  $\text{cm}^{-1}$ ; HRMS (ESI-TOF)  $m/z$   $[\text{M}+\text{Na}]^+$  calcd for  $\text{C}_{18}\text{H}_{24}\text{O}_7\text{Na}$ : 375.1414; Found 375.1419.

## Mechanistic Investigation

**H/D Exchange Experiment of 1a with D<sub>2</sub>O in Absence of 2a.** To a stirred solution of 2-(dimethyl(oxo)-16-sulfaneylidene)-1-phenylethan-1-one **1a** (0.2 mmol, 50 mg), [Cp\*Co(CO)I<sub>2</sub>] (10 mol %, 0.02 mmol, 10 mg) and AgSbF<sub>6</sub> (20 mol %, 0.04 mmol, 13 mg) in 1,2-DCE (5 mL), D<sub>2</sub>O (2 mmol, 0.05 mL) was added and the resultant mixture was stirred at 50 °C in an oil bath for 20 minutes under N<sub>2</sub> atmosphere. The reaction mixture was cooled to room temperature, diluted with ethyl acetate (10 mL) and passed through a short pad of celite. Substrate **1a** was recovered using silica gel chromatography (ethyl acetate: methanol = 9:1) to afford [D<sub>n</sub>]-**1a**. The deuterium incorporation was observed as 23% at C2-H, 16% at the H of  $\alpha$ -C of carbonyl group of [D<sub>n</sub>]-**1a** based on 400 MHz <sup>1</sup>H NMR.

### **Preparation of 2-(Dimethyl(oxo)-16-sulfaneylidene)-1-(4-methoxyphenyl-2,6-d<sub>2</sub>)ethan-1-one **1i-d<sub>2</sub>**.**

**Step-I:** 4-Methoxybenzoic acid (0.50 mmol, 76 mg), [Ru(O<sub>2</sub>CAd)<sub>2</sub>(*p*-cymene)] (5 mol %, 14.9 mg) and D<sub>2</sub>O (10 mmol, 0.18 mL) were stirred in 1,4-dioxane (1 mL) at 100 °C for 16 h under N<sub>2</sub> atmosphere. After cooling to room temperature, the residue was diluted with ethyl acetate (8 mL) and filtered through a short pad of celite. Evaporation of the solvent gave a residue that was purified using silica gel column chromatography (hexane: ethyl acetate: acetic acid= 8:1:0.1) to afford [D]-**1i**.

**Step-II:** To a stirred solution of [D]-**1i** (0.6 mmol, 100 mg) and DMF (1 drop) in CH<sub>2</sub>Cl<sub>2</sub> (2 mL), (COCl)<sub>2</sub> (0.8 mmol, 0.07 mL) was added dropwise. The reaction mixture was allowed to stir at room temperature for 12 h. Then the solvent was evaporated under reduced pressure and the residue having [D]-**1i** acid chloride was used in the subsequent step.

**Step-III:** To a stirred solution of potassium *tert*-butoxide (2.4 mmol, 266 mg) in THF (4 mL), trimethylsulfoxonium iodide (2.4 mmol, 522 mg) was added at room temperature. The solution was allowed to reflux for 3 h. The reaction mixture was then cooled to 0 °C, followed by the slow addition of the solution of the [D]-**1i** acid chloride obtained by the above procedure (**Step II**). The reaction was allowed to warm to room temperature and stirred for 3 h. After completion, the reaction mixture was concentrated under vacuum and water (10 mL) was added to the residue and extracted with ethyl acetate (3 x 10 mL) and dried over Na<sub>2</sub>SO<sub>4</sub>. Evaporation of the solvent gave a residue, which was purified using silica gel chromatography (ethyl acetate/methanol = 9:1) to afford **1i-d<sub>2</sub>** with 93% deuteriation.

### **Kinetic Isotope Effect Experiments**

**Parallel Reactions.** [Cp\*Co(CO)I<sub>2</sub>] (10 mol %, 0.02 mmol, 10 mg), 2-(dimethyl(oxo)-16-sulfaneylidene)-1-(4 methoxyphenyl)ethan-1-one (**1i** or **1i-d<sub>2</sub>**, 0.2 mmol, 50 mg), dimethyl 2-



vinylcyclopropane-1,1-dicarboxylate **2a** (0.3 mmol, 61 mg) and 1,2-DCE (5 mL) were subjected to the standard conditions for 1 h. The reaction was then cooled to room temperature, diluted with ethyl acetate (10 mL) and filtered through a short pad of celite. The solvent was removed under vacuum and purification was performed as described in the general procedure to afford **6ia** and **6ia-d**. The KIE value was determined to be  $P_H/P_D = 1.63$  on the basis of  $^1\text{H}$  NMR analysis (See Scheme 6b).

### Competitive Reactions

A mixture of 2-(dimethyl(oxo)-16-sulfaneylidene)-1-(4-methoxyphenyl)ethan-1-one **1i** (0.25 mmol, 46 mg) and 2-(dimethyl(oxo)-16-sulfaneylidene)-1-(4-methoxyphenyl-2,6-d<sub>2</sub>)ethan-1-one **1i-d<sub>2</sub>** (0.3 mmol, 48 mg) [93% D] was reacted with dimethyl 2-vinylcyclopropane-1,1-dicarboxylate **2a** (0.3 mmol, 165 mg) in 1,2-DCE (8 mL) for 1 h at standard reaction conditions. The reaction mixture was cooled to room temperature, diluted with ethyl acetate (15 mL) and passed through a short pad of celite. Then the solvent was removed under vacuum and the purification was performed as described in the general procedure to afford mixture of **6ia/6ia-d** in 32% yield and the KIE value was determined to be  $P_H/P_D = 1.5$ , based on  $^1\text{H}$  NMR analysis (See Scheme 6b).

### References

1. For preparation of sulfoxonium ylides, see: (a) P. Wang, Y. Xu, J. Sun and X. Li, *Org. Lett.*, 2019, **21**, 8459; (b) J. Lou, Q. Wang, Y.-G. Zhou and Z. Yu, *Org. Lett.*, 2019, **21**, 9217; (c) Y. Kommagalla, S. Ando and N. Chatani, *Org. Lett.*, 2020, **22**, 1375; (d) S. Kumar, S. Nunewar, T. K. Sabbi and V. Kanchupalli, *Org. Lett.*, 2022, **24**, 3395.
2. For preparation of VCPs and vinyl aziridines, see: (a) A. T. Parsons, M. J. Campbell and J. S. Johnson, *Org. Lett.*, 2008, **10**, 2541; (b) P. D. Pohlhaus, S. D. Sanders, A. T. Parsons, W. Li and J. S. Johnson, *J. Am. Chem. Soc.*, 2008, **130**, 8642; (c) A. P. Dieskau, M. S. Holzwarth and B. Plietker, *J. Am. Chem. Soc.*, 2012, **134**, 5048; (d) T. H. Meyer, W. Liu, M. Feldt, A. Wuttke, R. A. Mata and L. Ackermann, *Chem.-Eur. J.*, 2017, **23**, 5443; (e) Q. Lu, F. J. R. Klauck and F. Glorius, *Chem. Sci.*, 2017, **8**, 3379; (f) M. M. Littleson, C. M. Baker, A. J. Dalençon, E. C. Frye, C. Jamieson, A. R. Kennedy, K. B. Ling, M. M. McLachlan, M. G. Montgomery, C. J. Russell and A. J. B. Watson, *Nat. Commun.*, 2018, **9**, 1105; (g) Q. Wang, C.-L. Zhi, P.-P. Lu, S. Liu, X. Zhu, X.-Q. Hao and M.-P. Song, *Adv. Synth. Catal.*, 2019, **361**, 1253; (h) F. Wei, C.-L. Ren, D. Wang and L. Liu, *Chem.-Eur. J.*, 2015, **21**, 2335; (i) L. Kong, B. Biletskyi, D. Nuel and H. Clavier, *Org. Chem. Front.*, 2018, **5**, 1600.
3. For post synthetic modifications, see: (a) N. Kumar, A. Sharma, U. Kumar and S. K. Pandey, *J. Org. Chem.*, 2023, **88**, 6120; (b) Q. Jia, L. Kong and X. Li, *Org. Chem. Front.*,

2019, 6, 741; (c) L. Fang, S. Fan, W. Wu, T. Li and J. Zhu, *Chem. Commun.*, 2021, 57, 7386.

## NMR ( $^1\text{H}$ , $^{13}\text{C}$ , $^{19}\text{F}$ and NOESY) and HPLC Spectra

SJT-135-P-1H

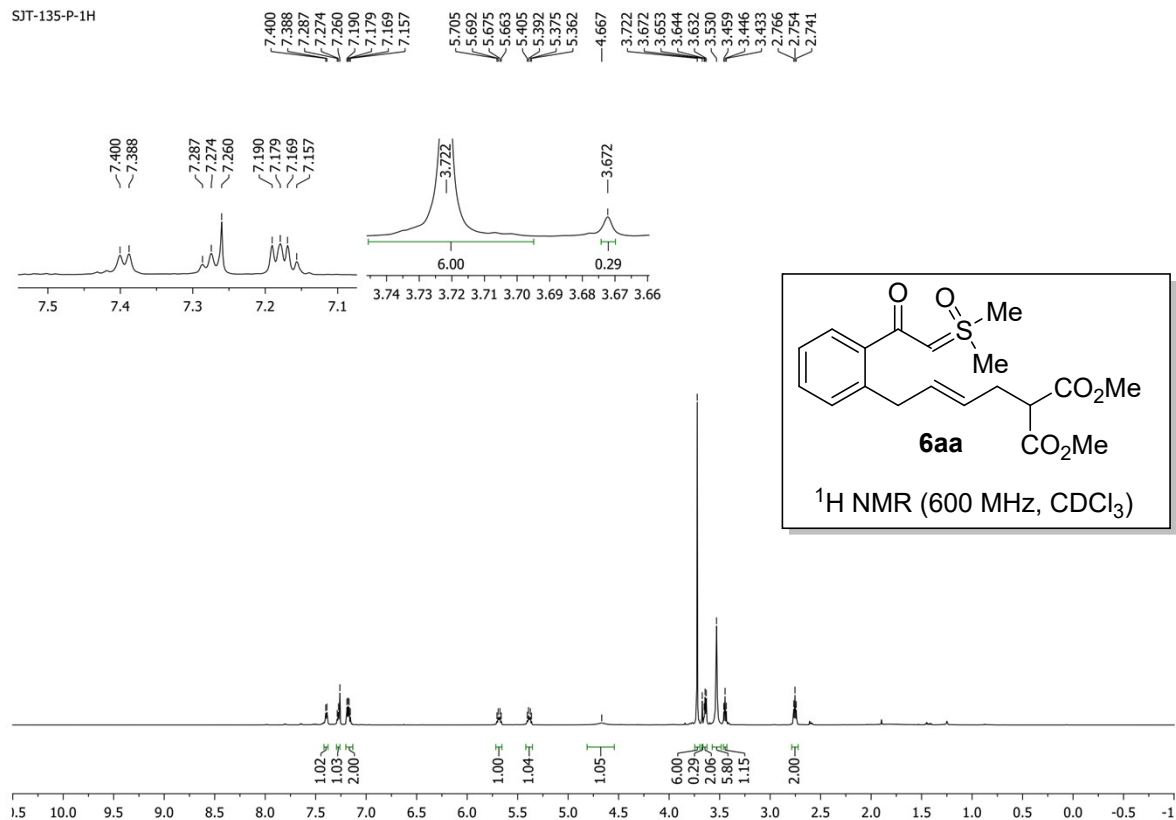

SJT-135-P-13C

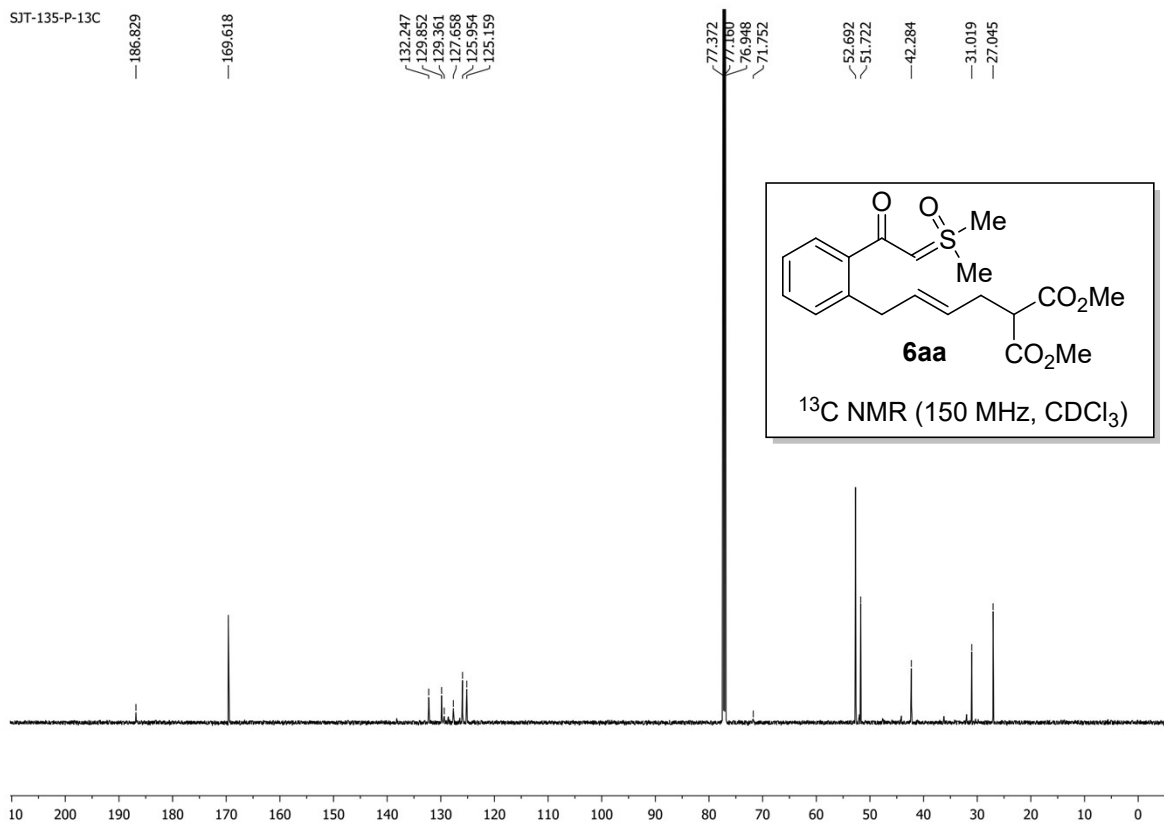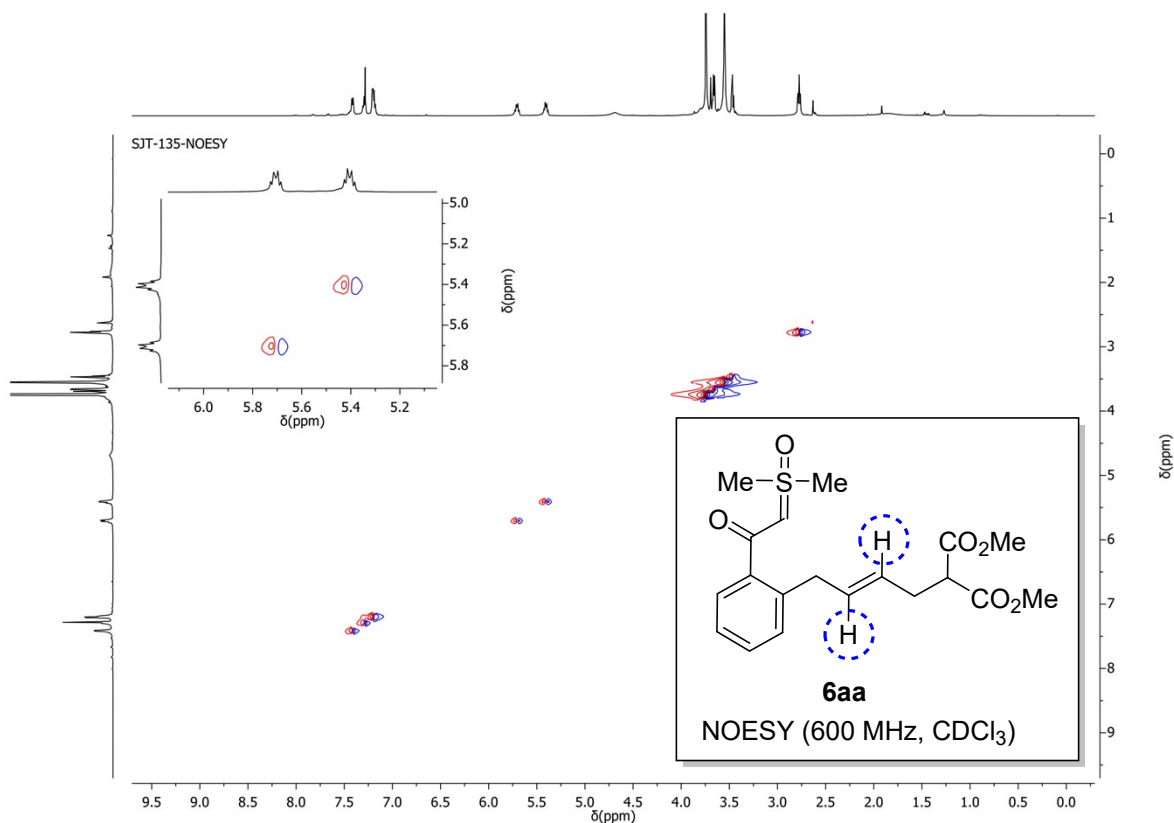

SJT-226-P-1H

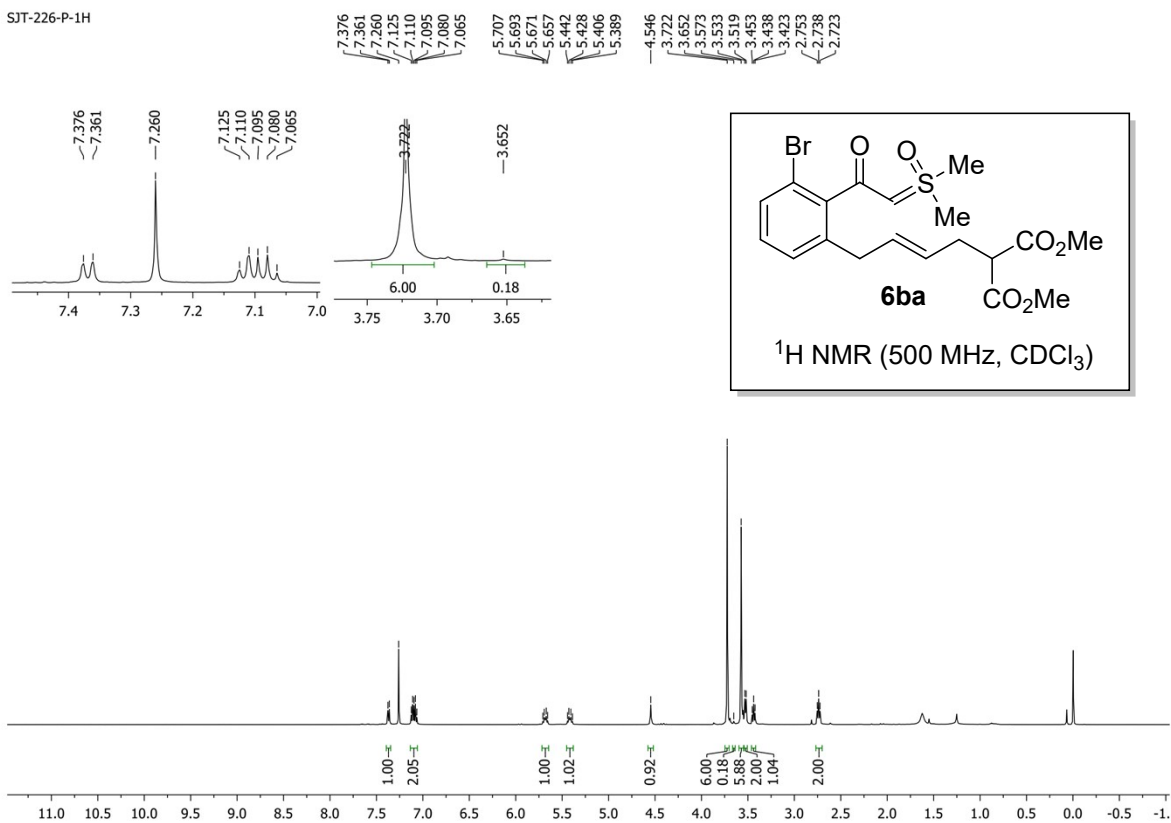

SJT-226-P-13C

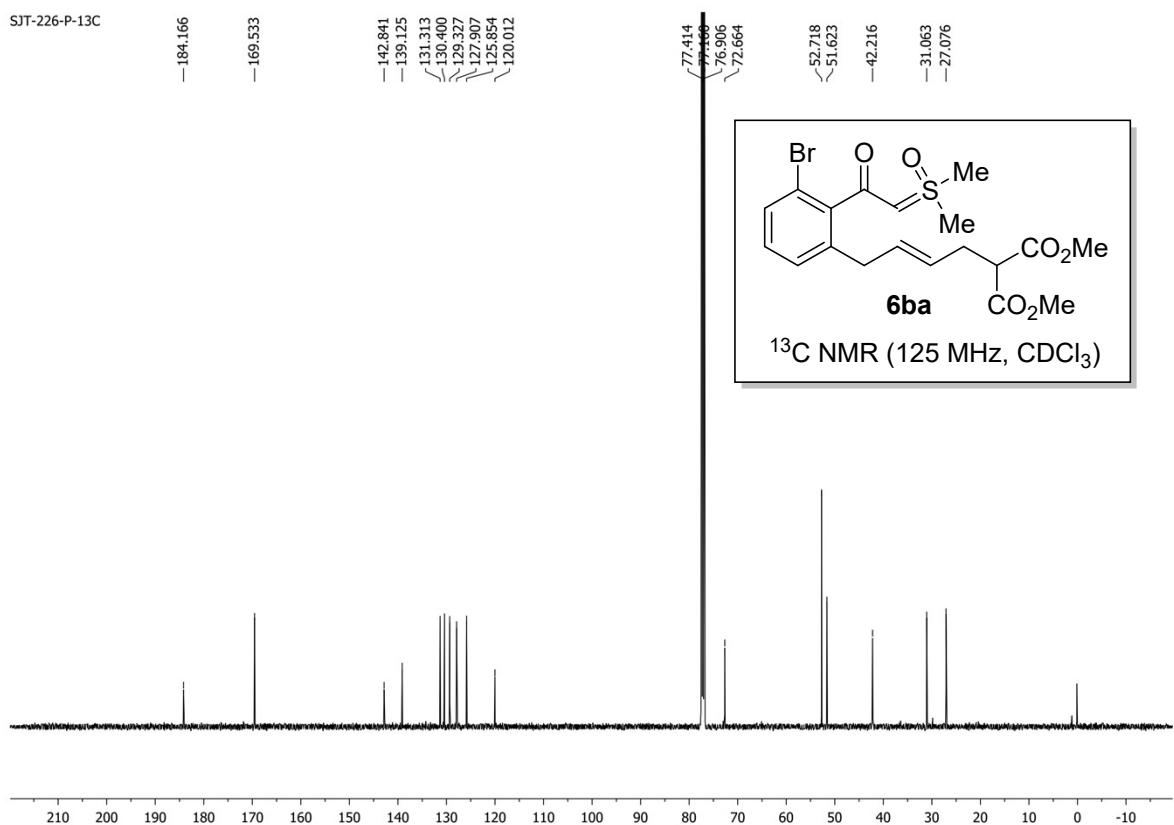

SJT-176-P-1H

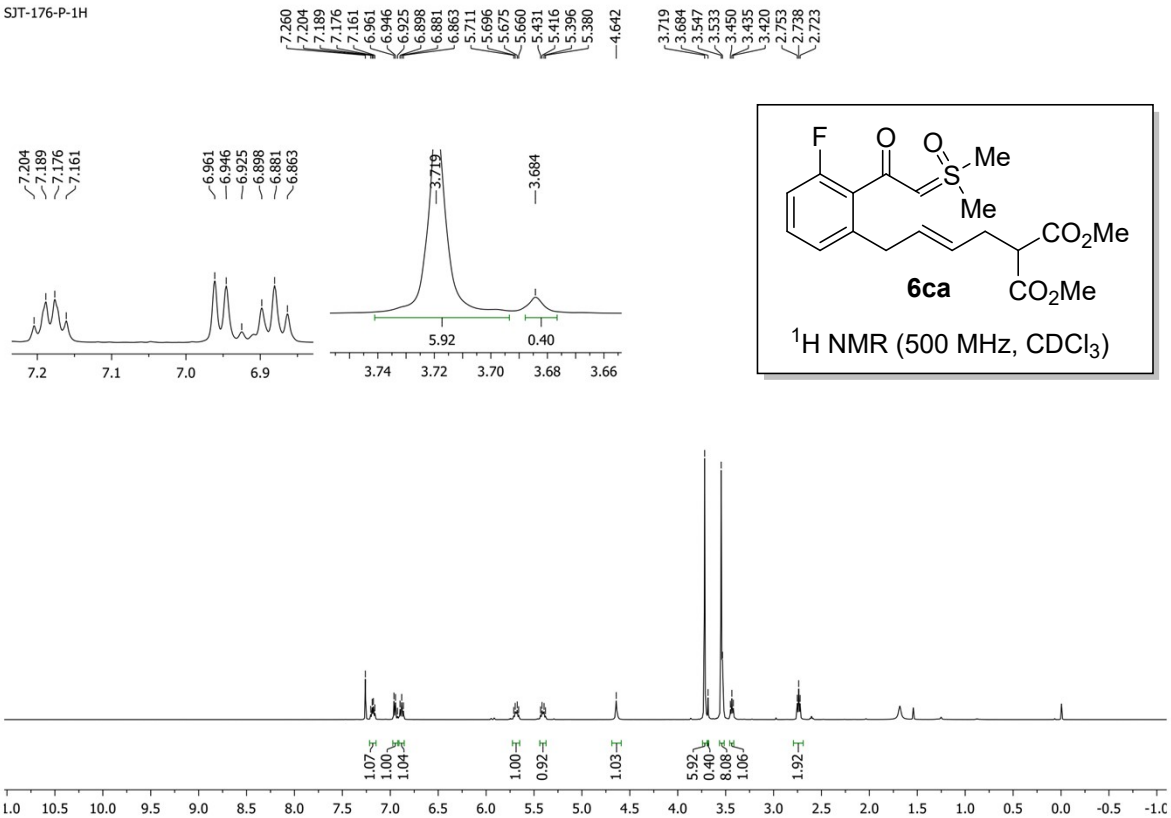

SJT-176-P-13C

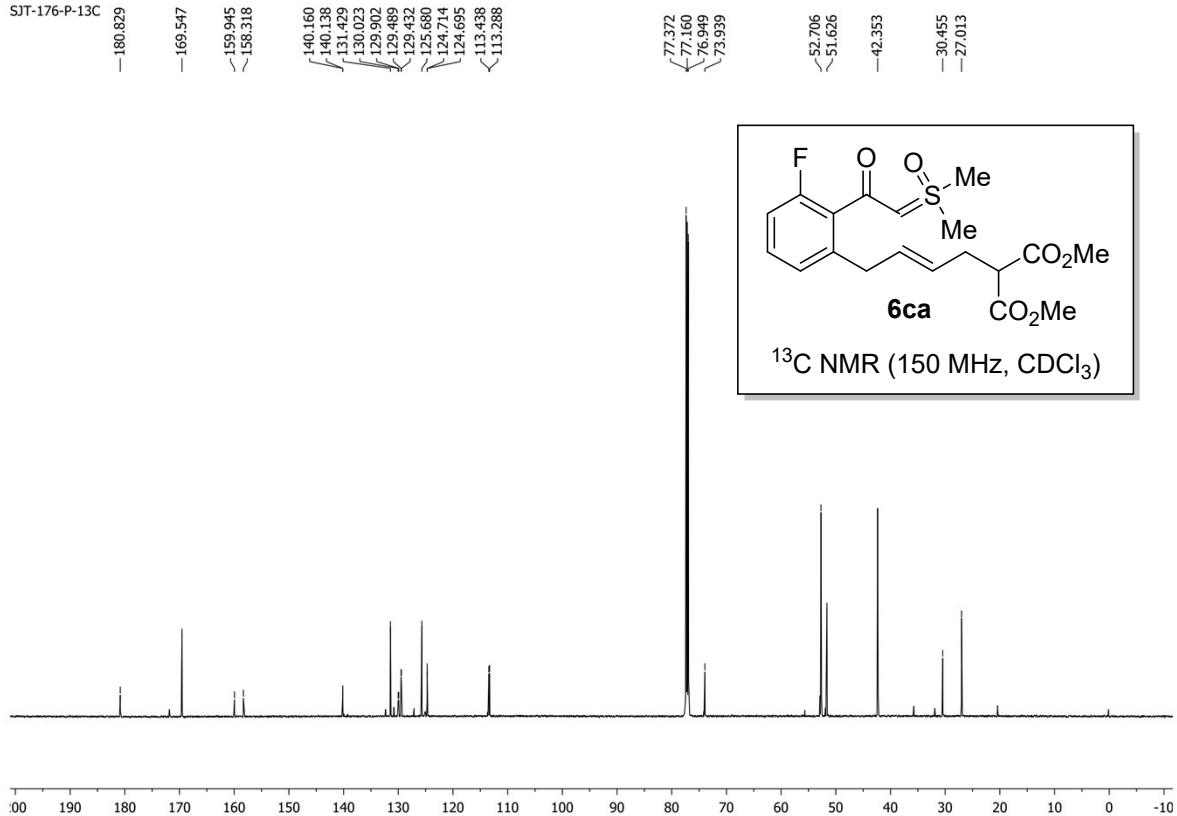

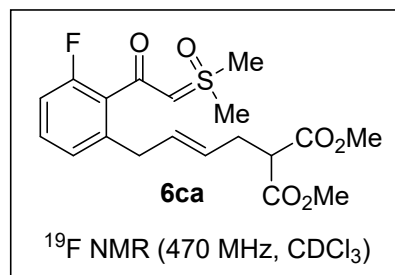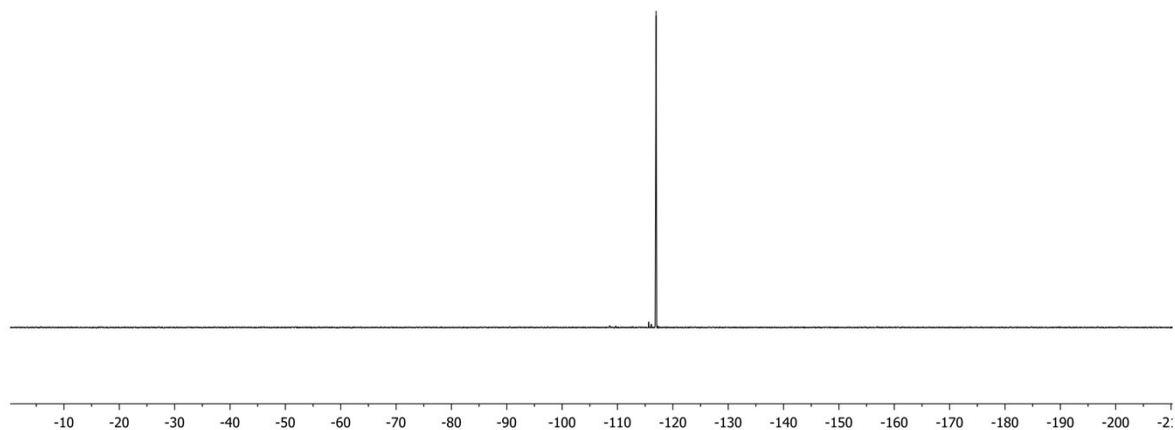

SJT-261-P-1H

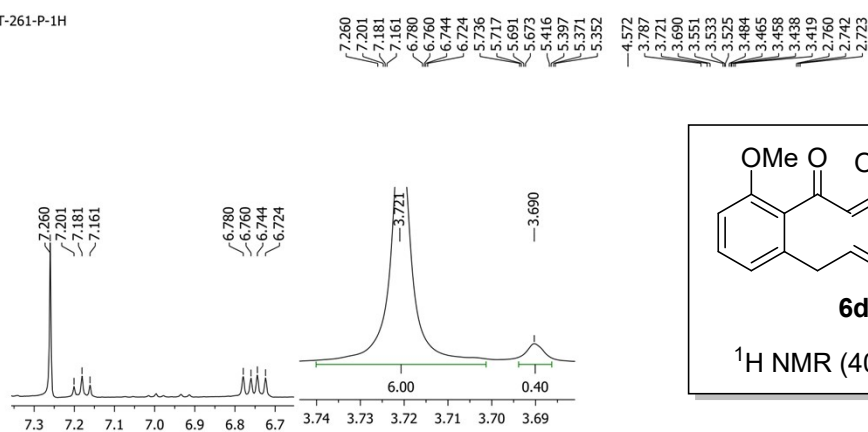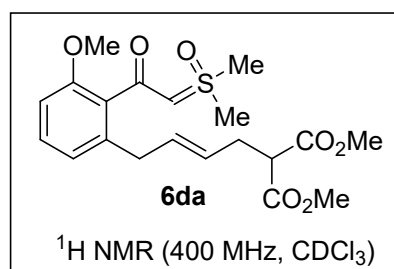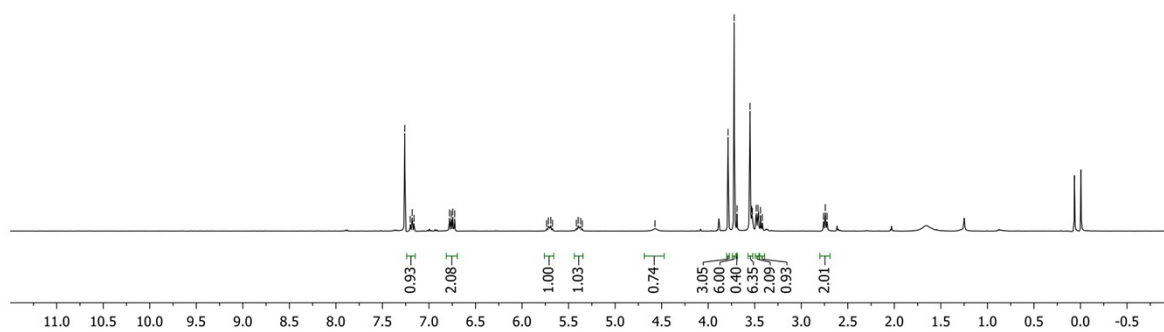

SJT-261-P-13C

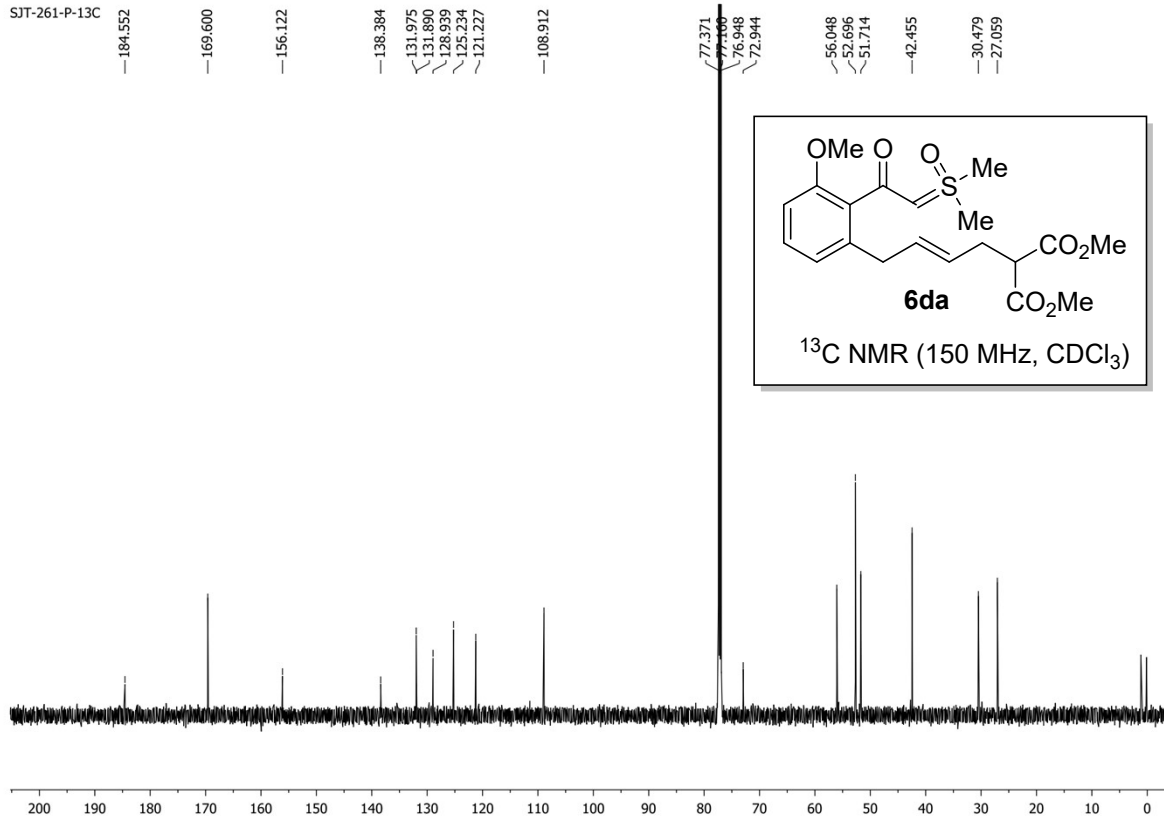

SJT-233-P-1H

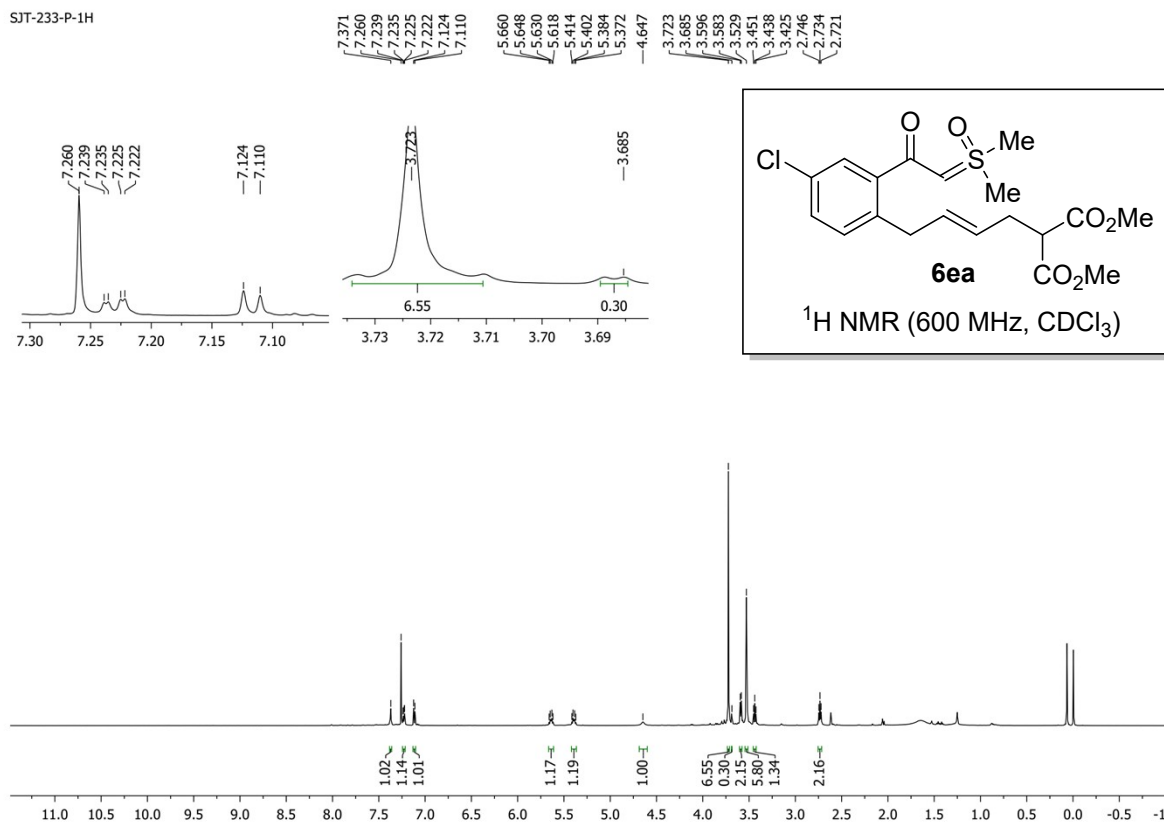

SJT-233-P-13C

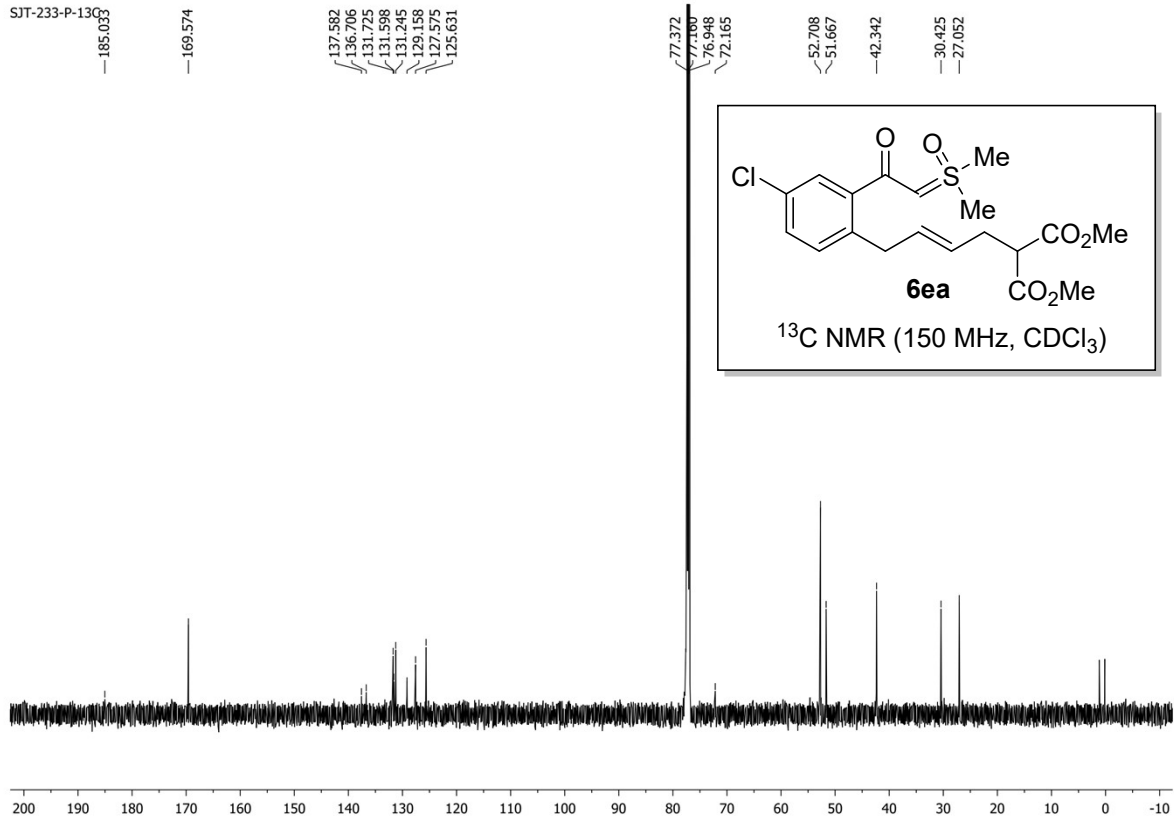

SJT-174-P-1H

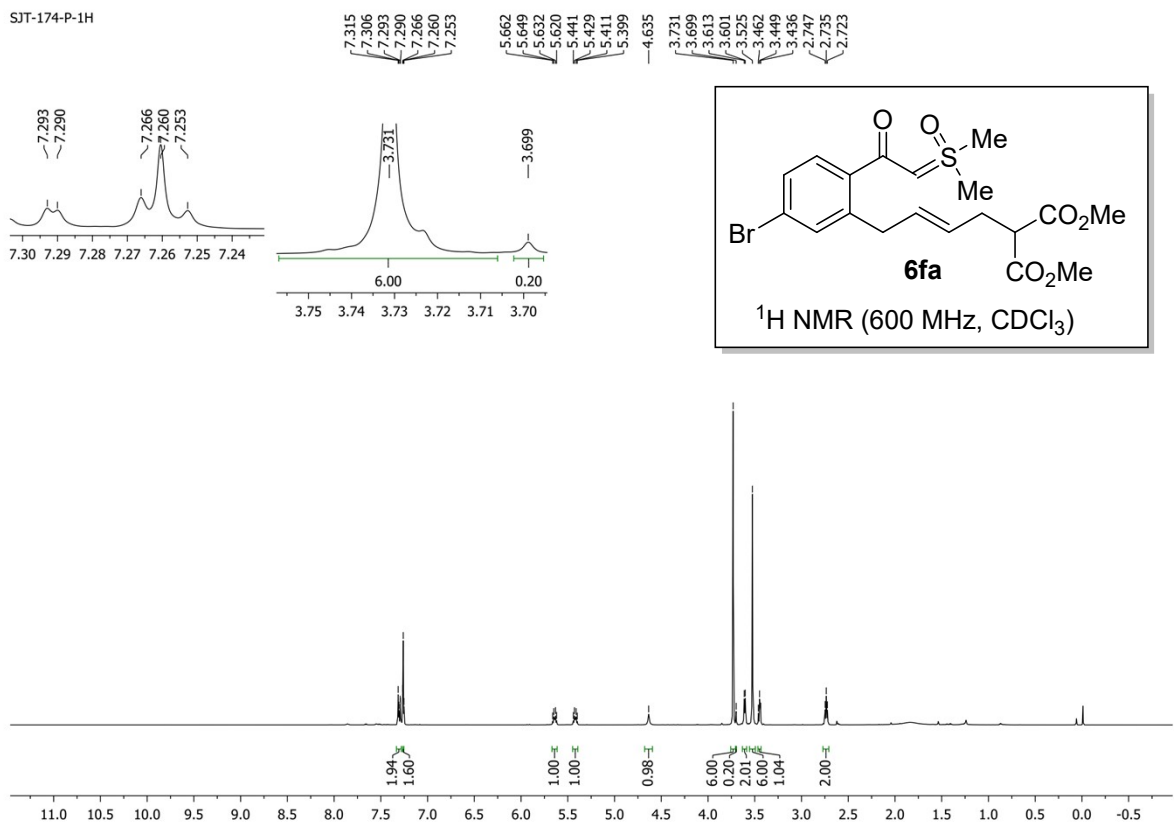



SJT-174-P-13C

—185.543

—169.581

140.506  
 139.860  
 132.629  
 131.337  
 129.161  
 128.971  
 125.895  
 123.313

77.372  
 77.160  
 76.948  
 72.134

52.803  
 51.568

—42.229

30.655  
 26.988

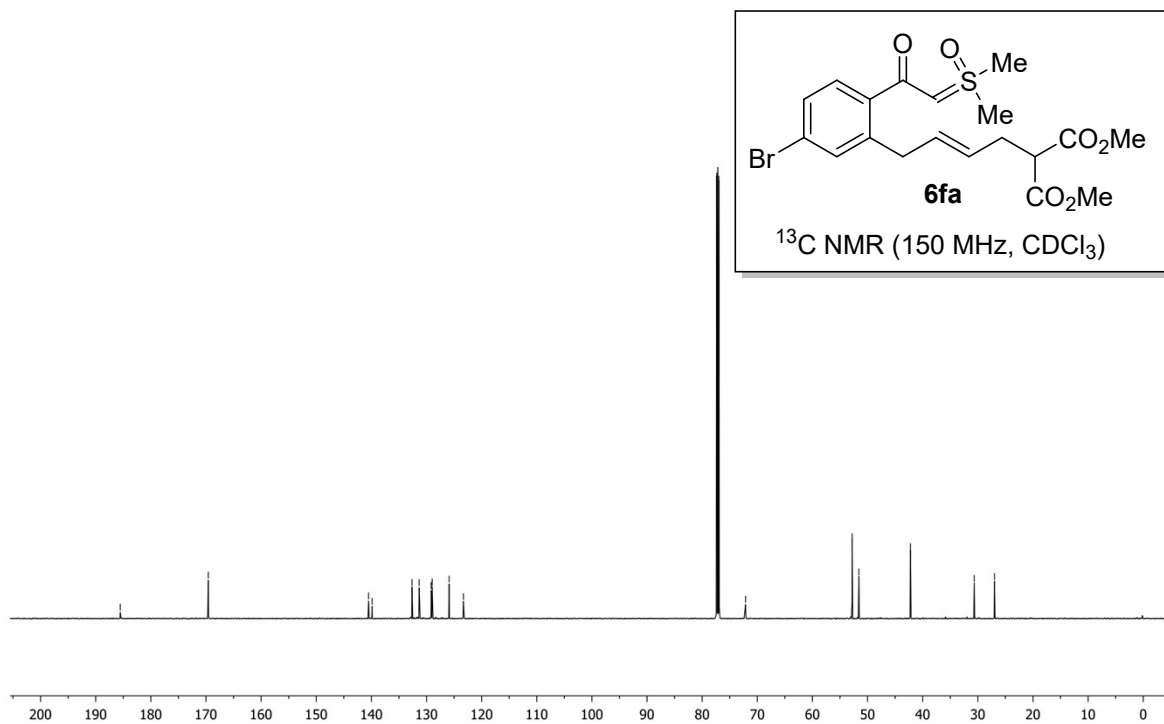

SJT-207-P-1H

7.340  
 7.324  
 7.260  
 7.164  
 7.152  
 7.136

5.675  
 5.660  
 5.639  
 5.625  
 5.452  
 5.437  
 5.417  
 5.402  
 4.632  
 3.734  
 3.702  
 3.630  
 3.615  
 3.524  
 3.515  
 3.465  
 3.450  
 3.441  
 3.435  
 2.756  
 2.742  
 2.726

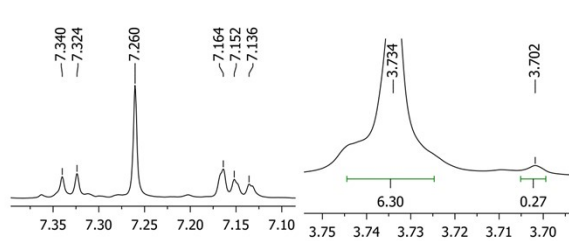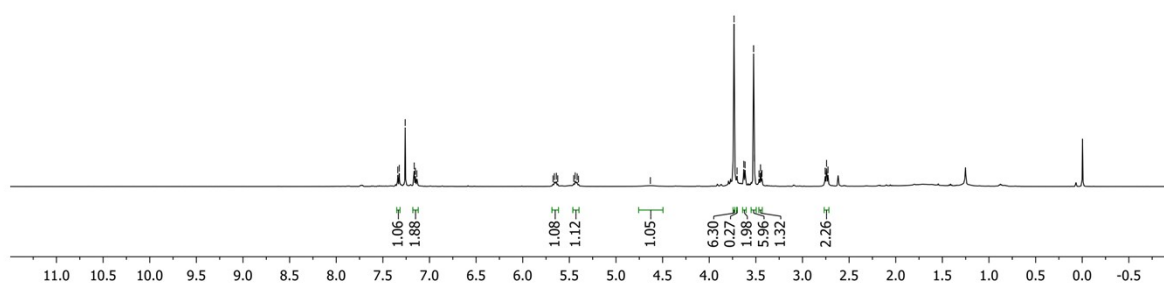

SJT-207-P-13C

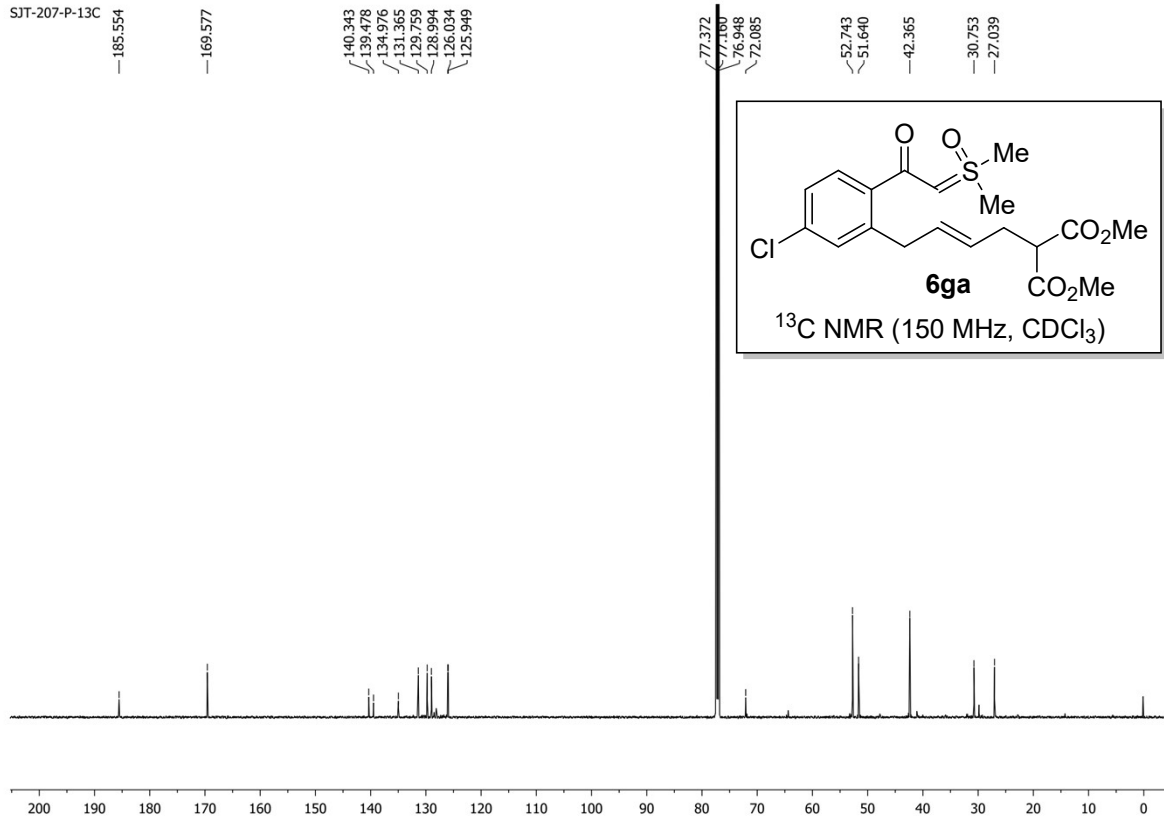

SJT-197-P-1H

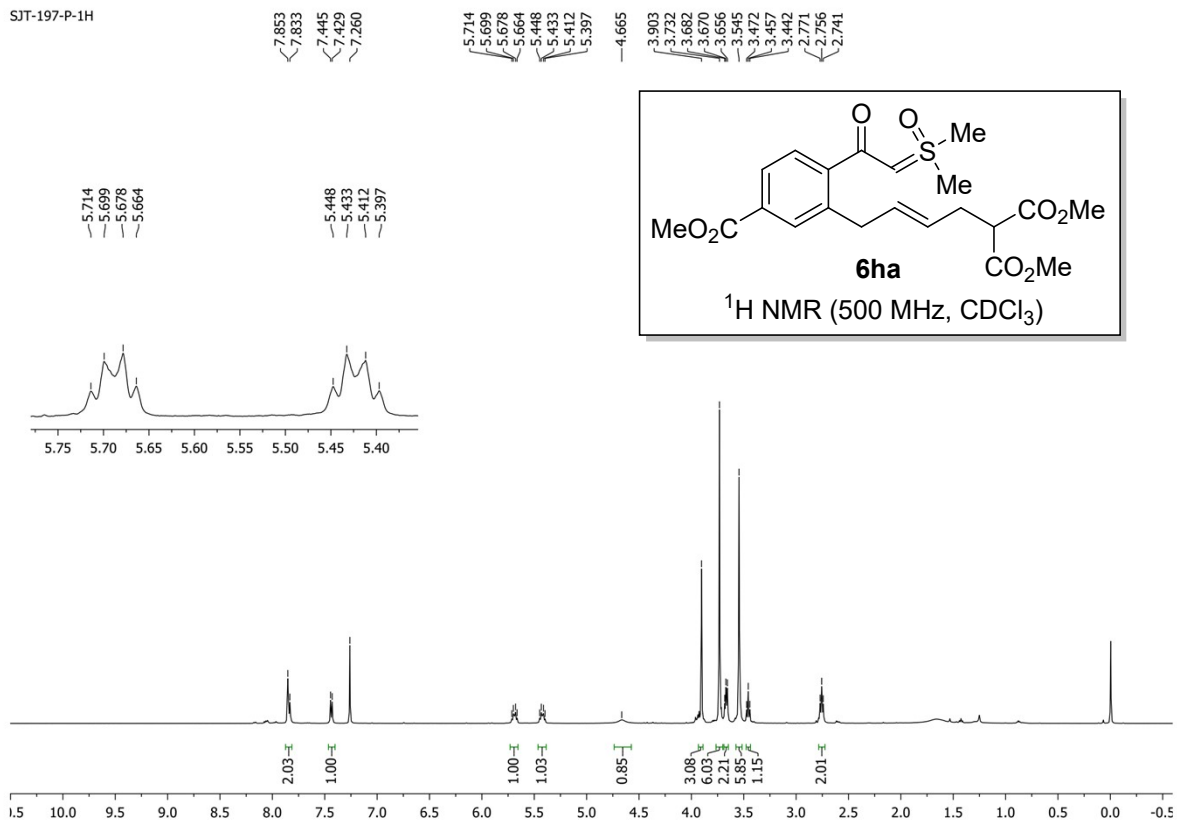

SJT-197-P-13C

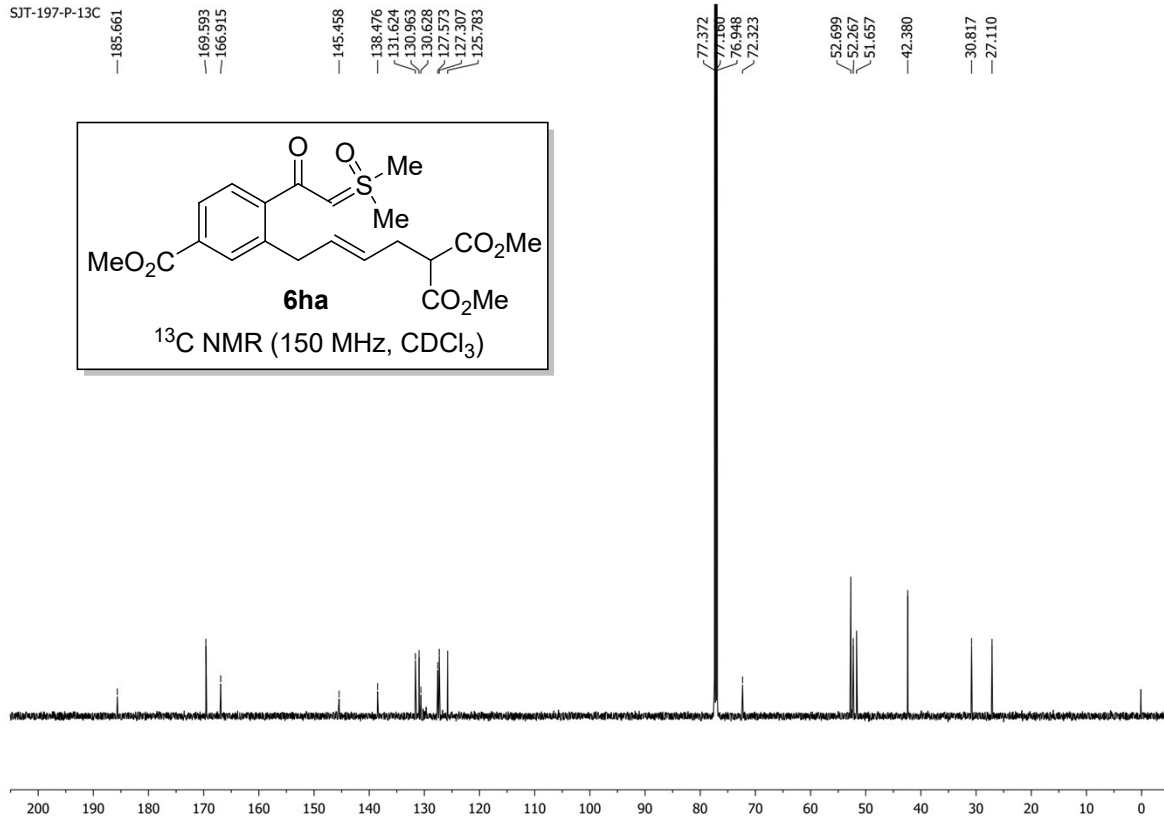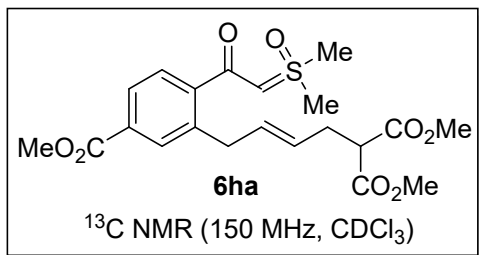

Auto-Scaled Chromatogram

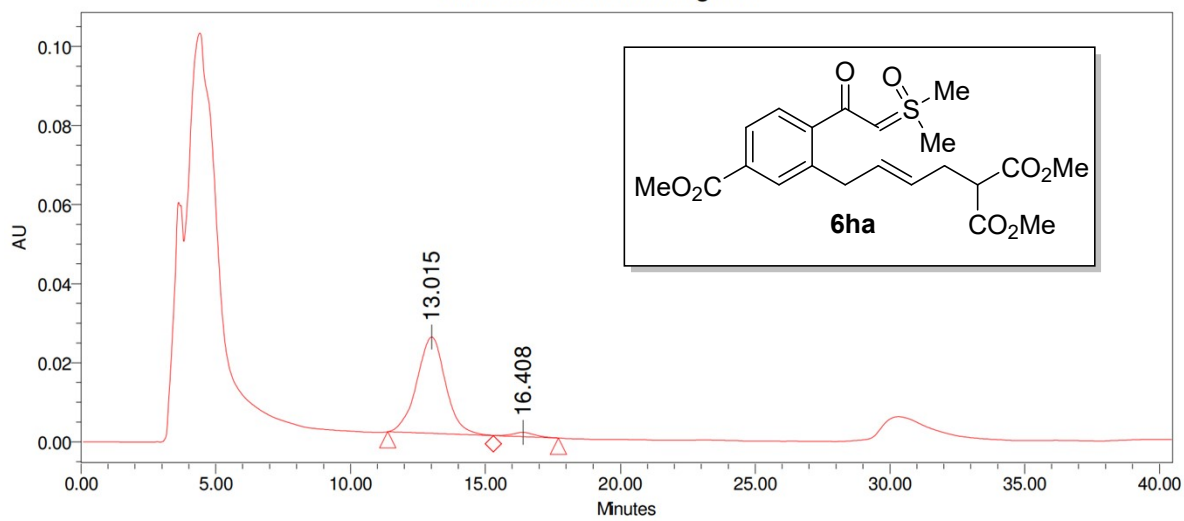

Peak Results

|   | Start Time (min) | End Time (min) | RT     | Height (μV) | % Area |
|---|------------------|----------------|--------|-------------|--------|
| 1 | 11.383           | 15.300         | 13.015 | 24339       | 96.56  |
| 2 | 15.300           | 17.717         | 16.408 | 1110        | 3.44   |

SJT-261-P-Para-1H

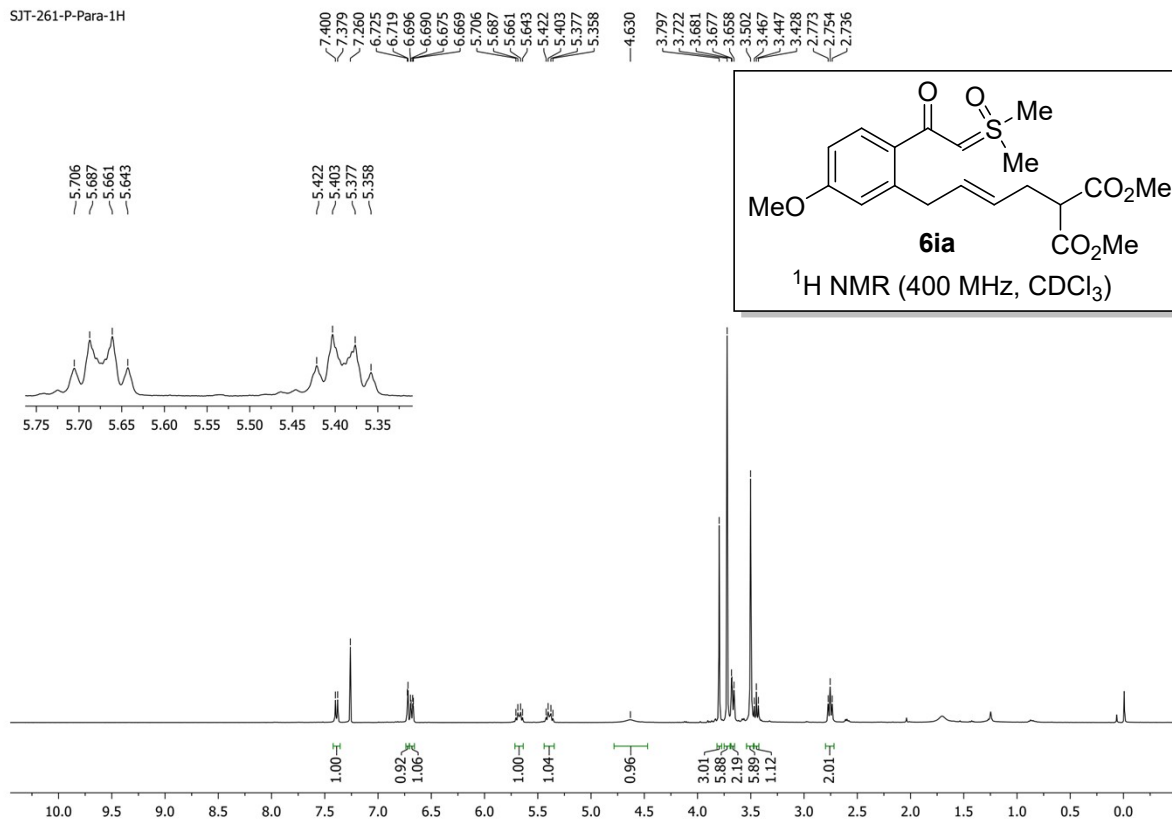

SJT-261-P-Para-13C

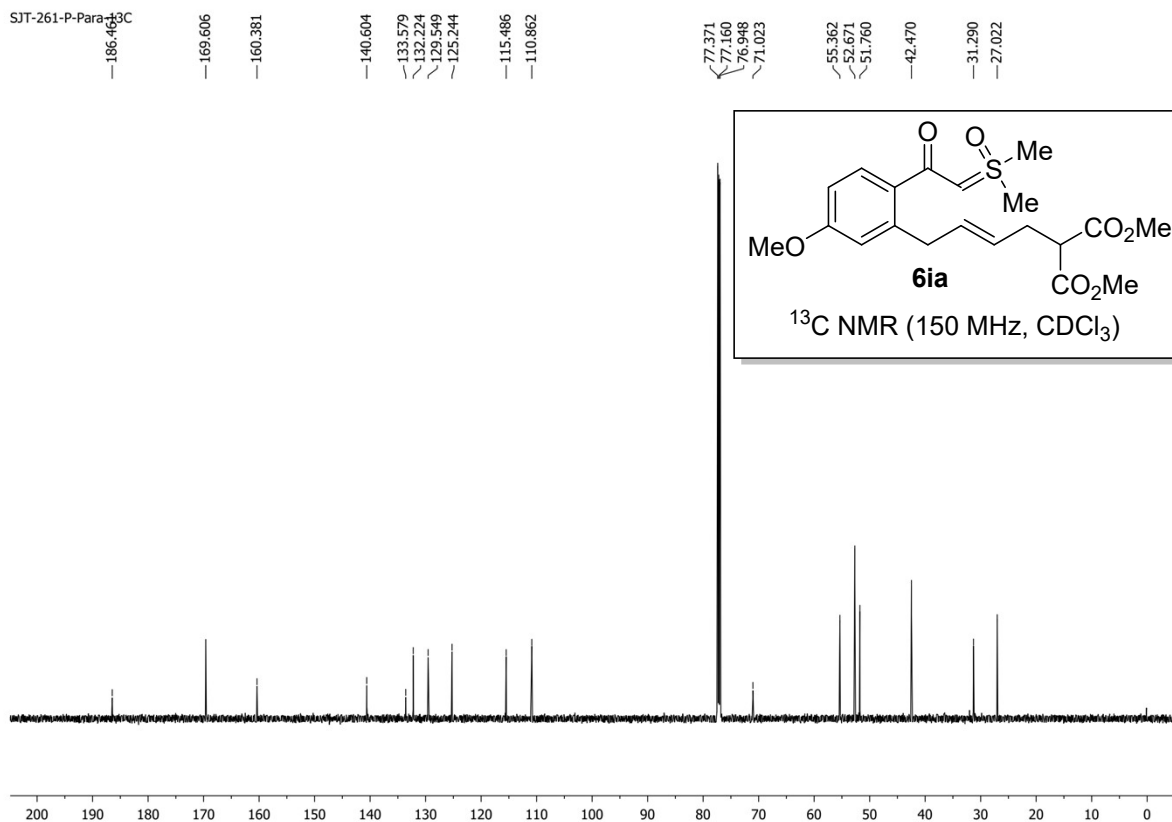

SJT-210-P-1H

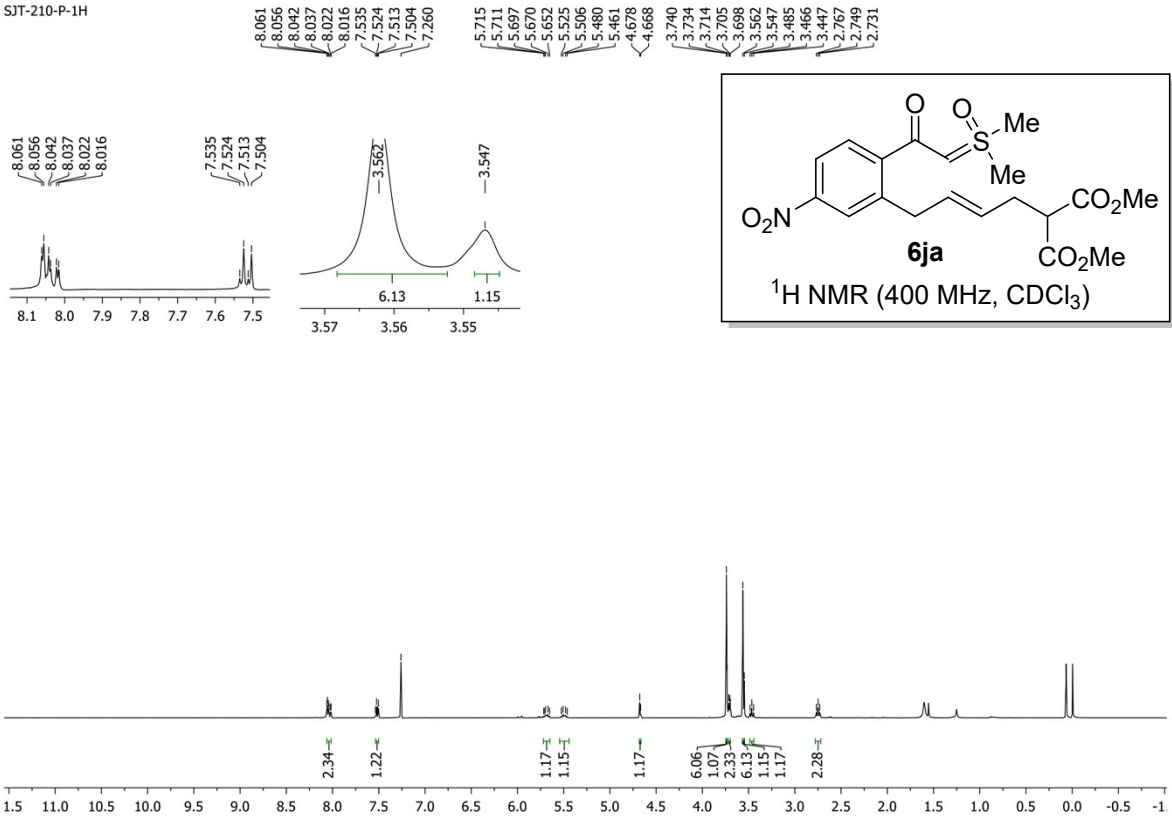

SJT-210-P-13C

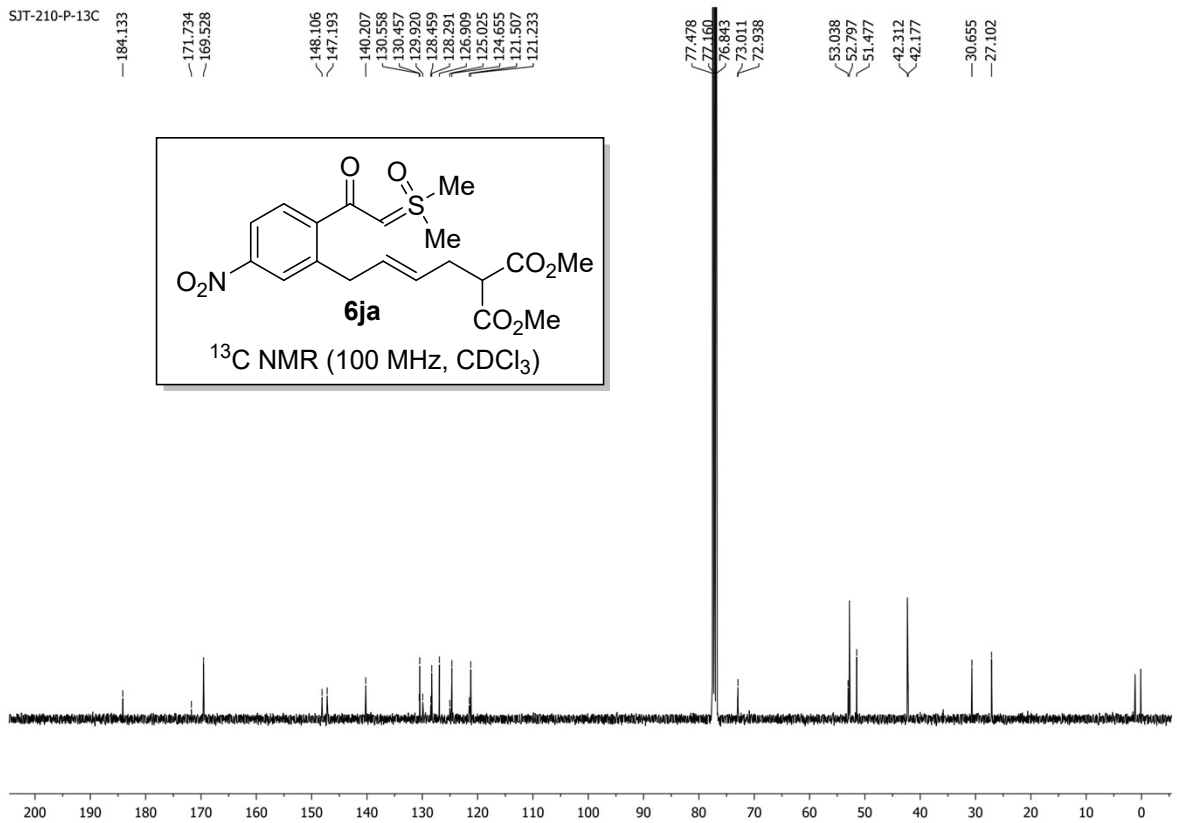

SJT-175-P-1H

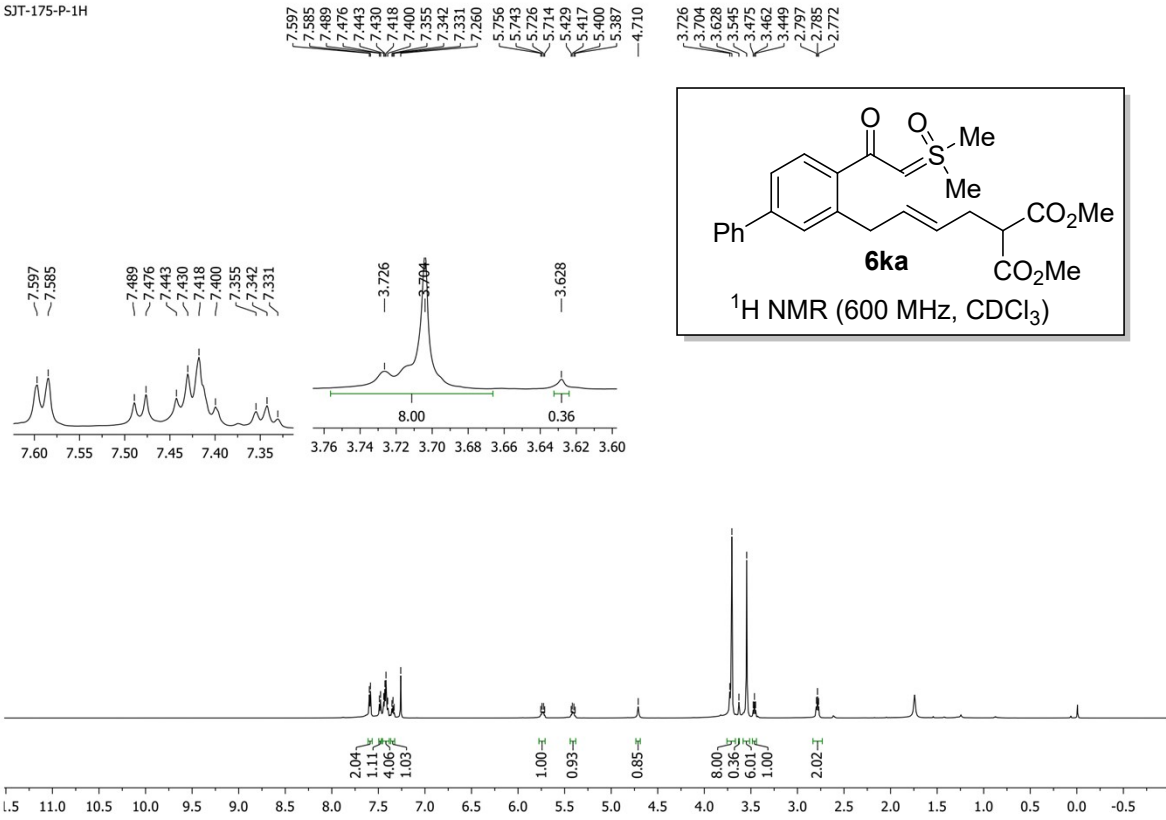

SJT-175-P-13C

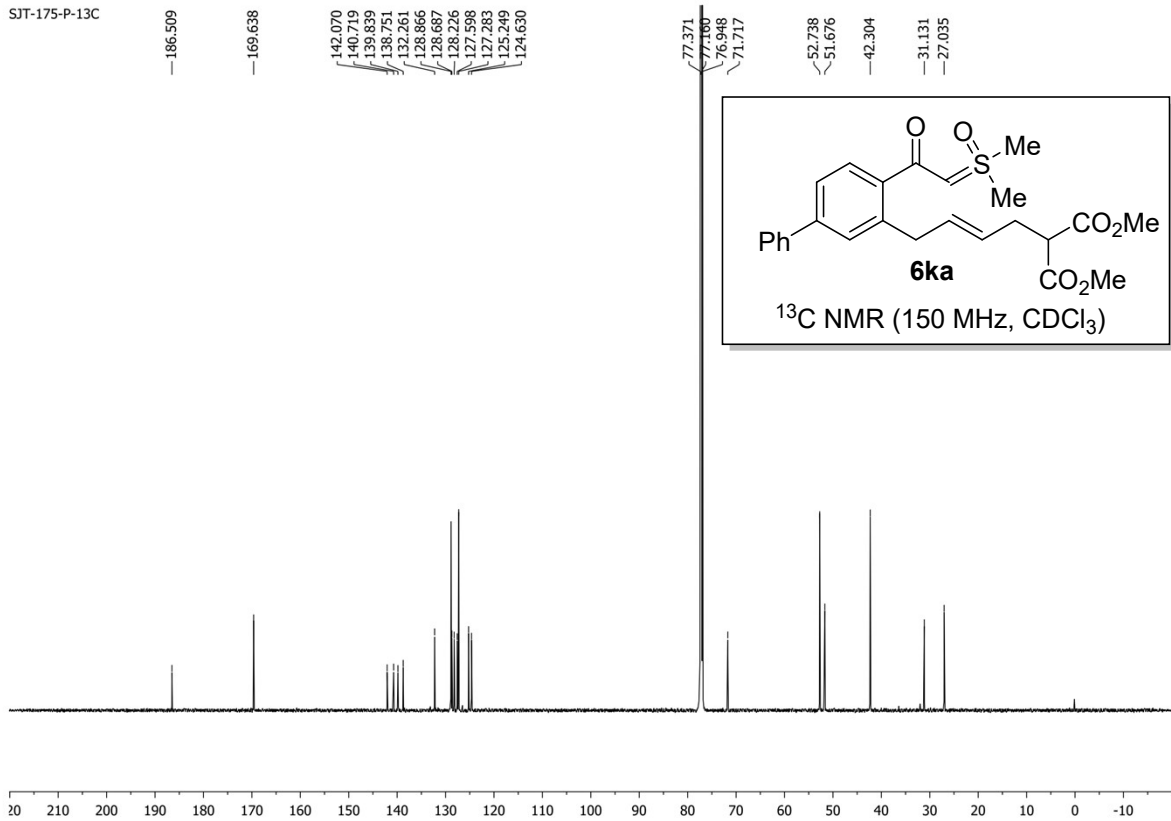

SJT-211-P-1H

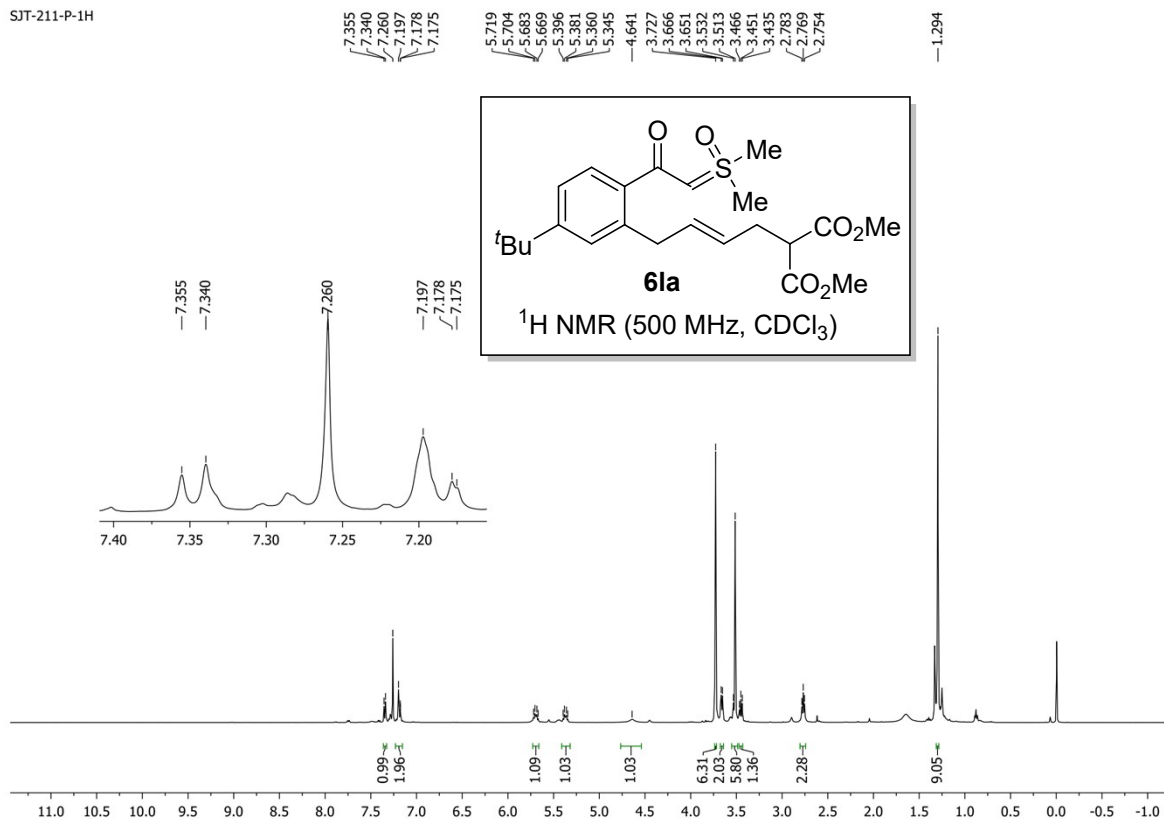

SJT-211-P-13C

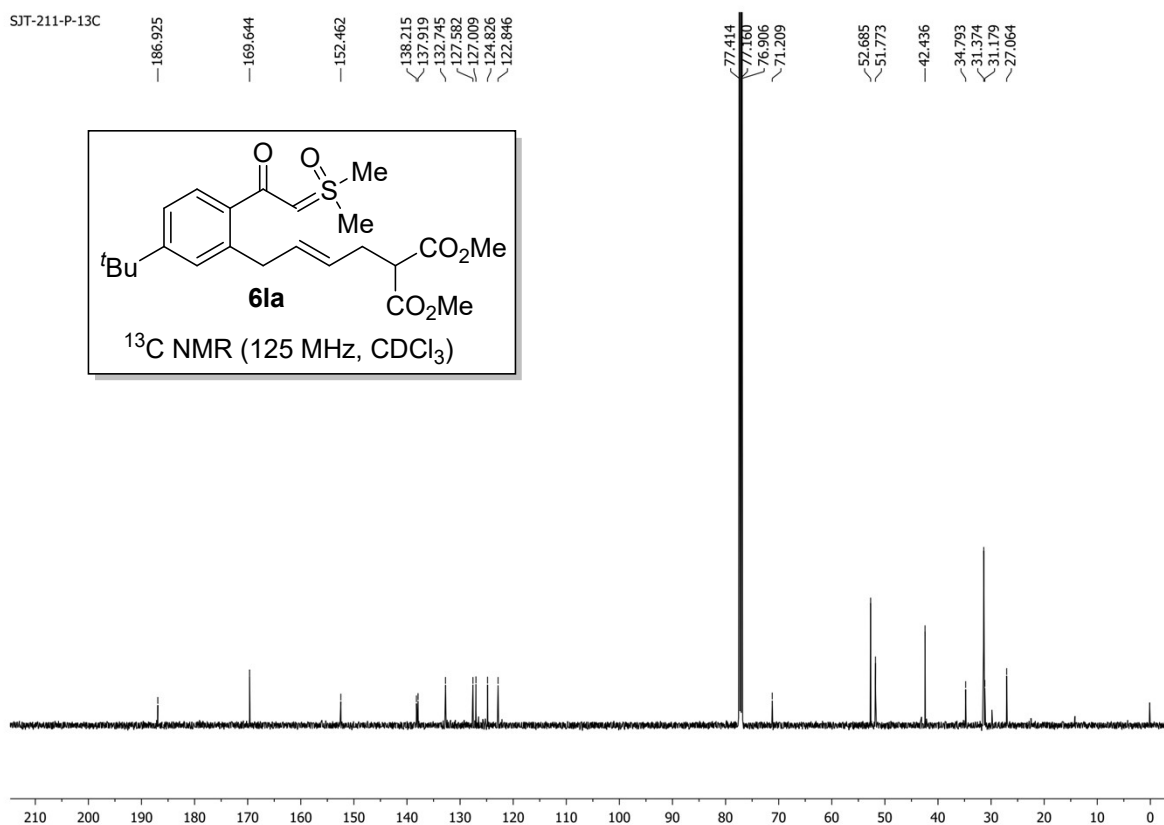

Auto-Scaled Chromatogram

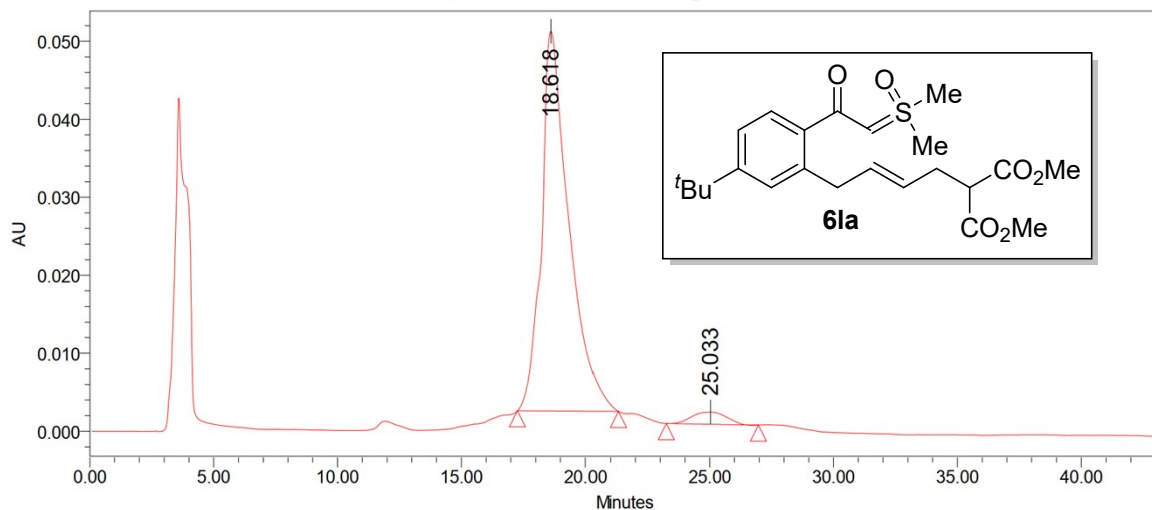

Peak Results

|   | Start Time (min) | End Time (min) | RT     | Height (μV) | % Area |
|---|------------------|----------------|--------|-------------|--------|
| 1 | 17.267           | 21.317         | 18.618 | 48679       | 96.13  |
| 2 | 23.250           | 26.967         | 25.033 | 1558        | 3.87   |

SJT-196-P-1H

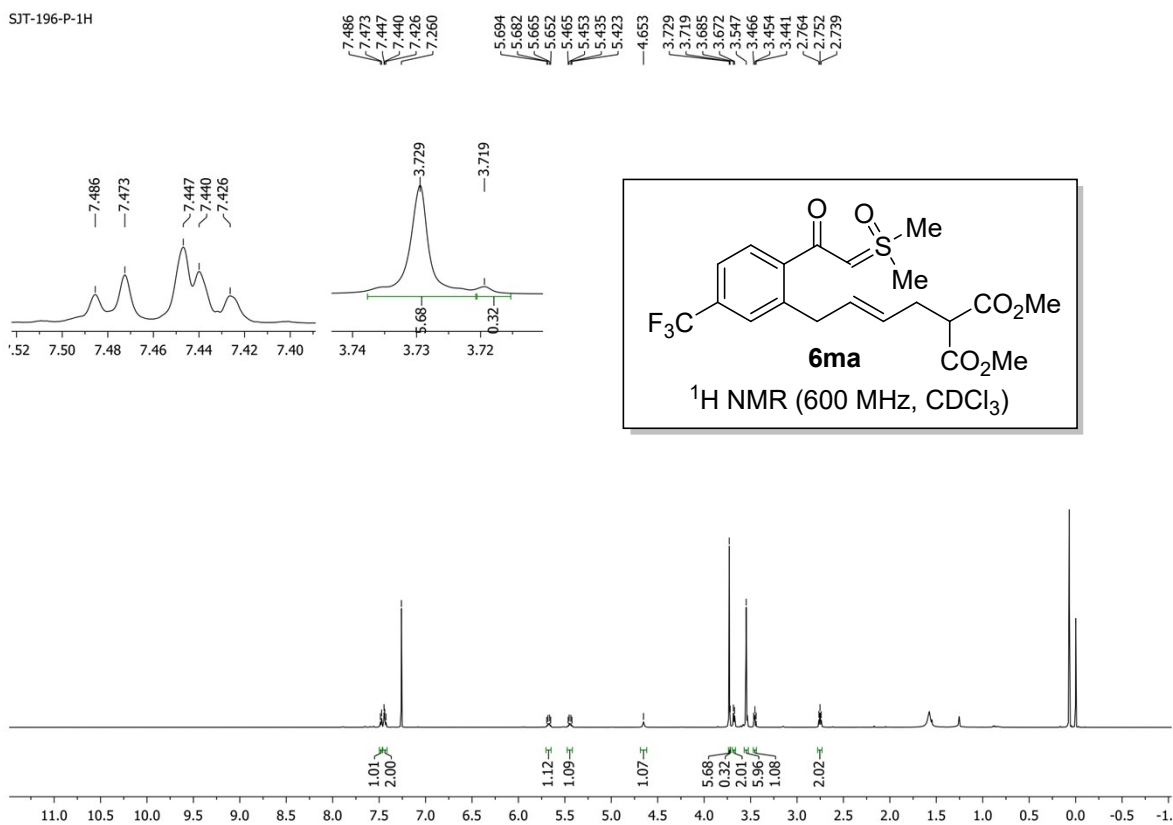



SJT-196-P-13C

—185.211

—169.560

—144.577

—139.084

—131.408

—131.204

—131.173

—130.961

—127.832

—127.806

—126.605

—126.580

—126.555

—126.535

—126.198

—126.176

—122.913

—122.887

—77.371

—77.100

—76.948

—72.318

—52.712

—51.586

—42.382

—30.795

—27.088

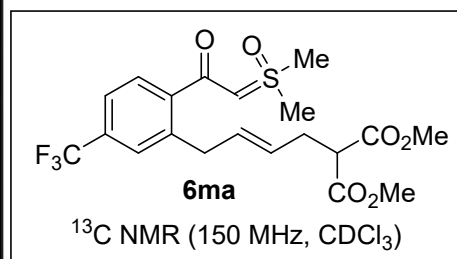

SJT-196-P-19F

—62.618

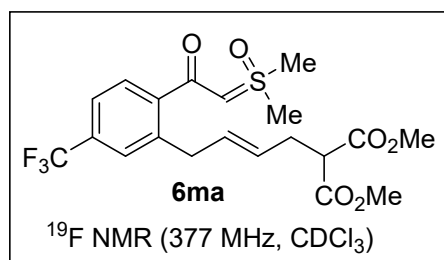

0 -10 -20 -30 -40 -50 -60 -70 -80 -90 -100 -110 -120 -130 -140 -15

Auto-Scaled Chromatogram

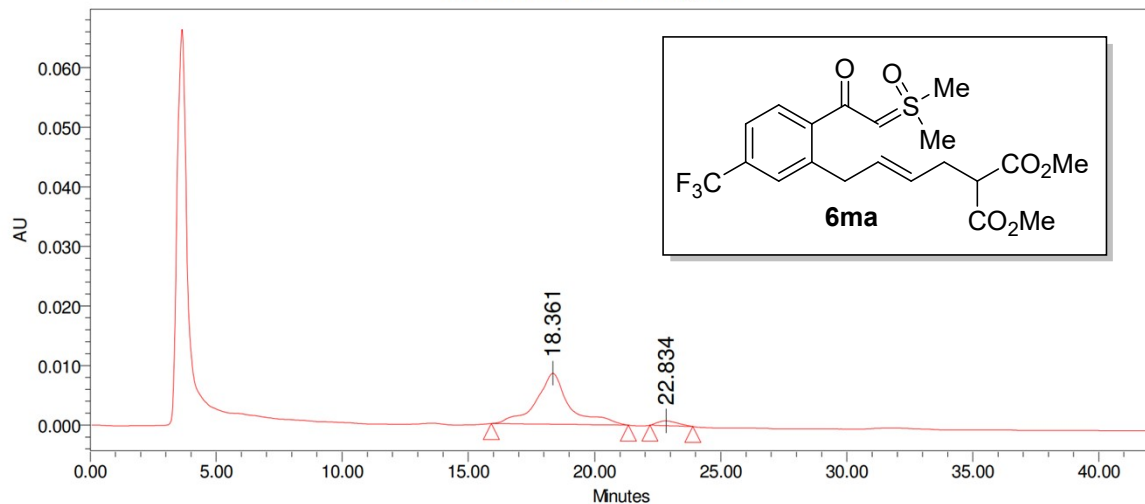

Peak Results

|   | Start Time (min) | End Time (min) | RT     | Height (μV) | % Area |
|---|------------------|----------------|--------|-------------|--------|
| 1 | 15.917           | 21.333         | 18.361 | 8547        | 94.58  |
| 2 | 22.183           | 23.883         | 22.834 | 794         | 5.42   |

SJT-220-P-1H

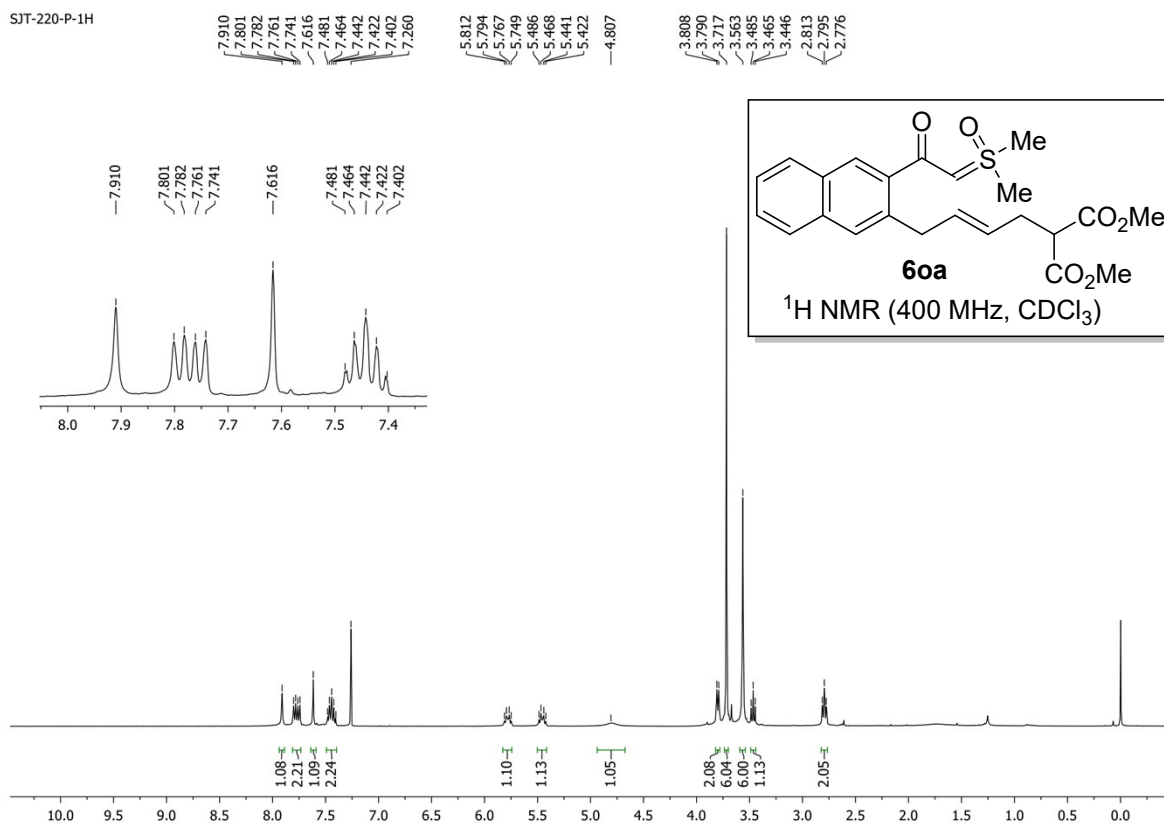

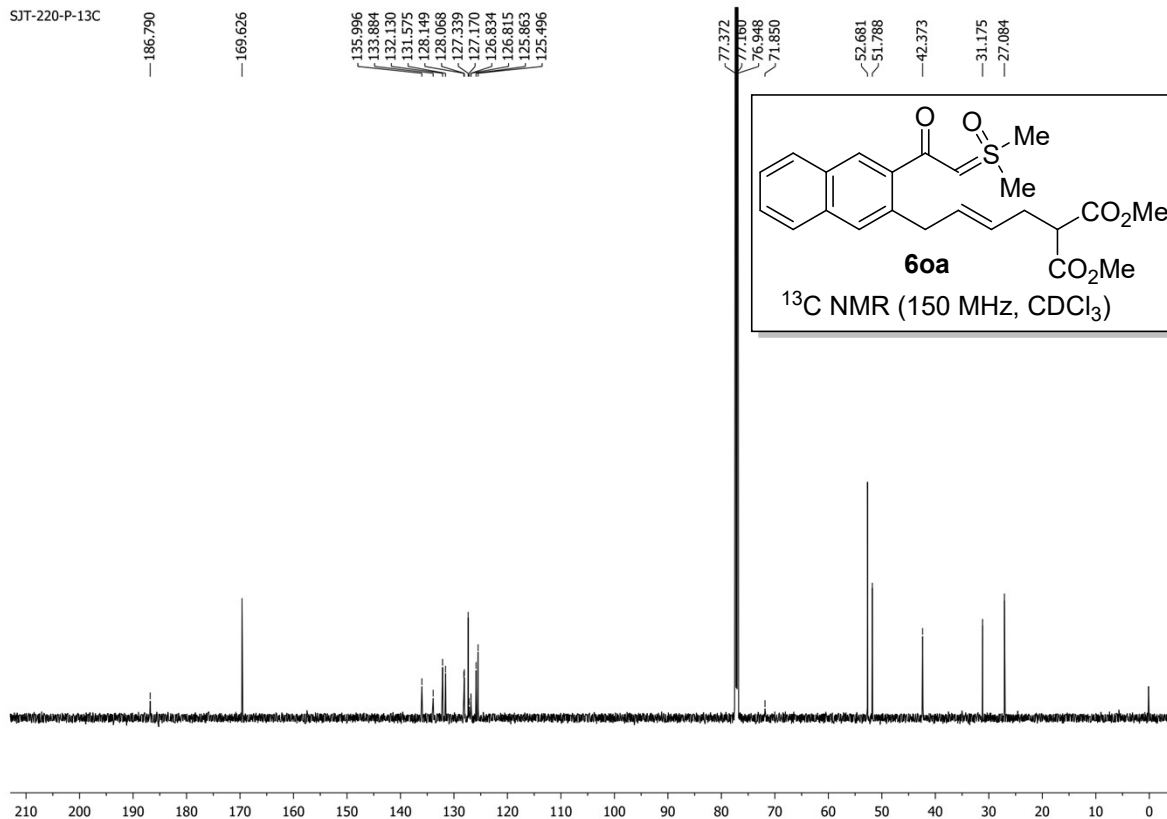

## Auto-Scaled Chromatogram

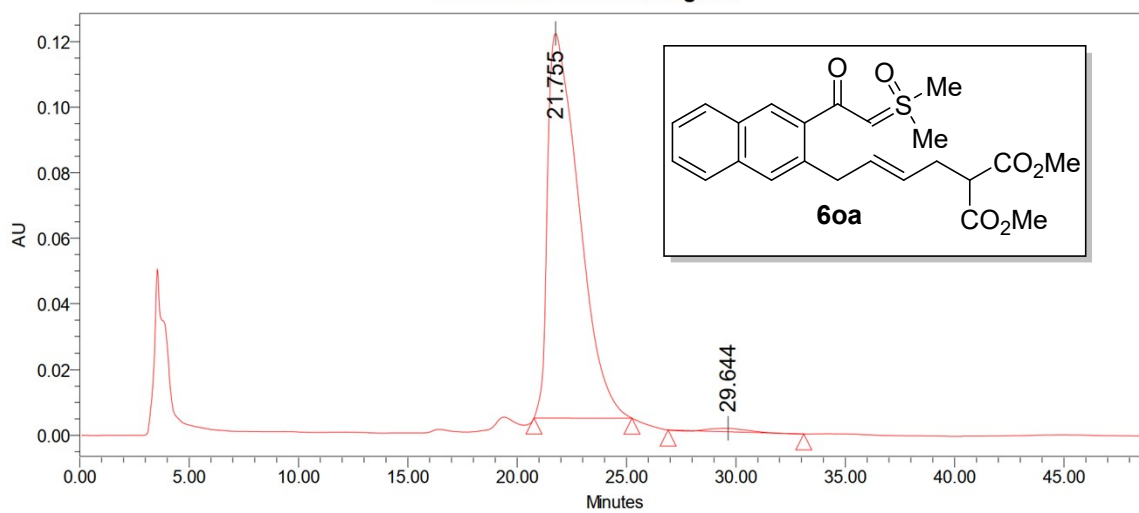

## Peak Results

|   | Start Time (min) | End Time (min) | RT     | Height ( $\mu\text{V}$ ) | % Area |
|---|------------------|----------------|--------|--------------------------|--------|
| 1 | 20.767           | 25.250         | 21.755 | 117230                   | 98.86  |
| 2 | 26.900           | 33.100         | 29.644 | 1059                     | 1.14   |

SJT-223-P-1H

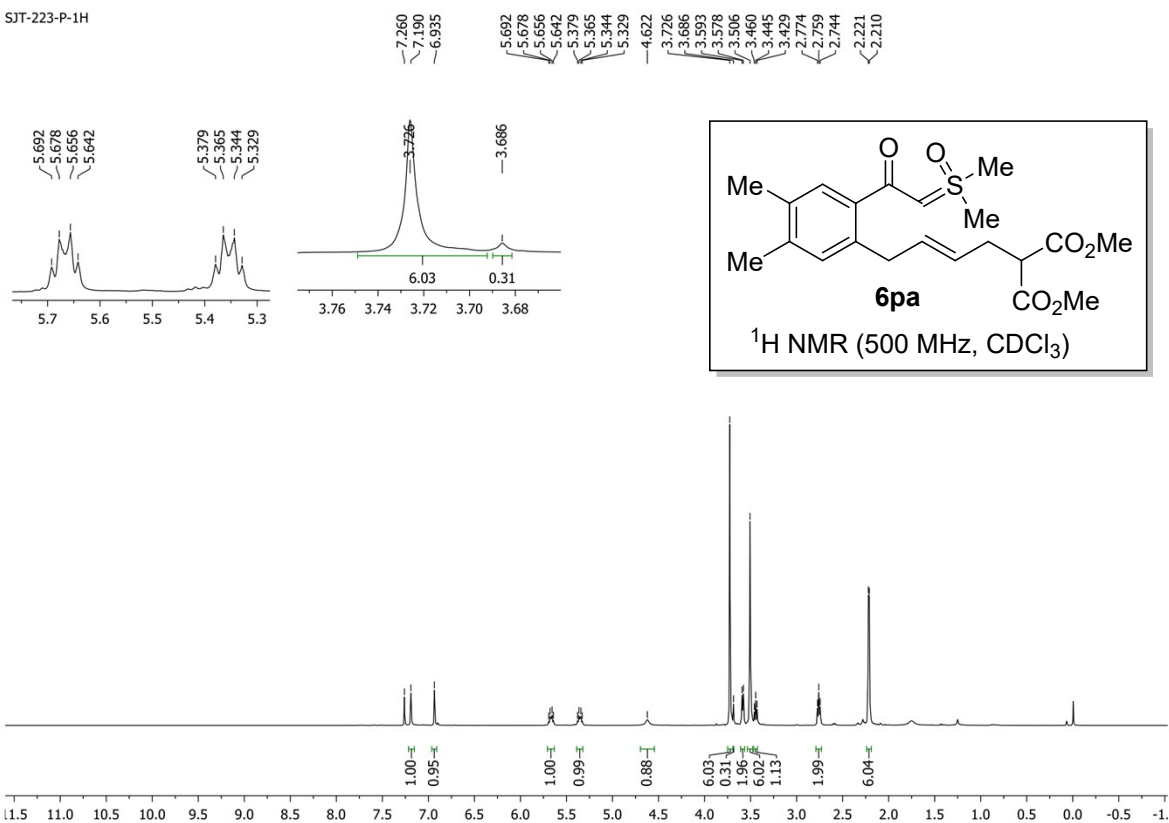

SJT-223-P-13C

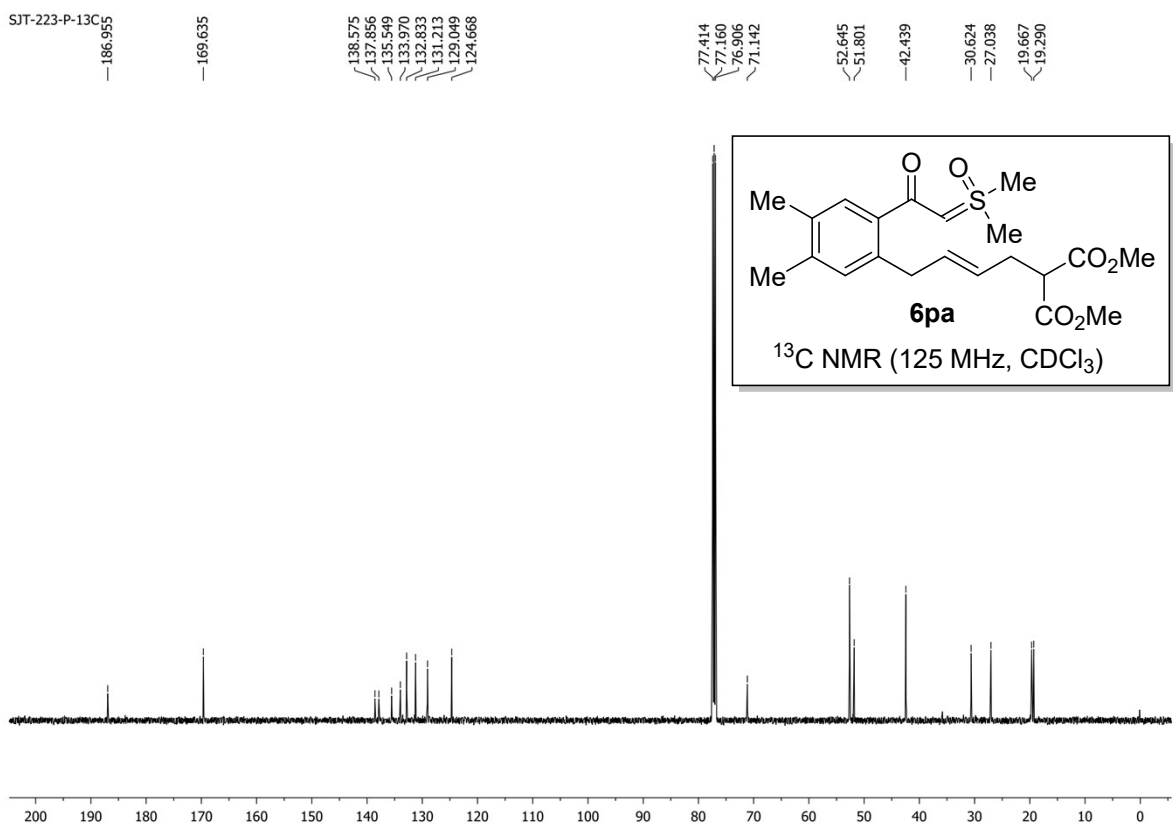

SJT-232-P-1H

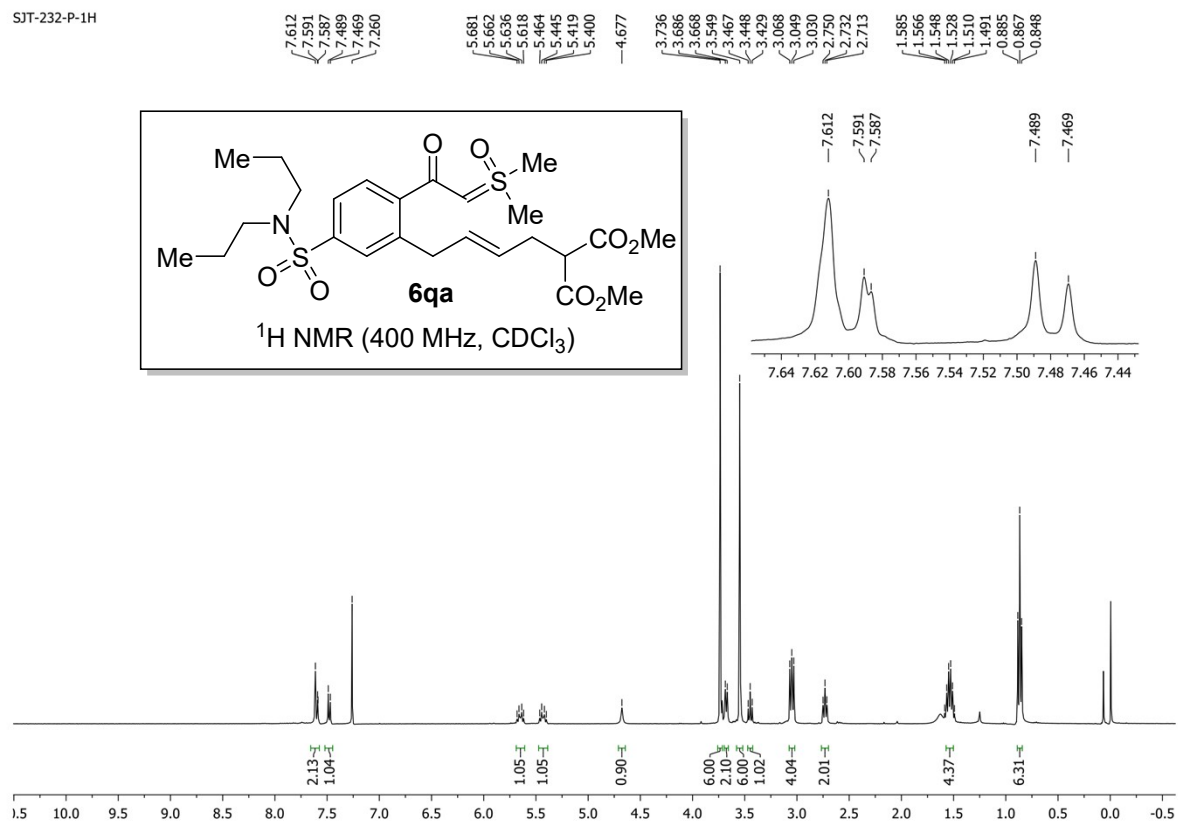

SJT-232-P-13C

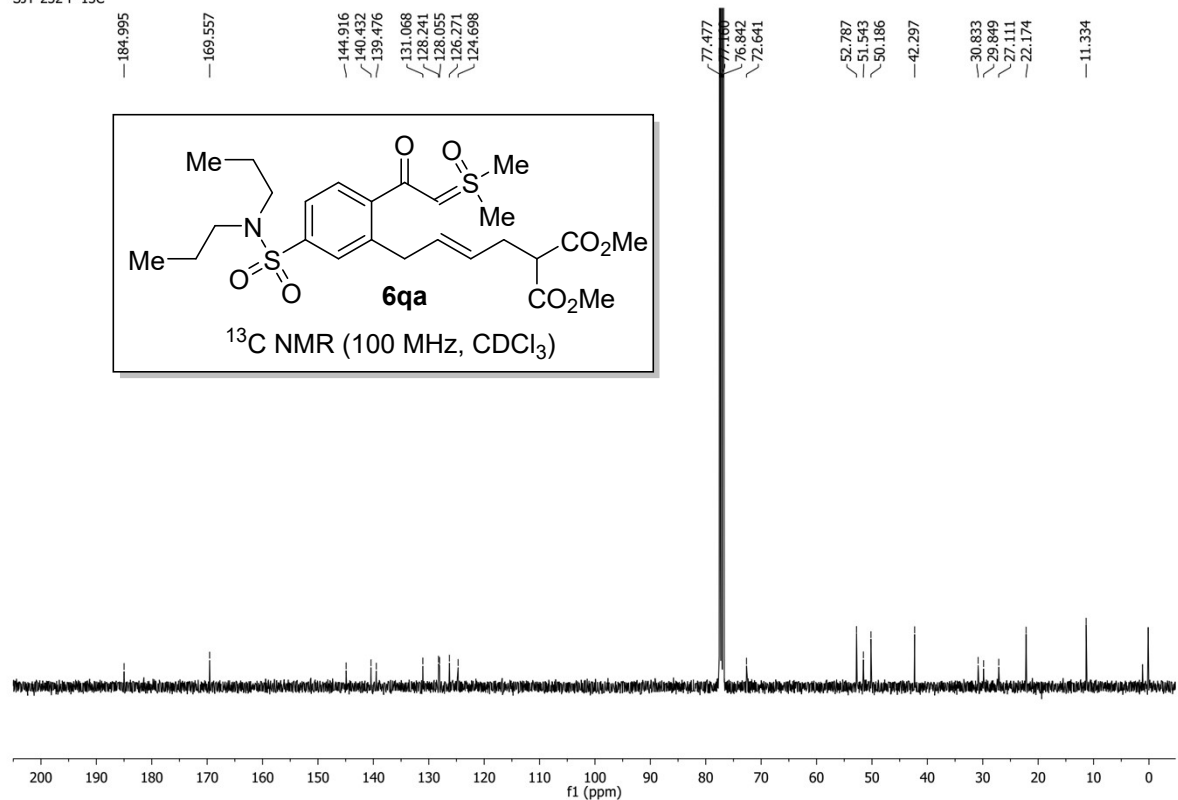

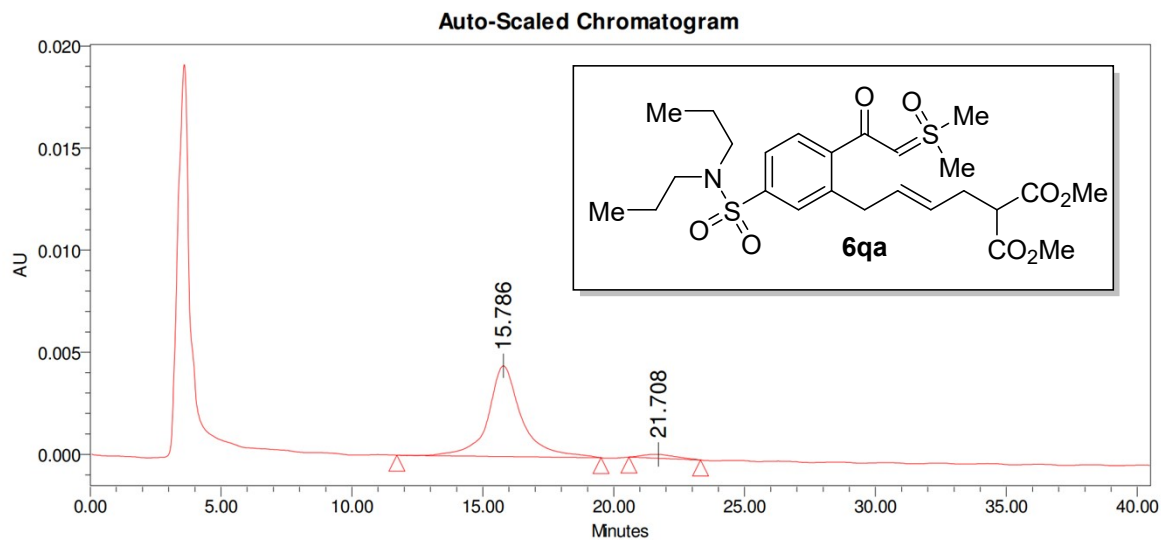

**Peak Results**

|   | Start Time (min) | End Time (min) | RT     | Height (μV) | % Area |
|---|------------------|----------------|--------|-------------|--------|
| 1 | 11.717           | 19.517         | 15.786 | 4441        | 95.88  |
| 2 | 20.583           | 23.317         | 21.708 | 192         | 4.12   |

SJT-225-P-1H

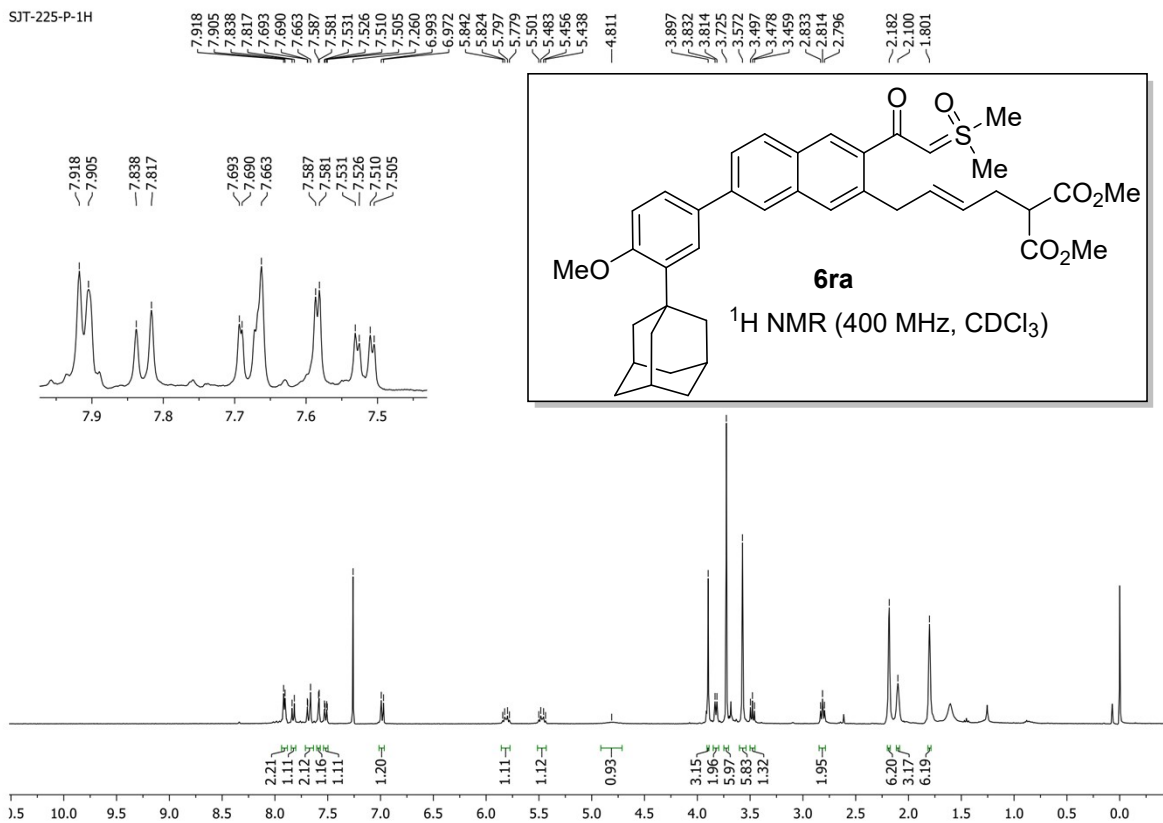

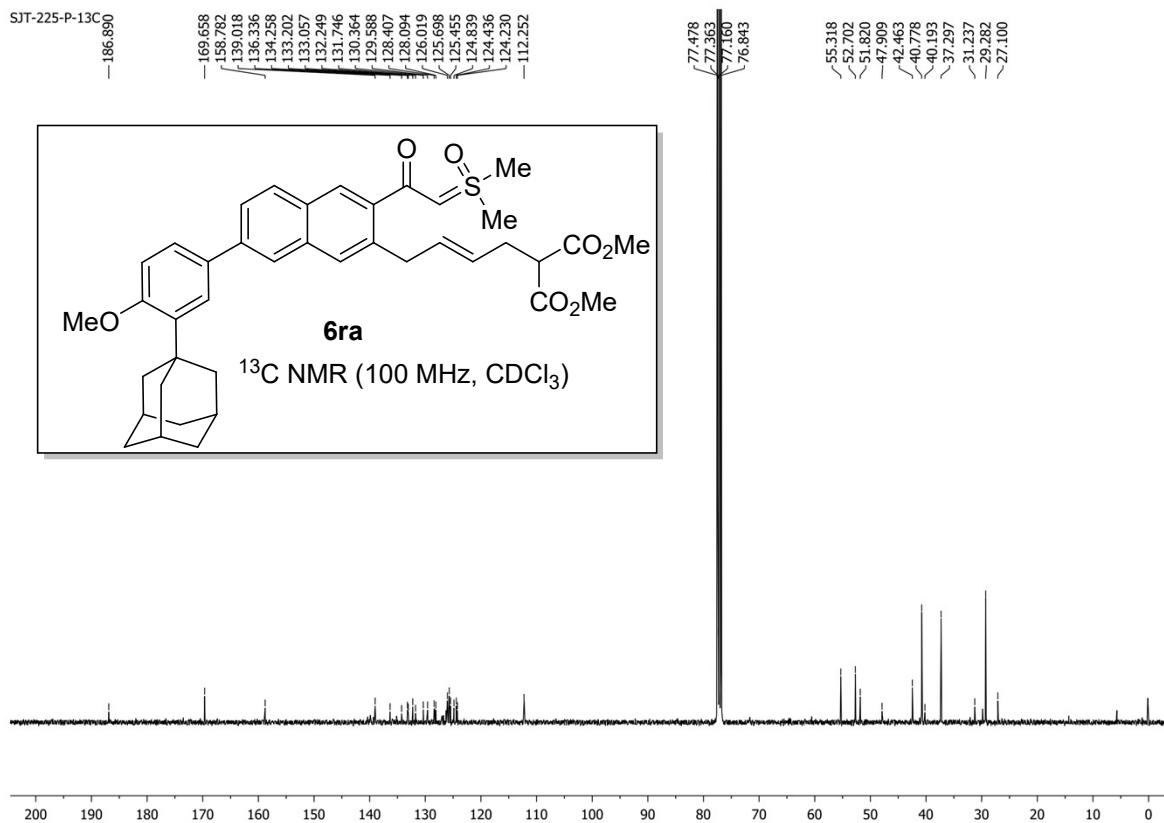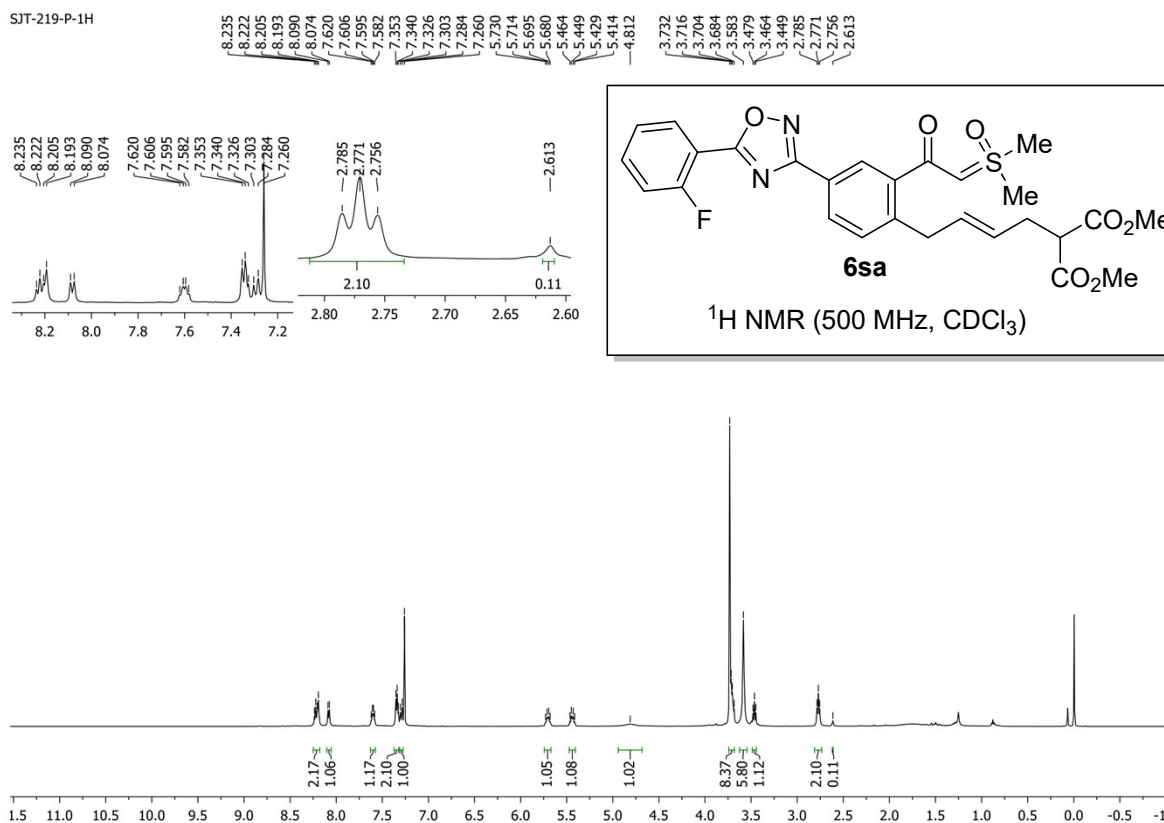

SJT-219-P-13C

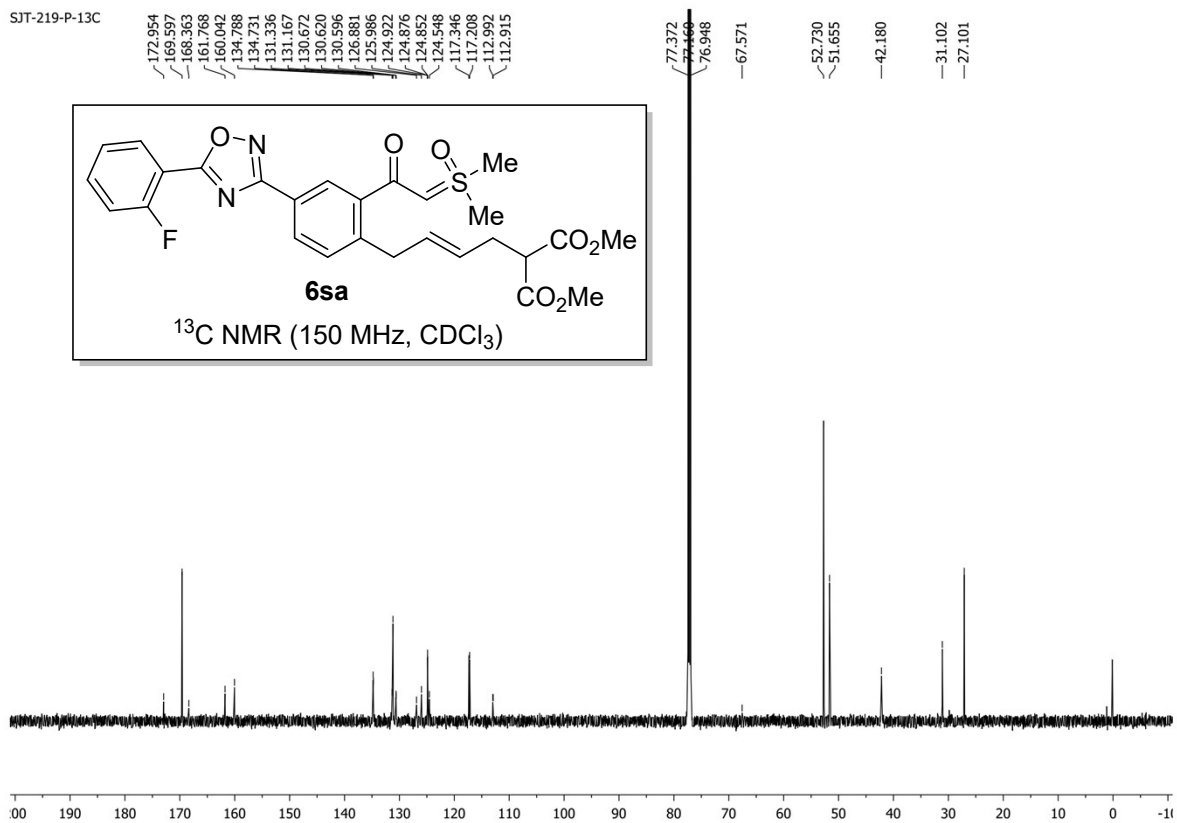

SJT-219-P-19F

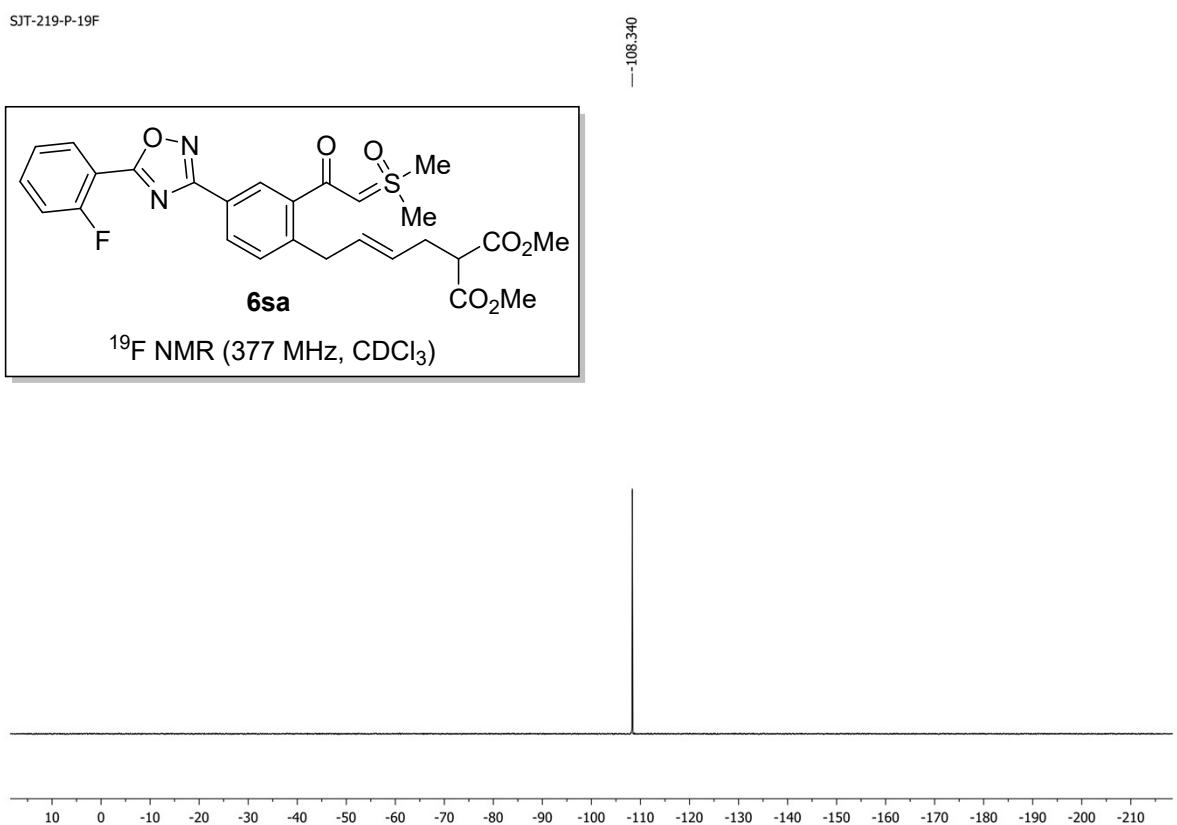



SJT-222-P-1H

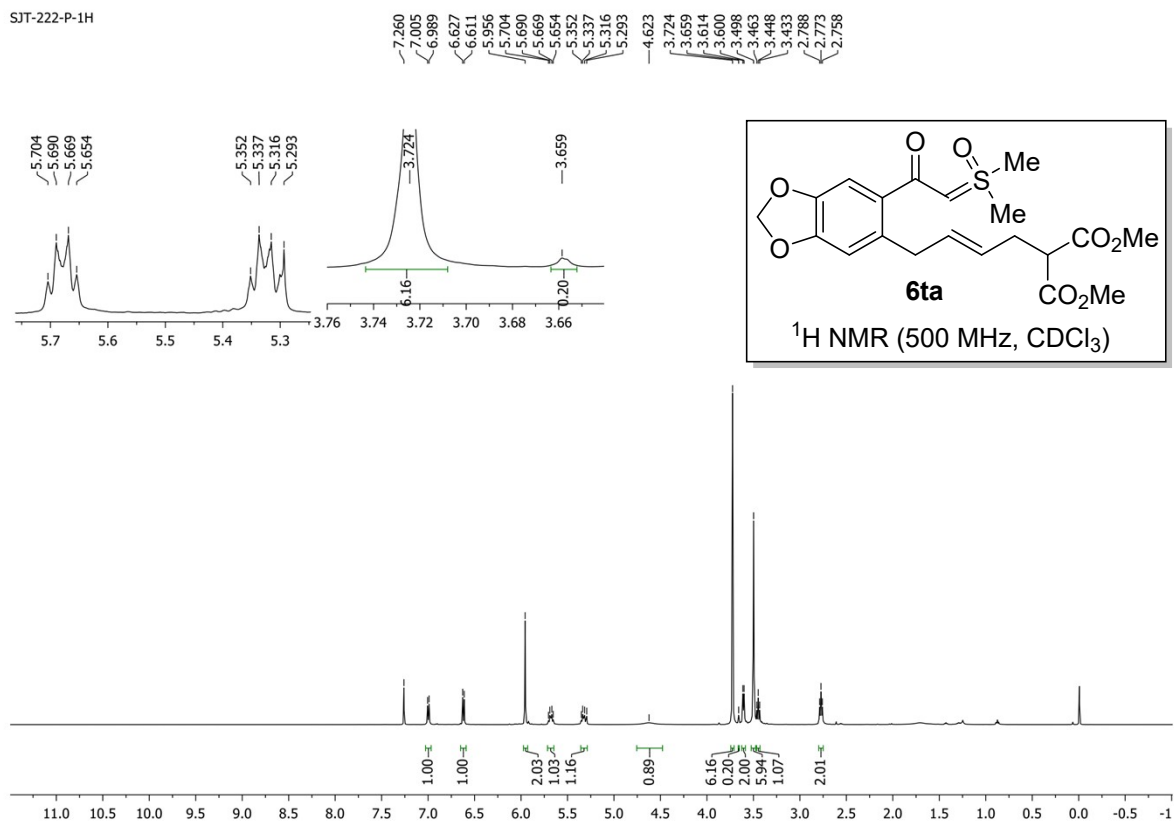

SJT-222-P-13C

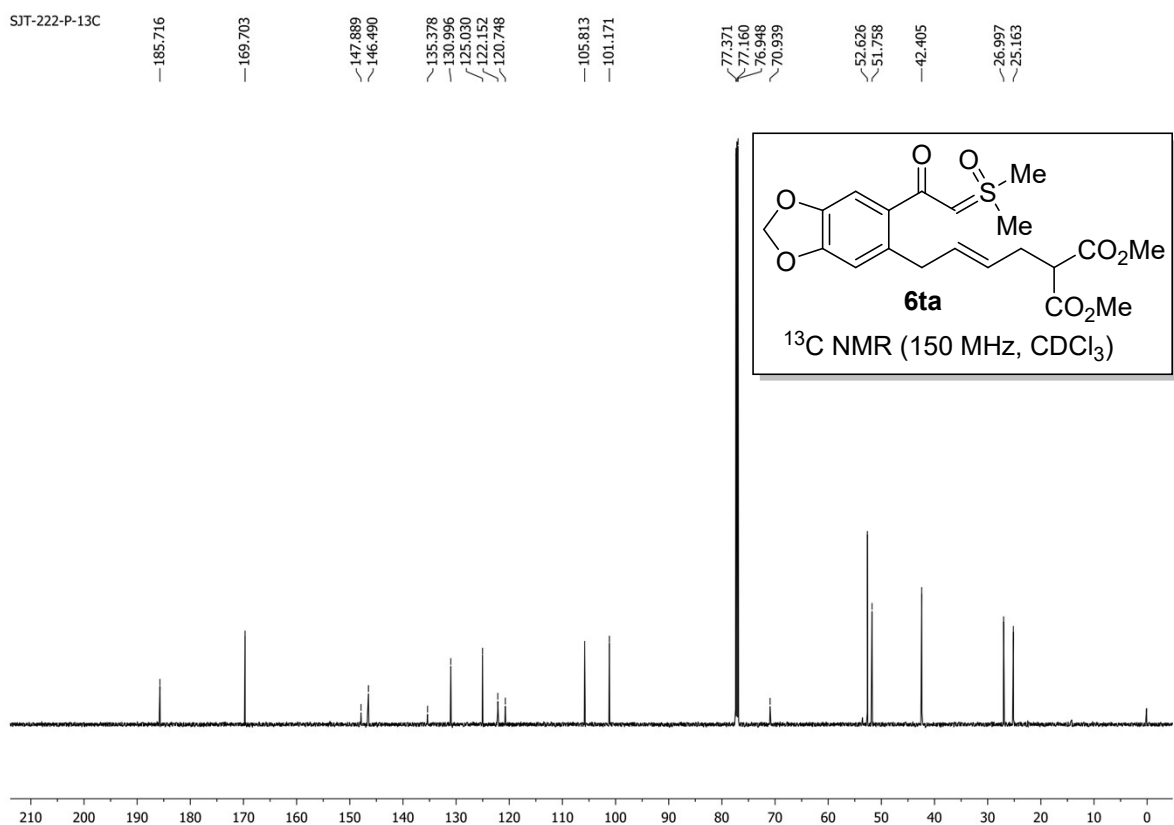

SJT-228-P-1H

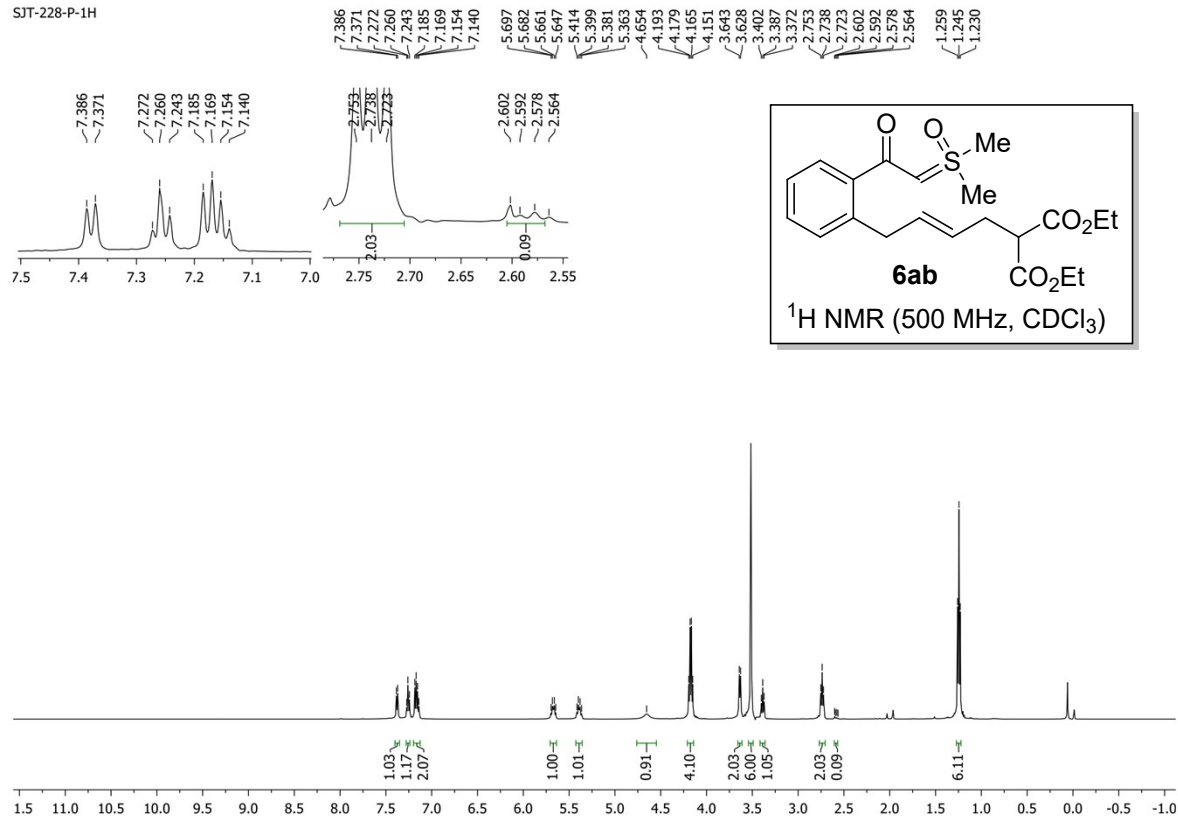

SJT-228-P-13C

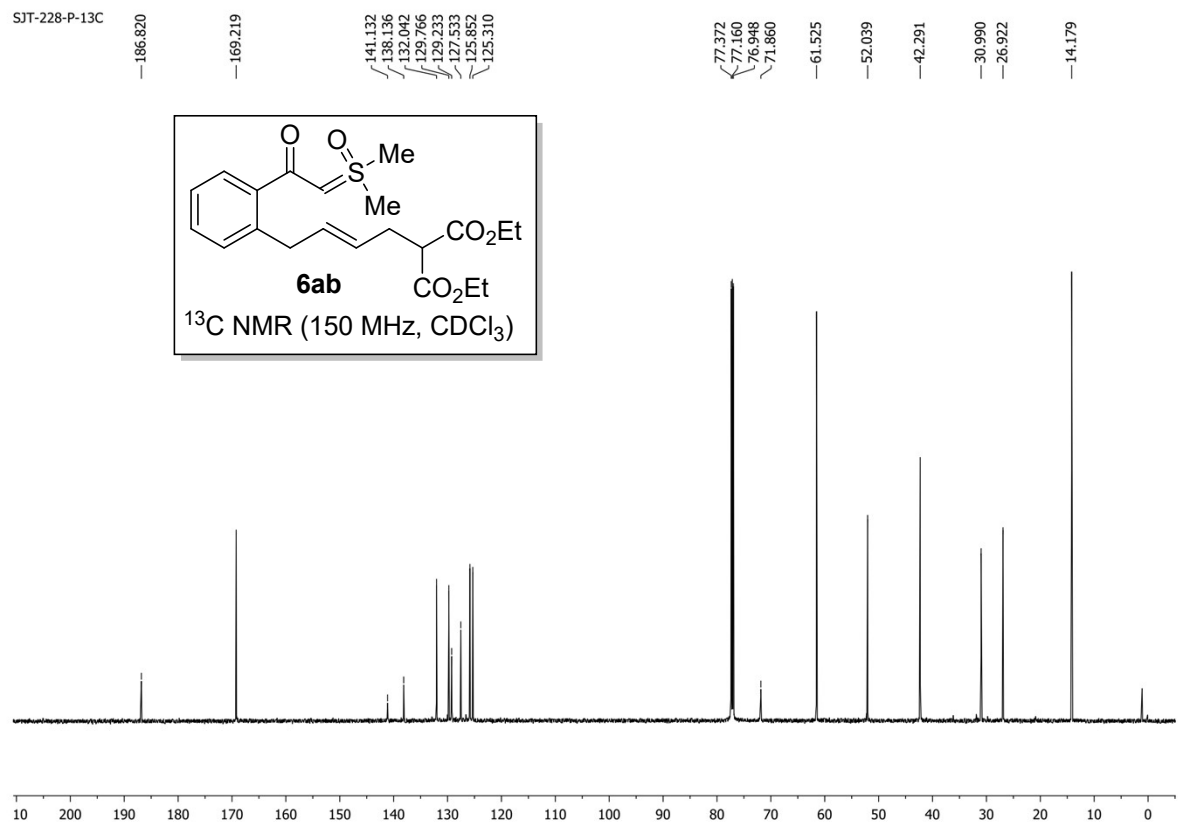

SJT-229-P-1H

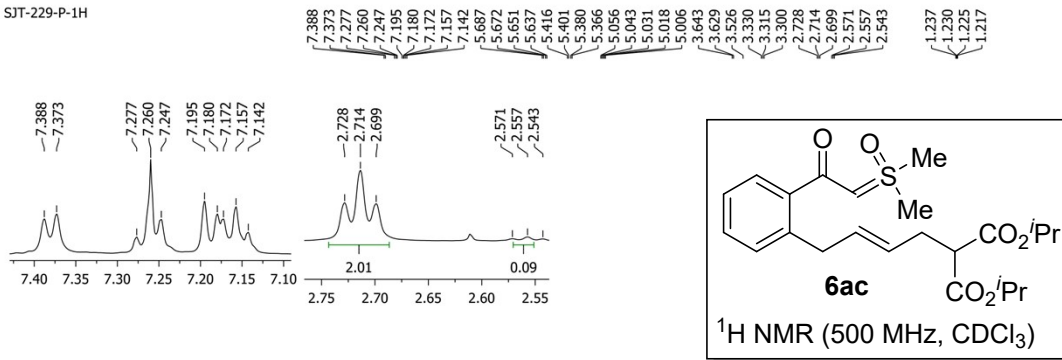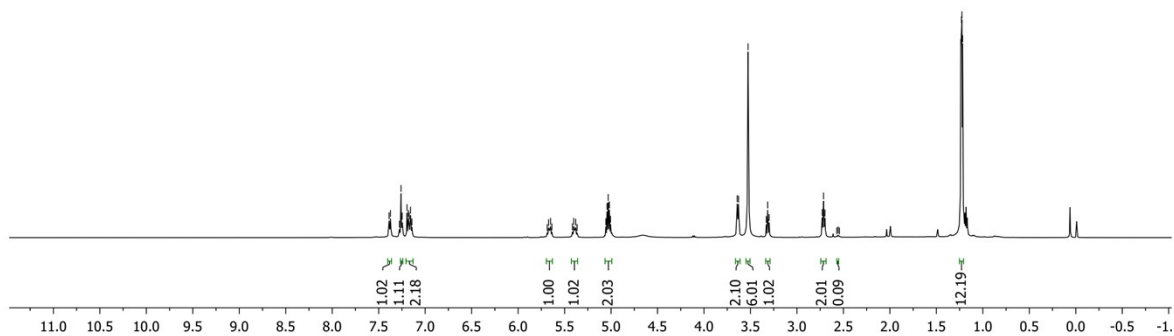

SJT-229-P-13C

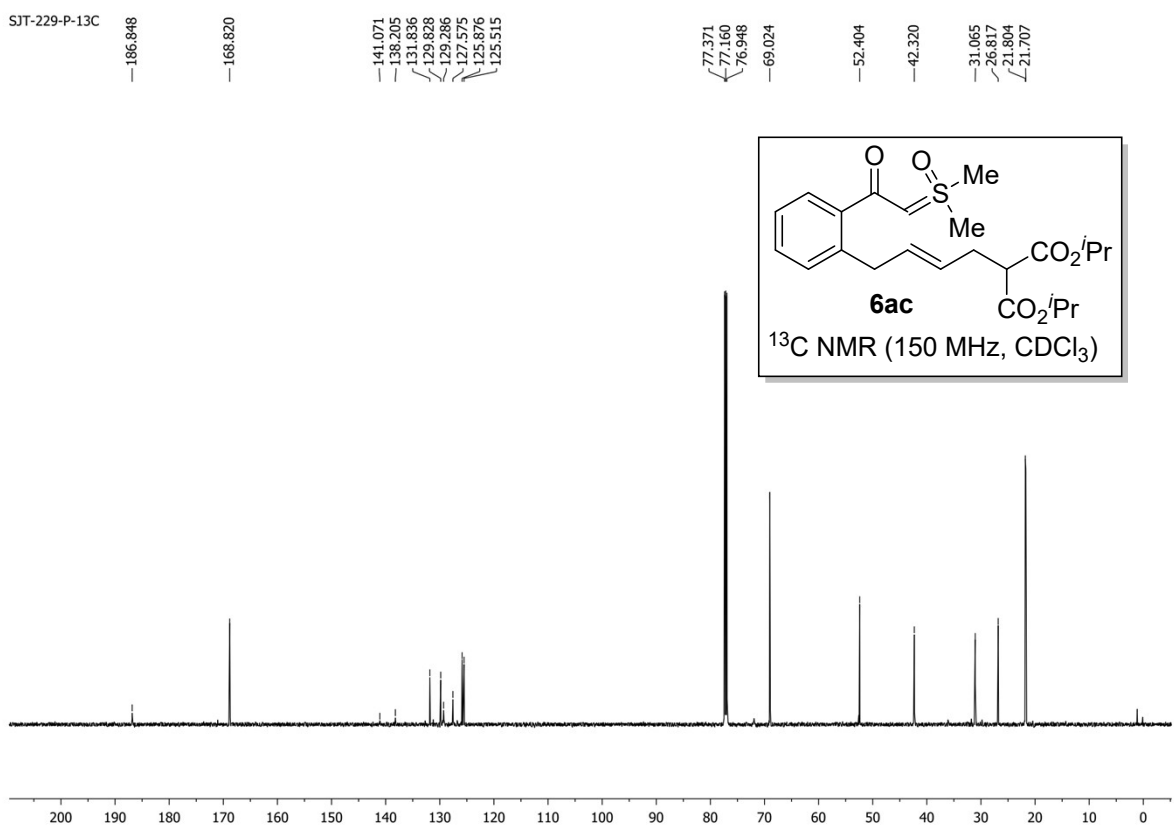

SJT-166-P-1H

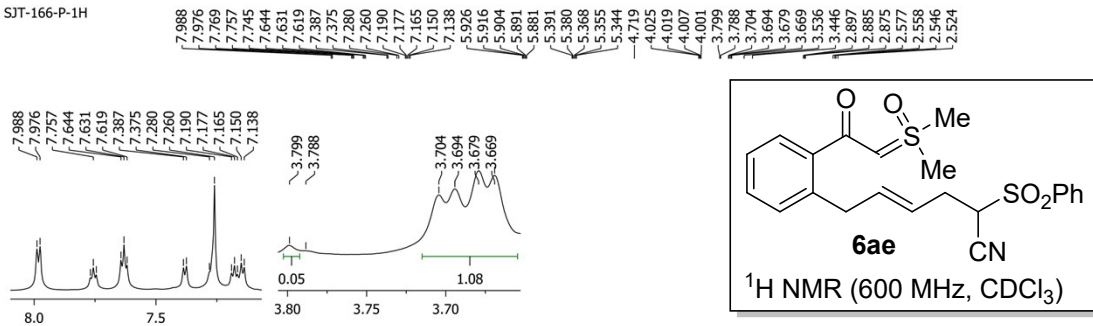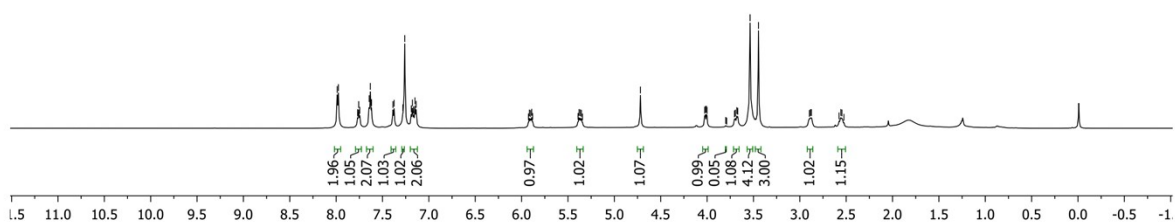

SJT-166-P-13C

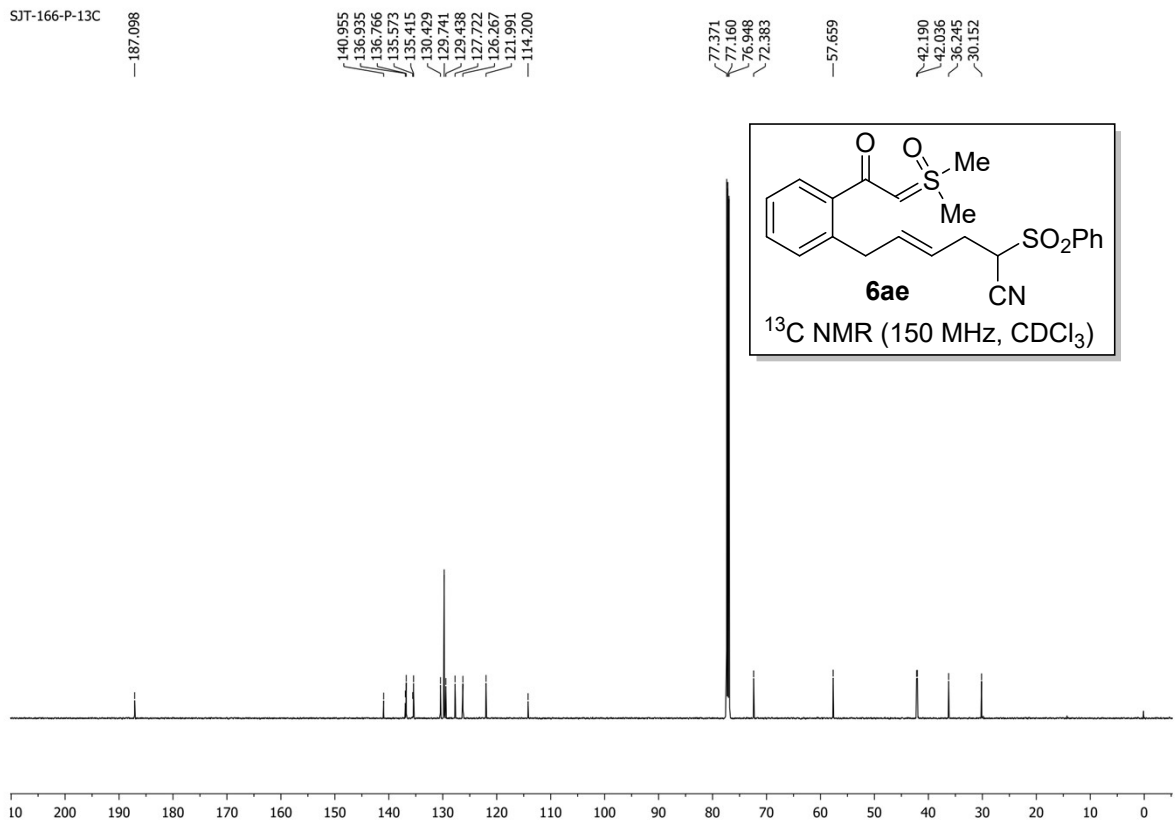

SJT-173-P-1H

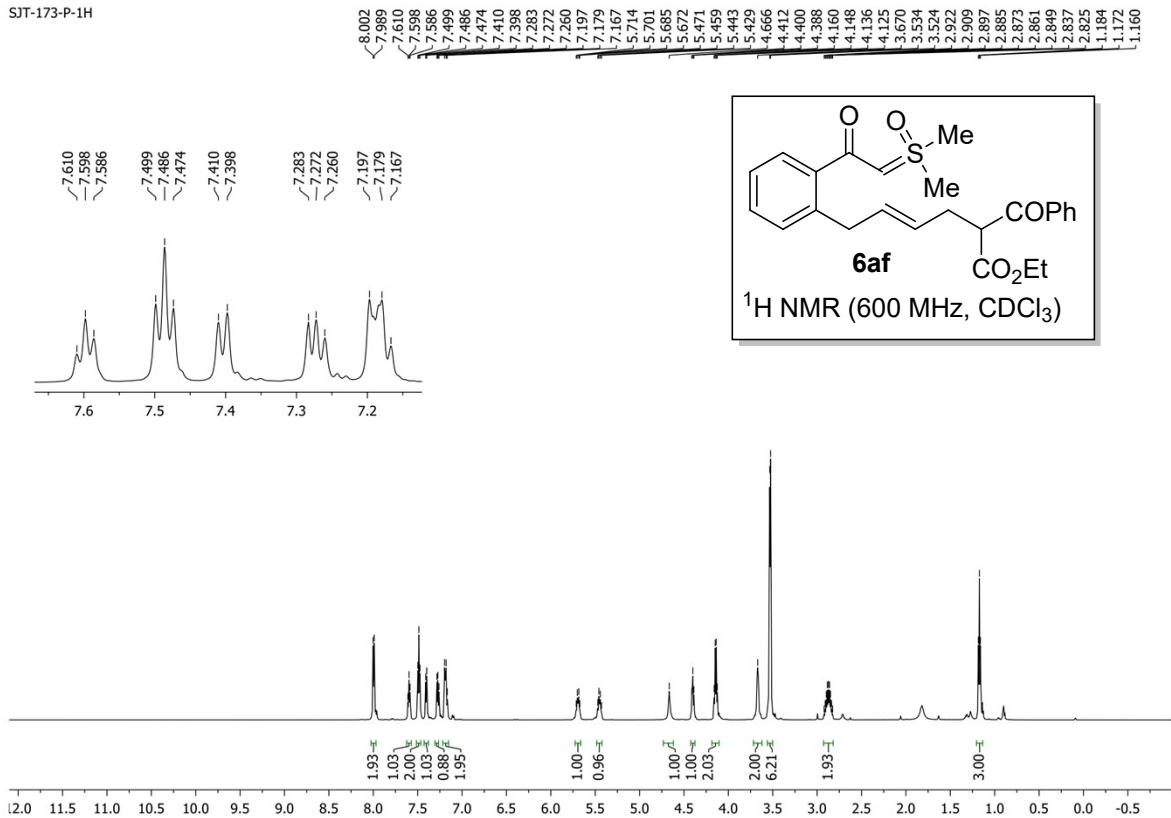

SJT-173-P-13C

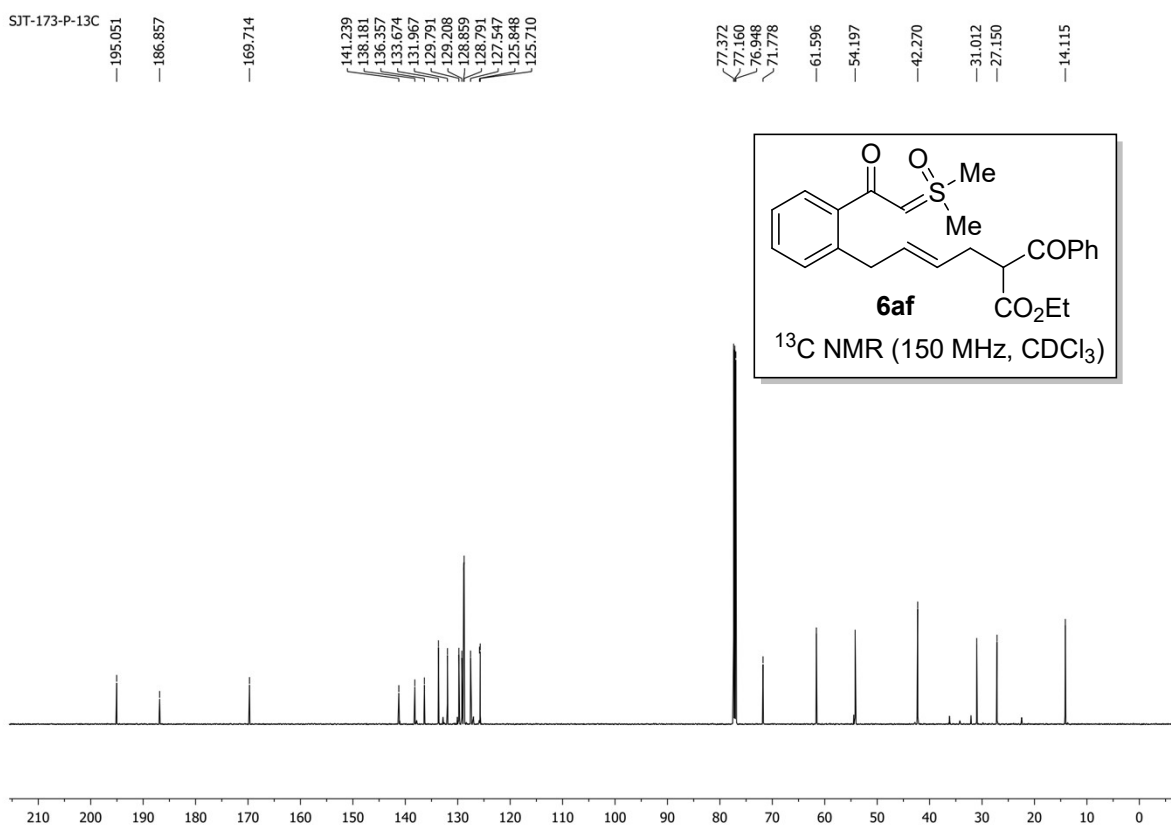

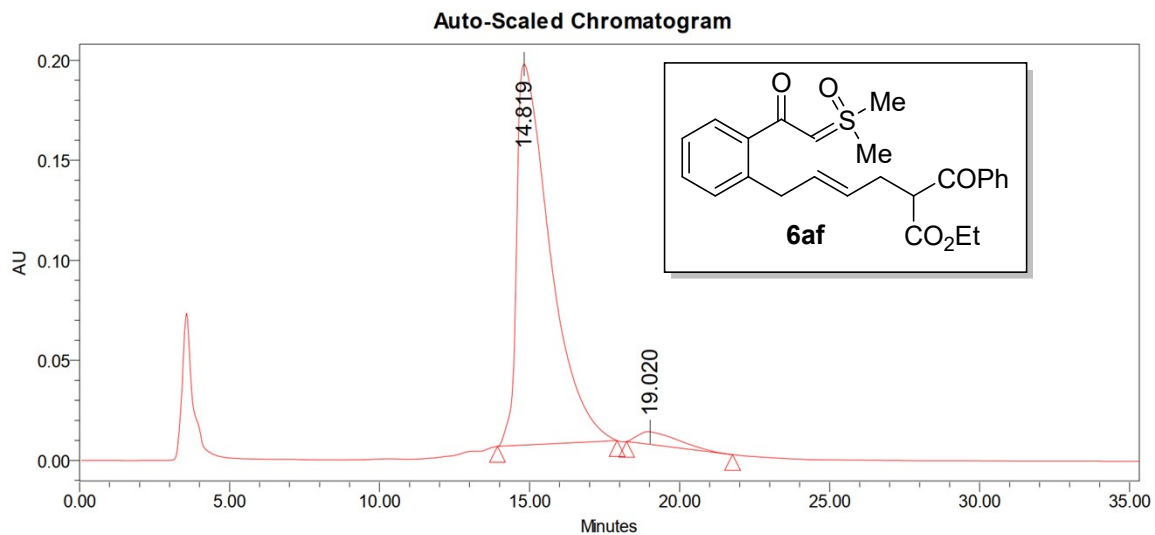

**Peak Results**

|   | Start Time (min) | End Time (min) | RT     | Height (μV) | % Area |
|---|------------------|----------------|--------|-------------|--------|
| 1 | 13.933           | 17.917         | 14.819 | 190429      | 96.04  |
| 2 | 18.233           | 21.767         | 19.020 | 6289        | 3.96   |

SJT-165-P-1H

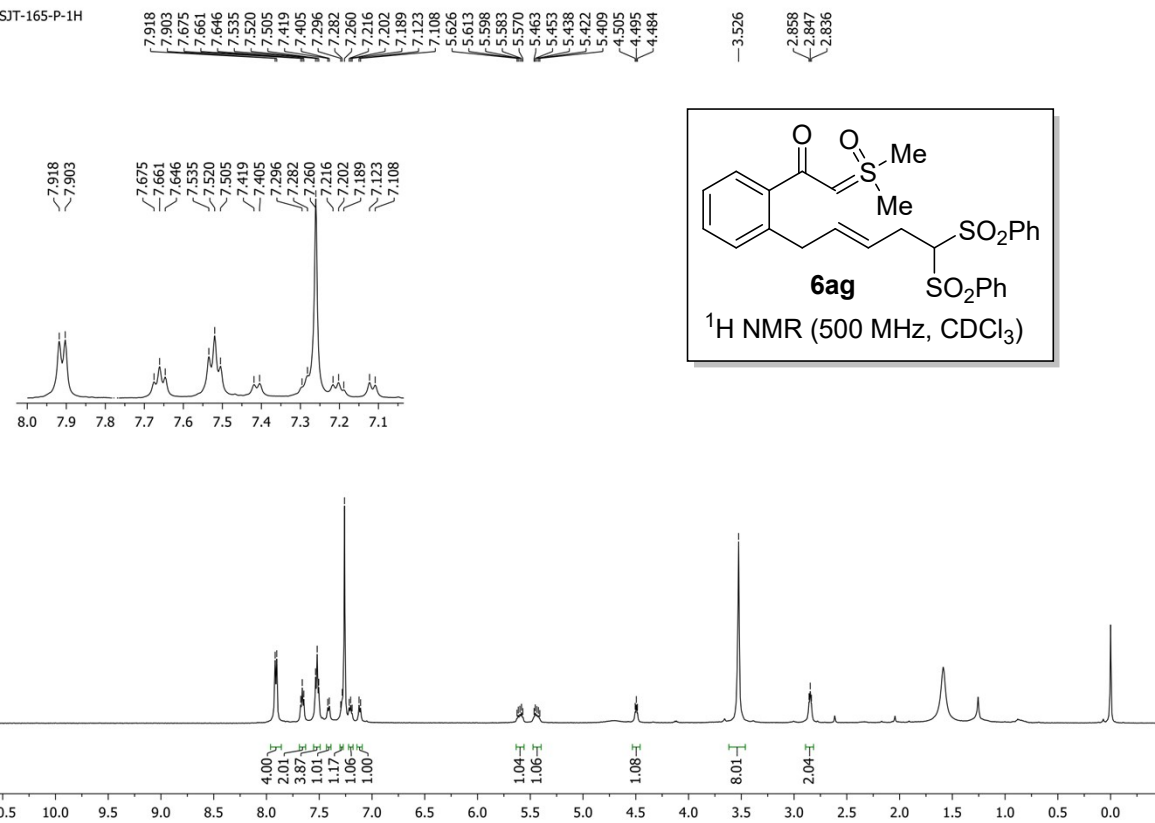

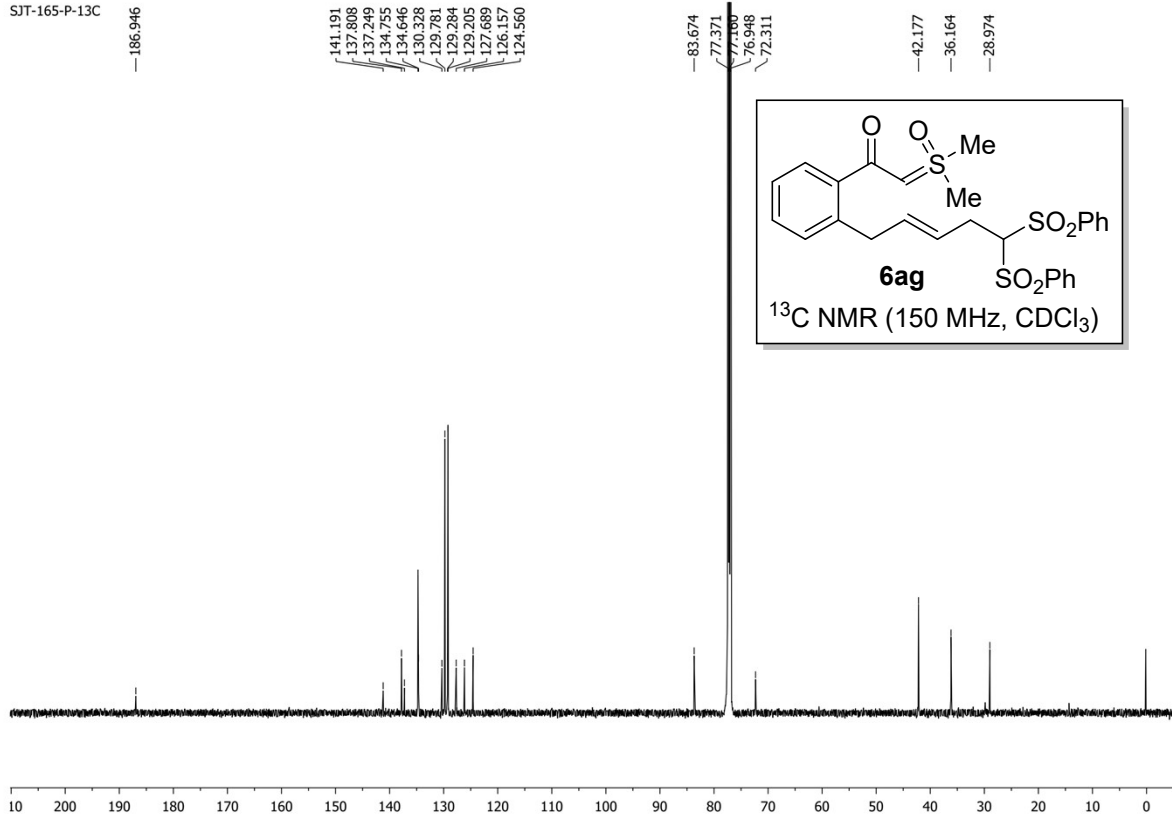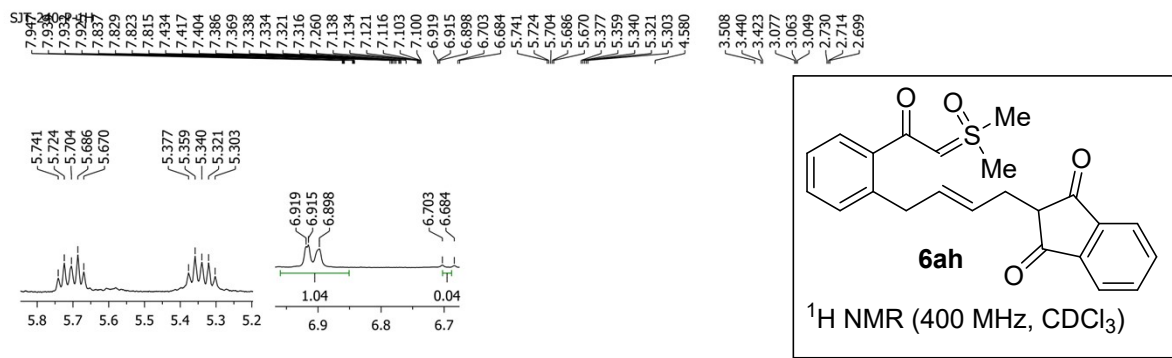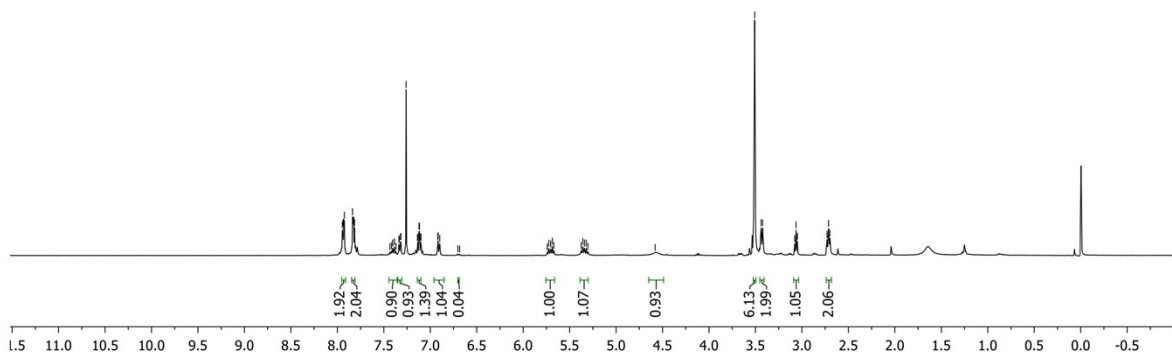

SJT-240-P-13C

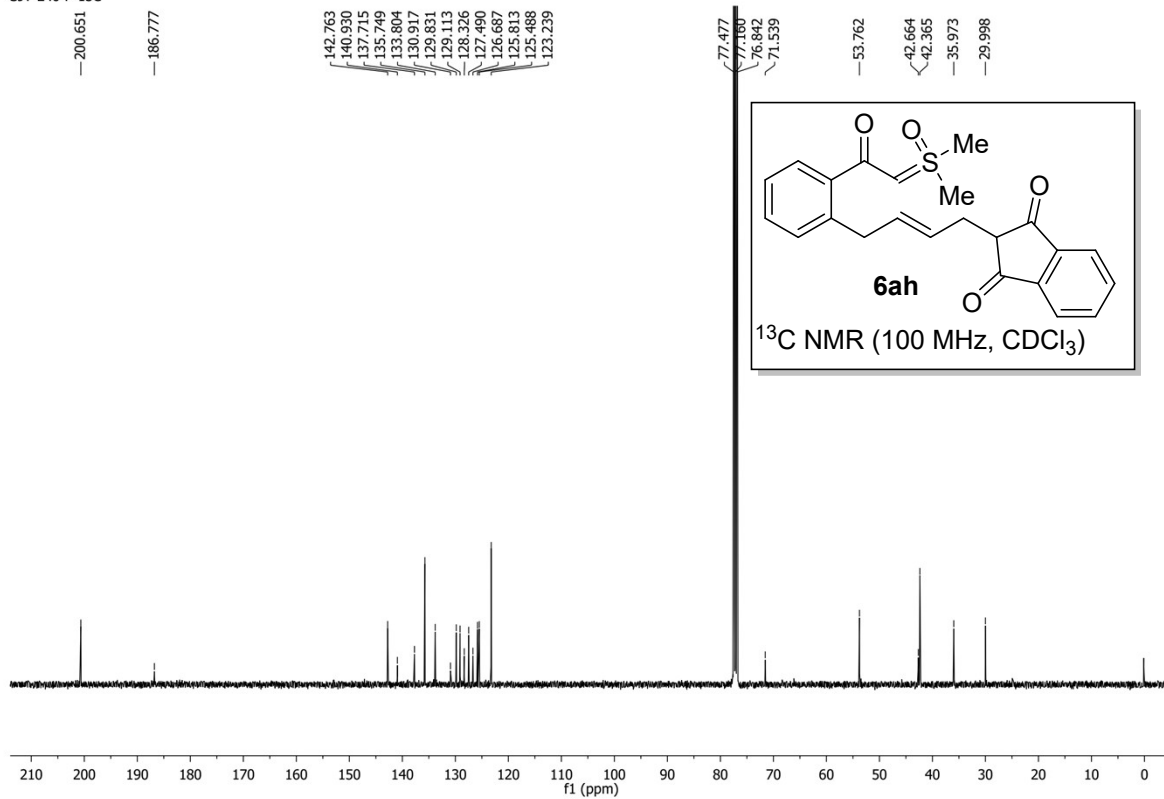

SJT-271-P-1H

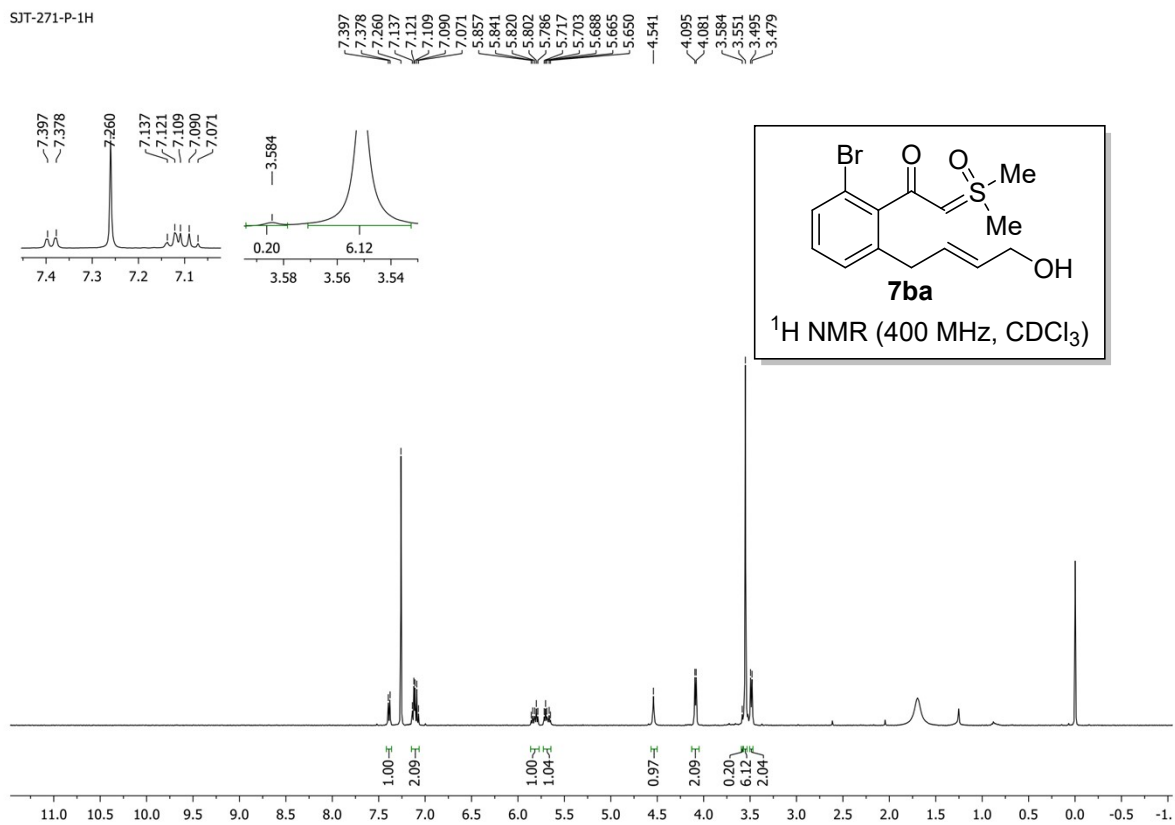



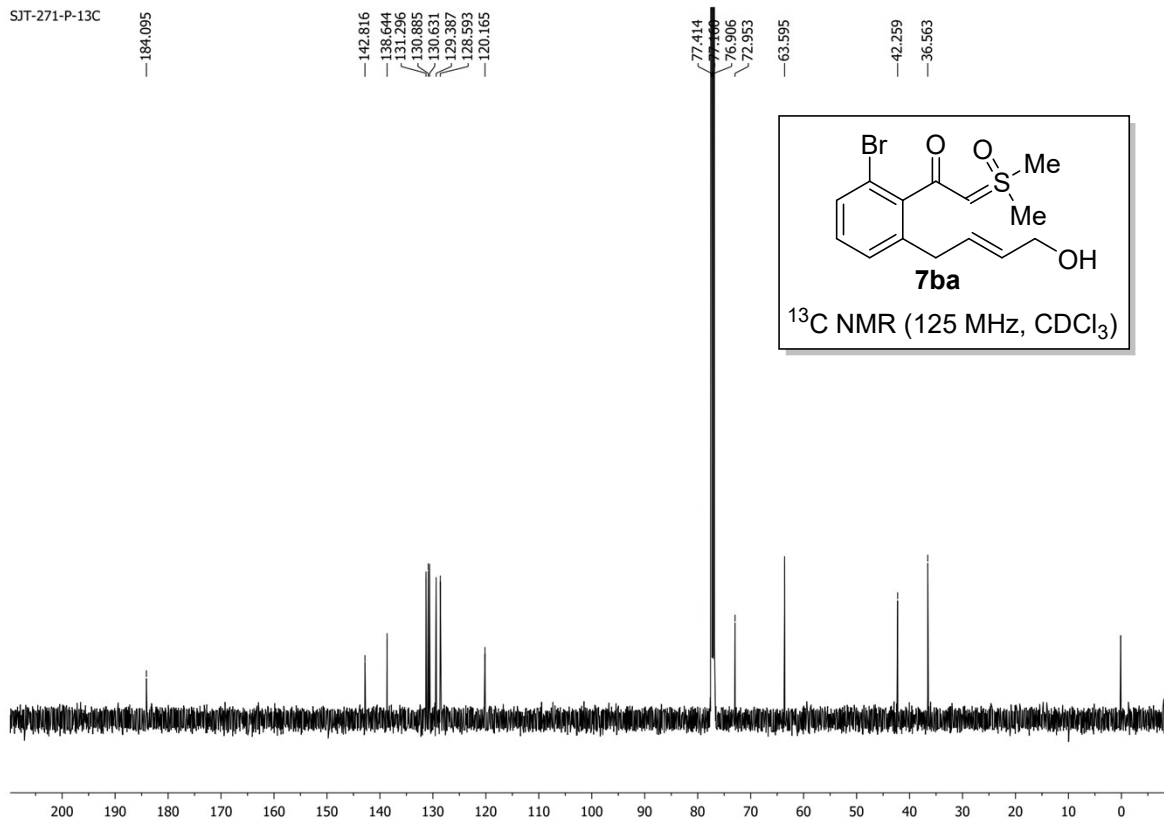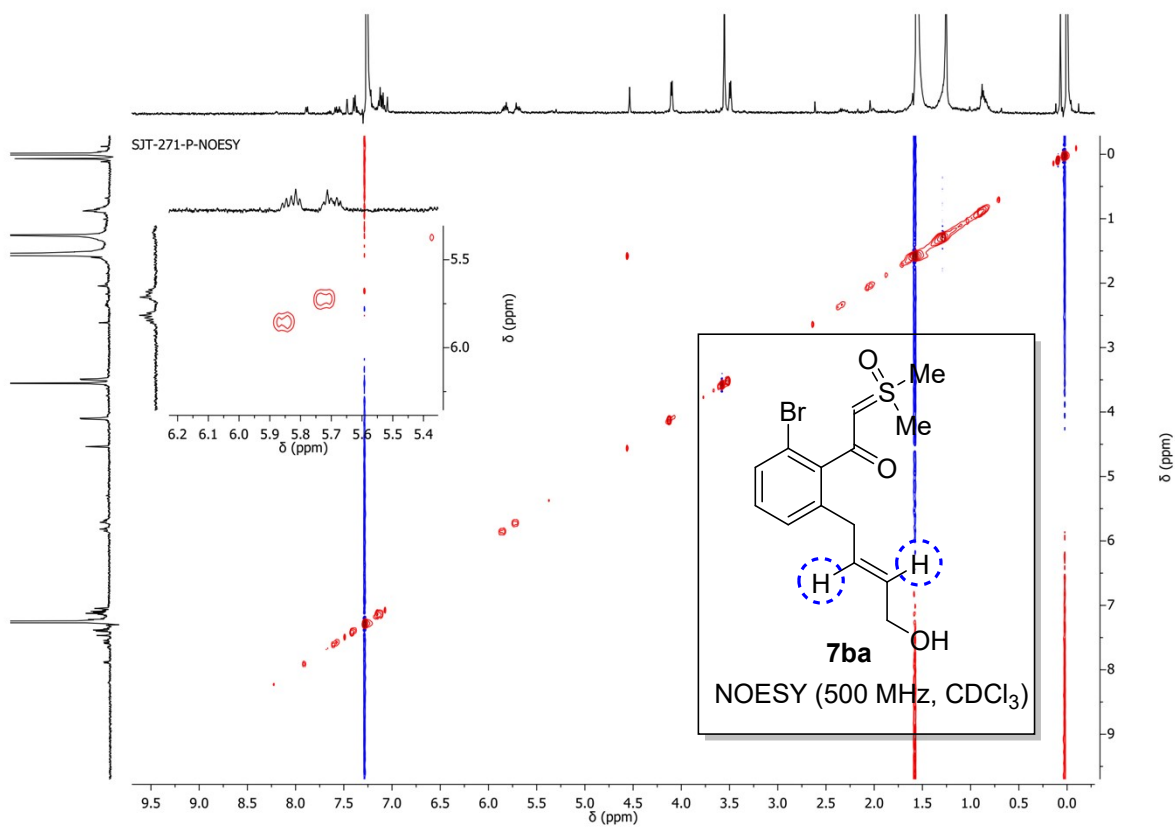

SJT-269-P-1H

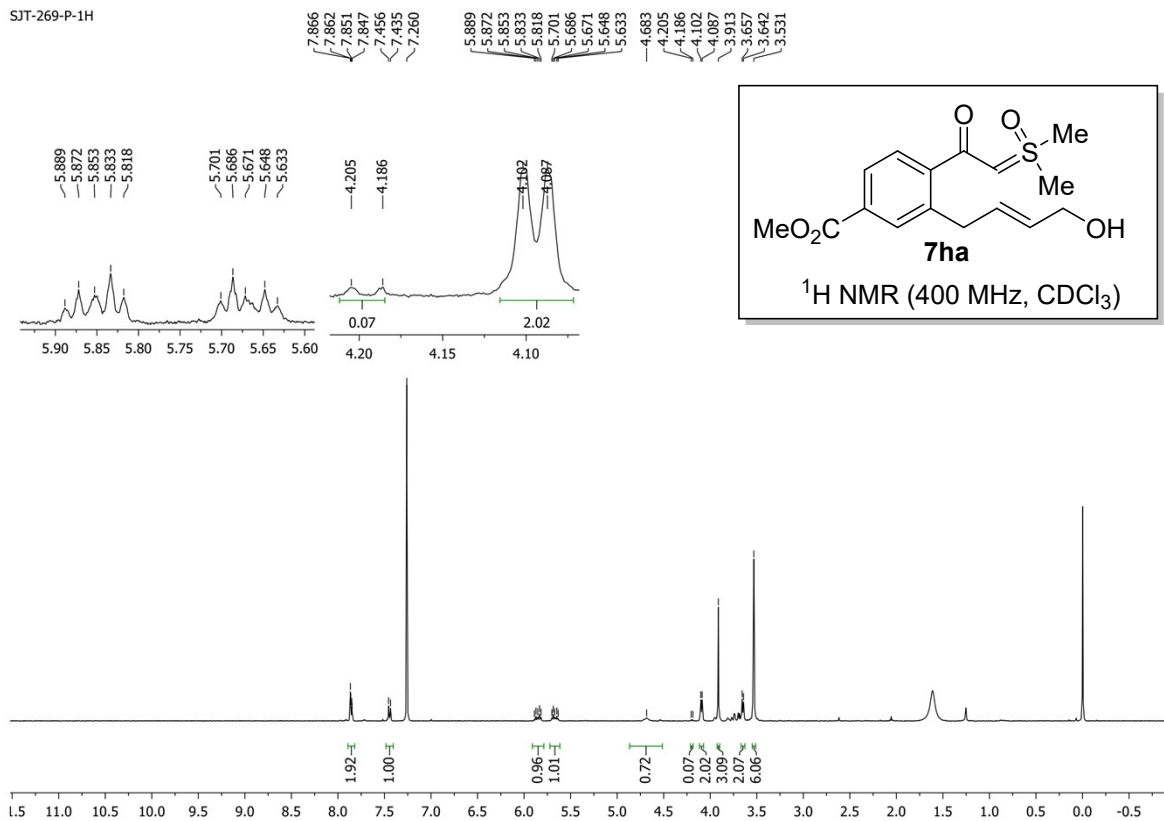

SJT-269-P-13C

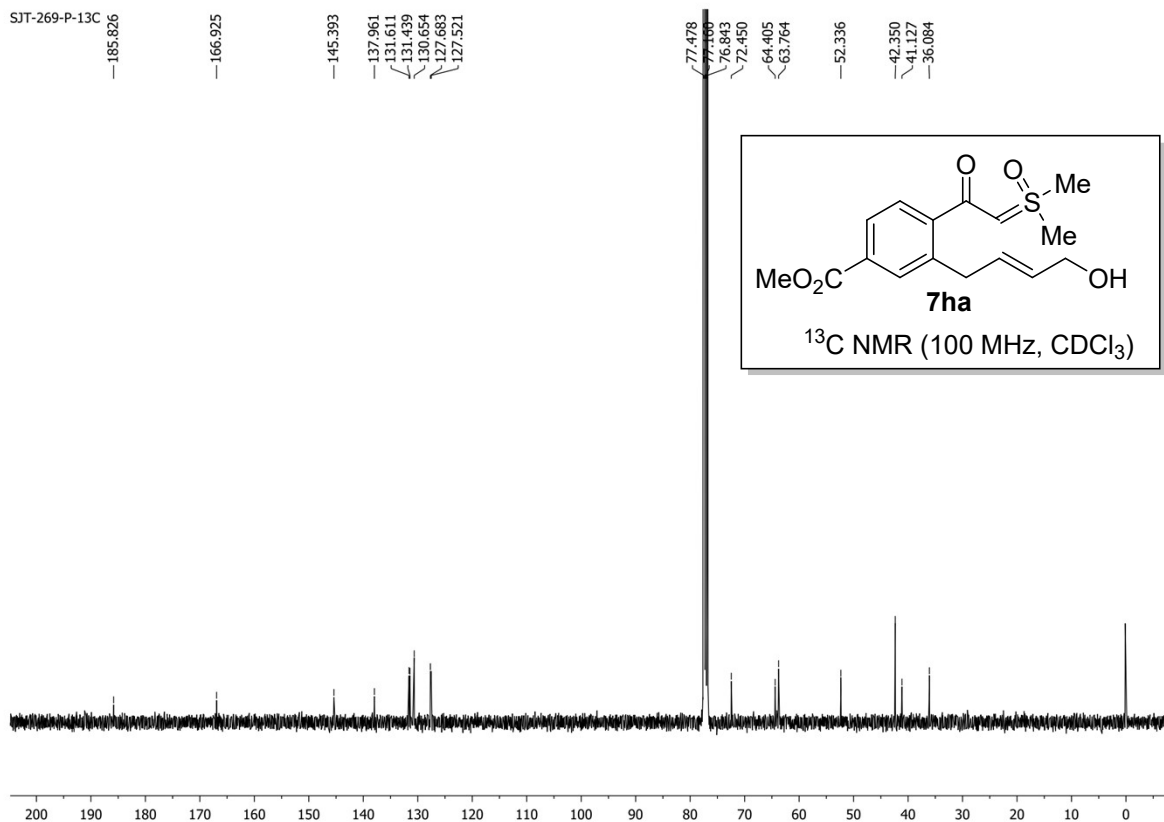

SJT-270-P-1H

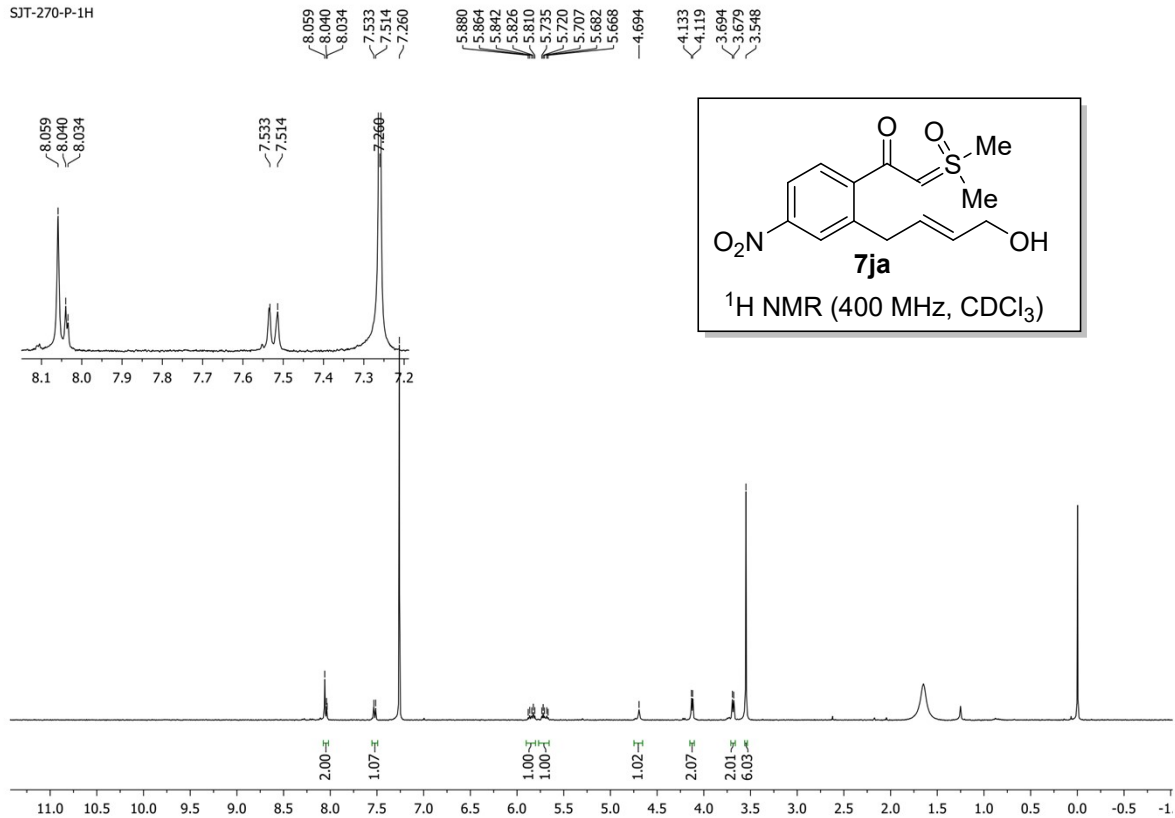

SJT-270-P-13C

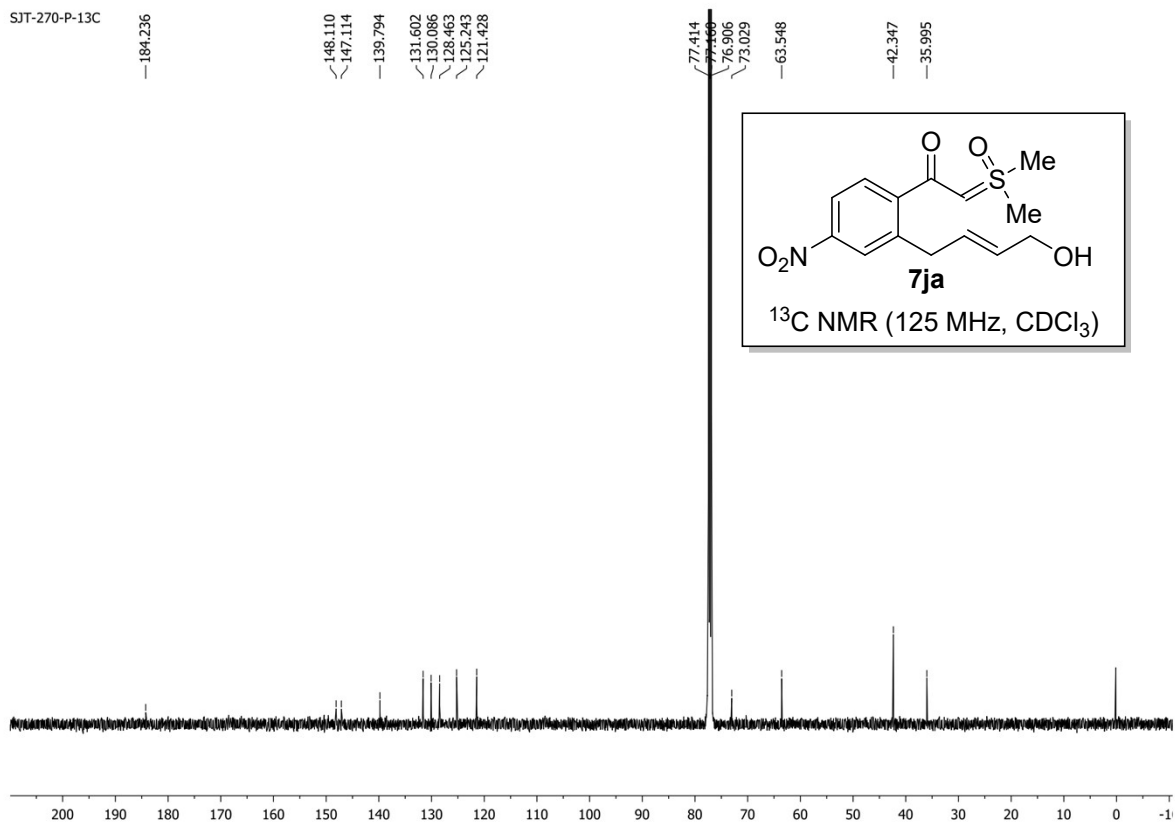

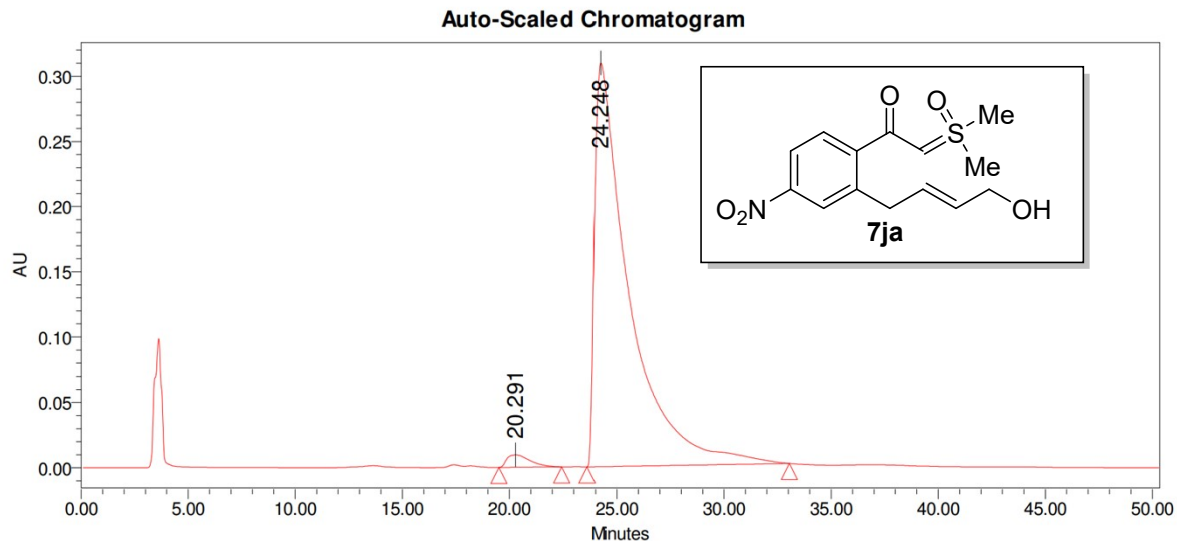

**Peak Results**

|   | Start Time (min) | End Time (min) | RT     | Height (μV) | % Area |
|---|------------------|----------------|--------|-------------|--------|
| 1 | 19.517           | 22.450         | 20.291 | 9432        | 2.03   |
| 2 | 23.617           | 33.050         | 24.248 | 309406      | 97.97  |

SJT-263-P-1H

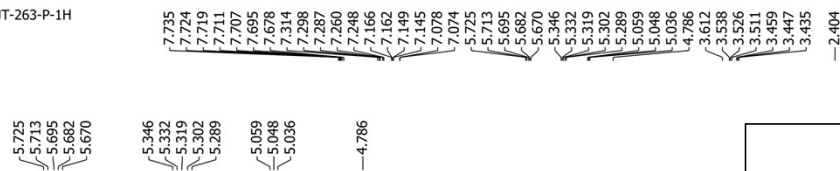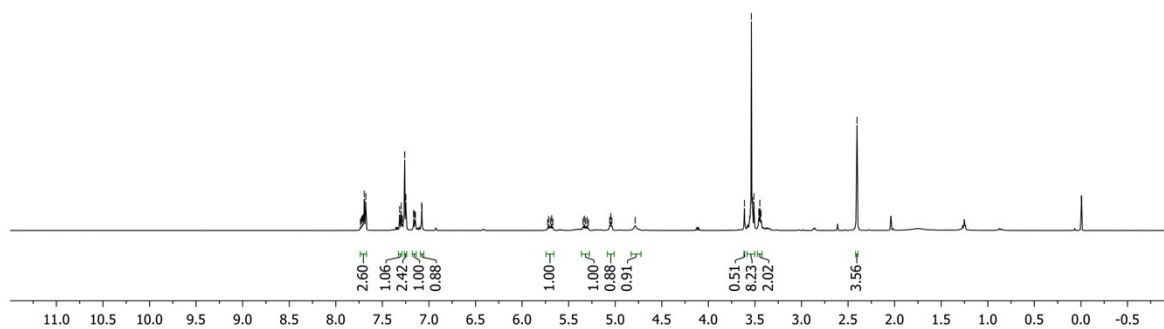

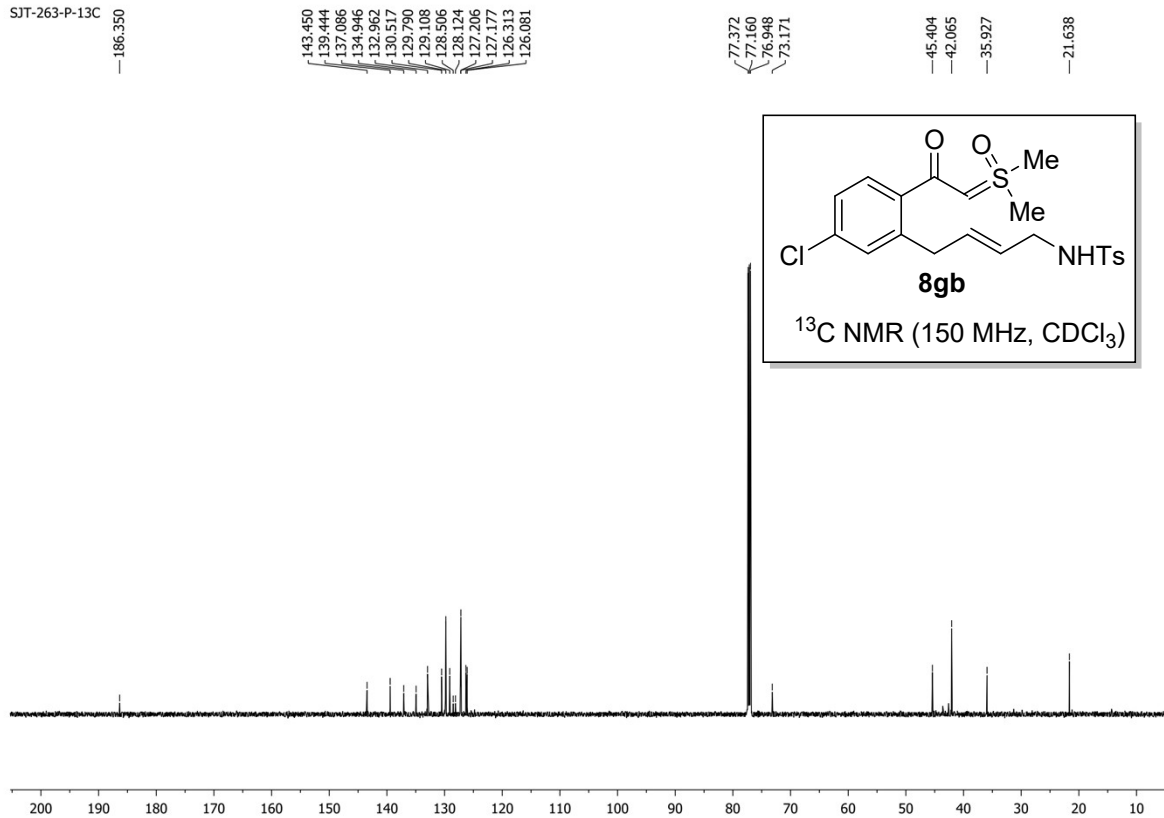

Auto-Scaled Chromatogram

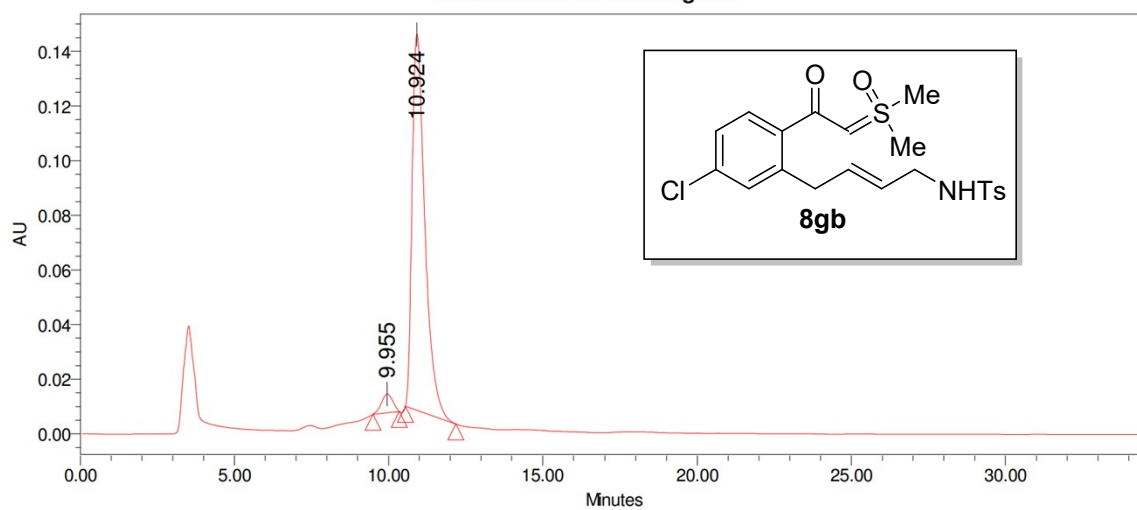

Peak Results

|   | Start Time (min) | End Time (min) | RT     | Height ( $\mu\text{V}$ ) | % Area |
|---|------------------|----------------|--------|--------------------------|--------|
| 1 | 9.500            | 10.350         | 9.955  | 6882                     | 4.20   |
| 2 | 10.550           | 12.183         | 10.924 | 137738                   | 95.80  |

SJT-281-P-1H

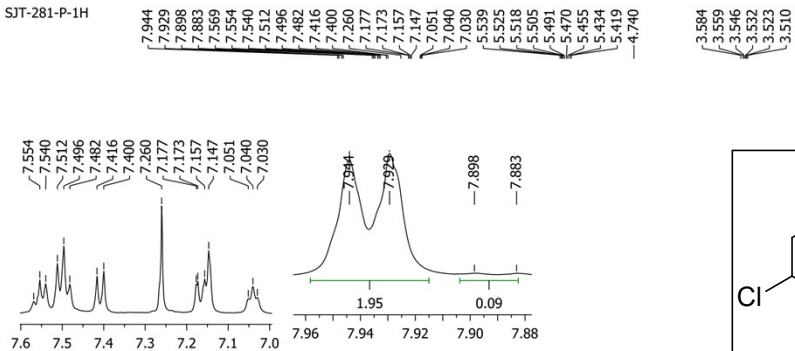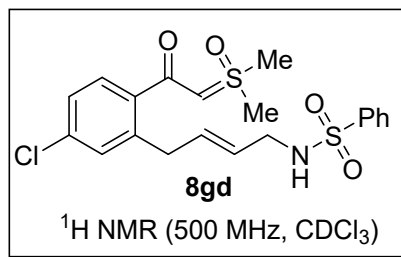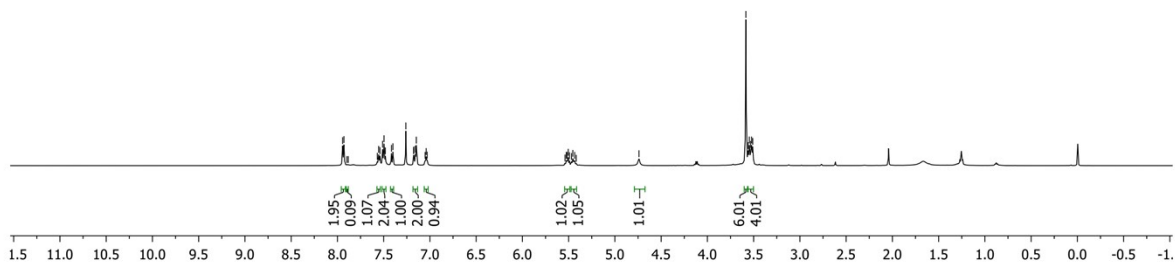

SJT-281-P-13C

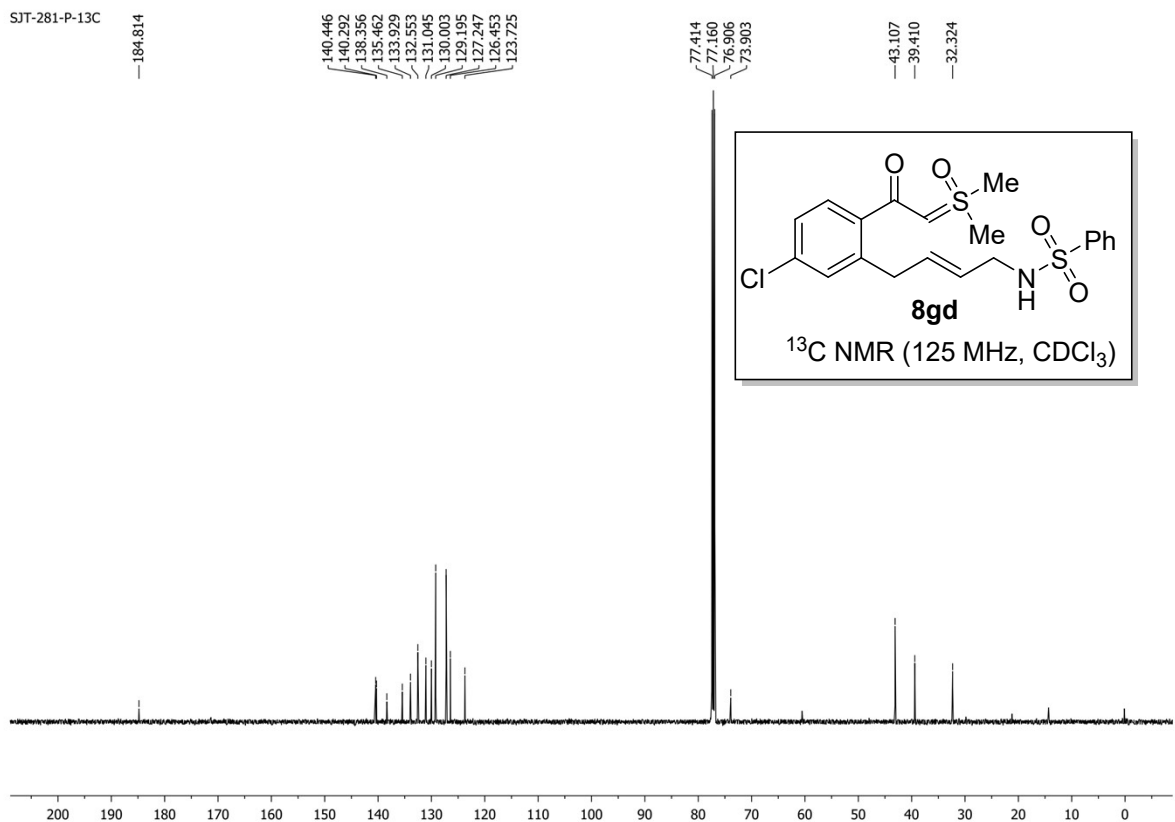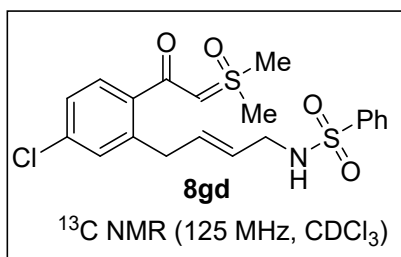

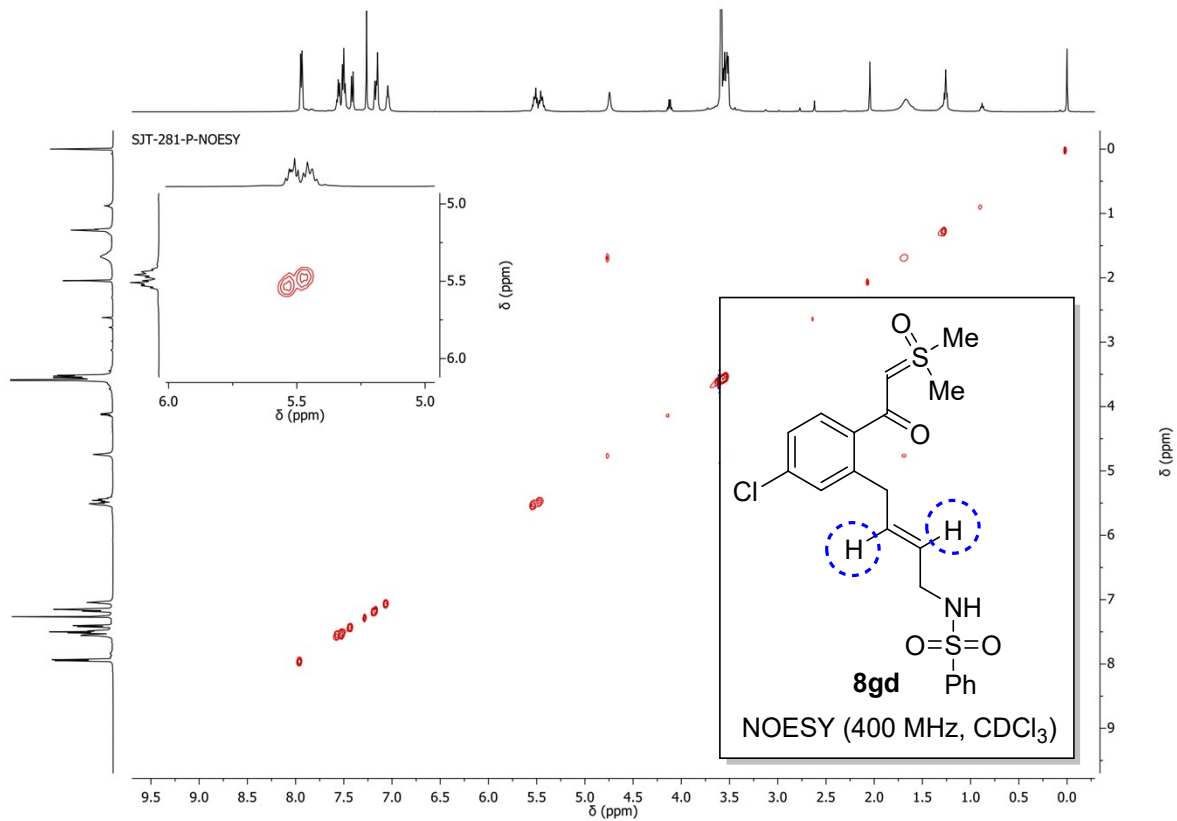

SJT-262-P-1H

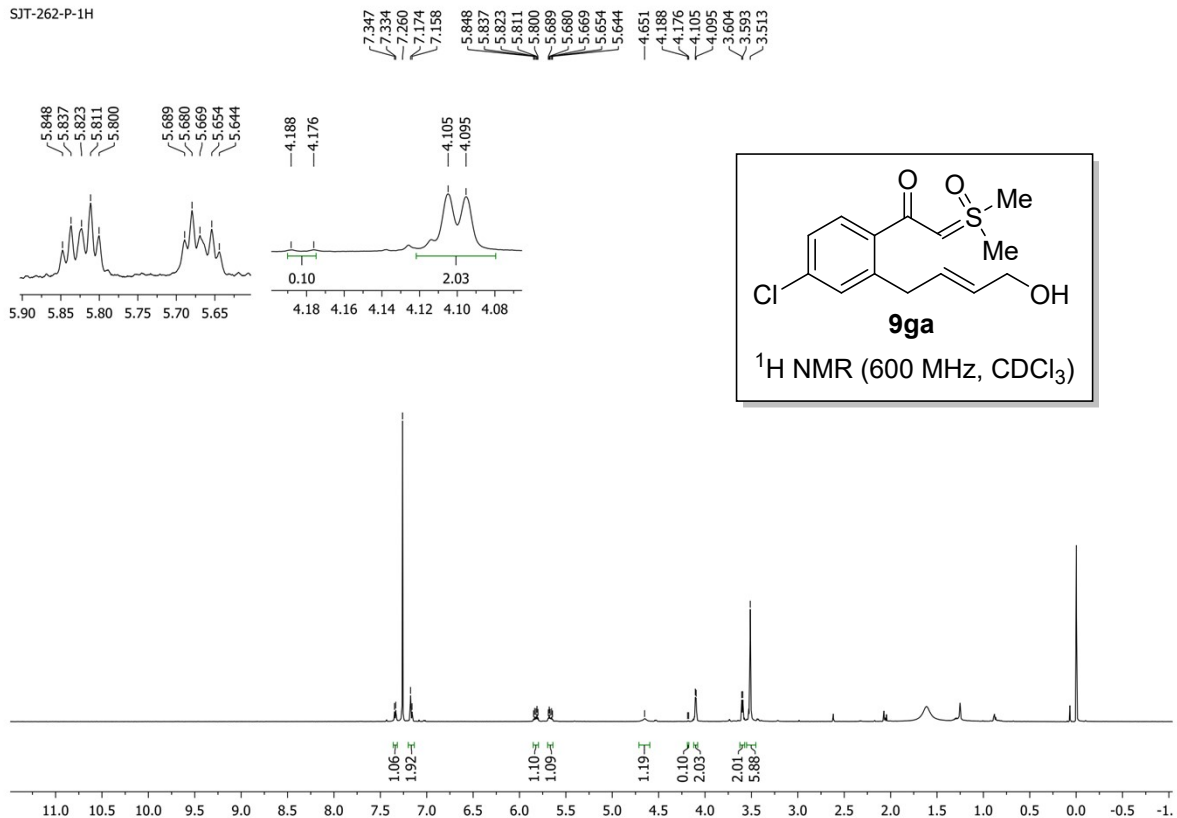

SJT-262-P-13C

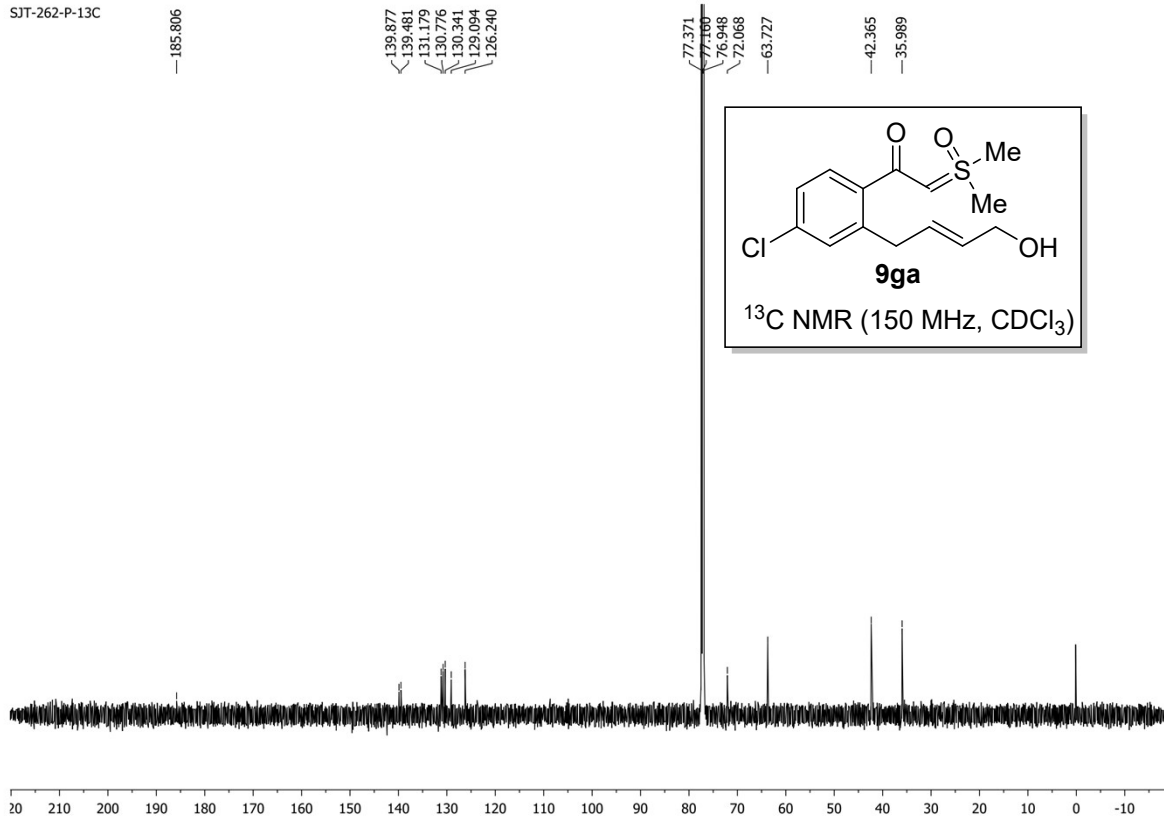

SJT-266-P-1H

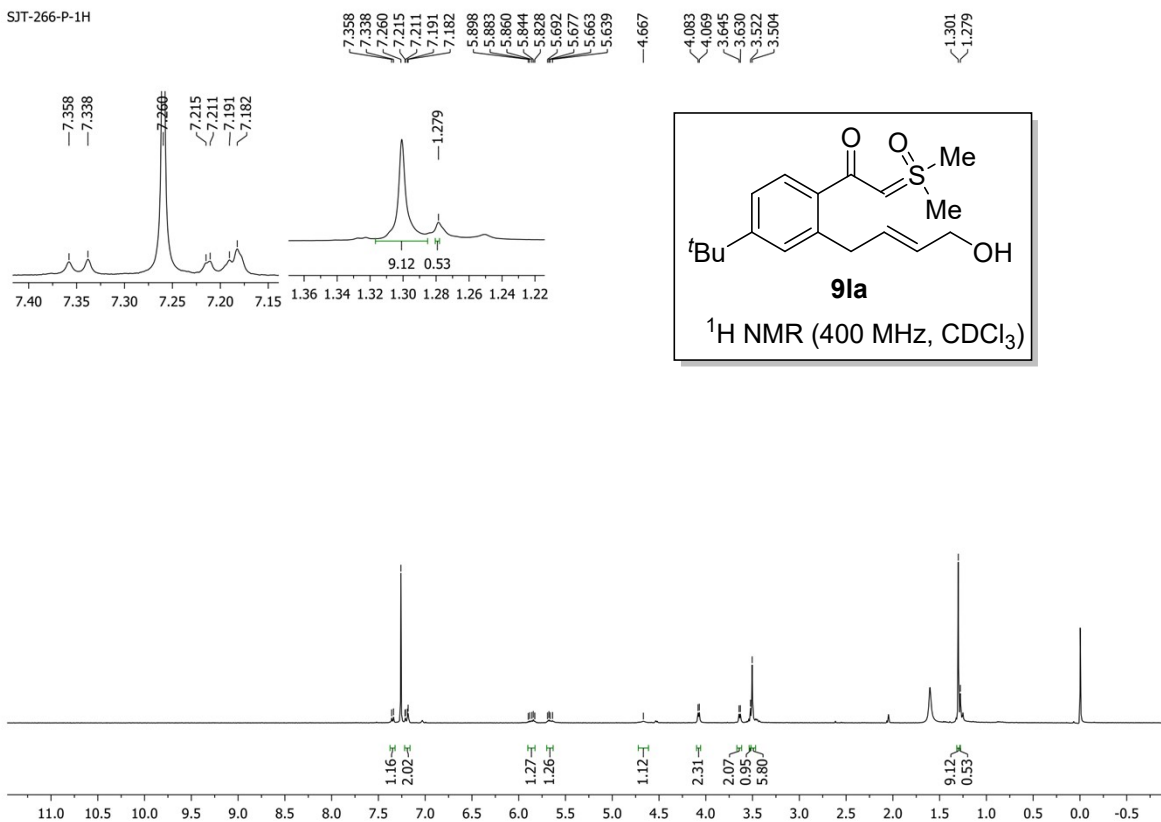



SJT-266-P-13C

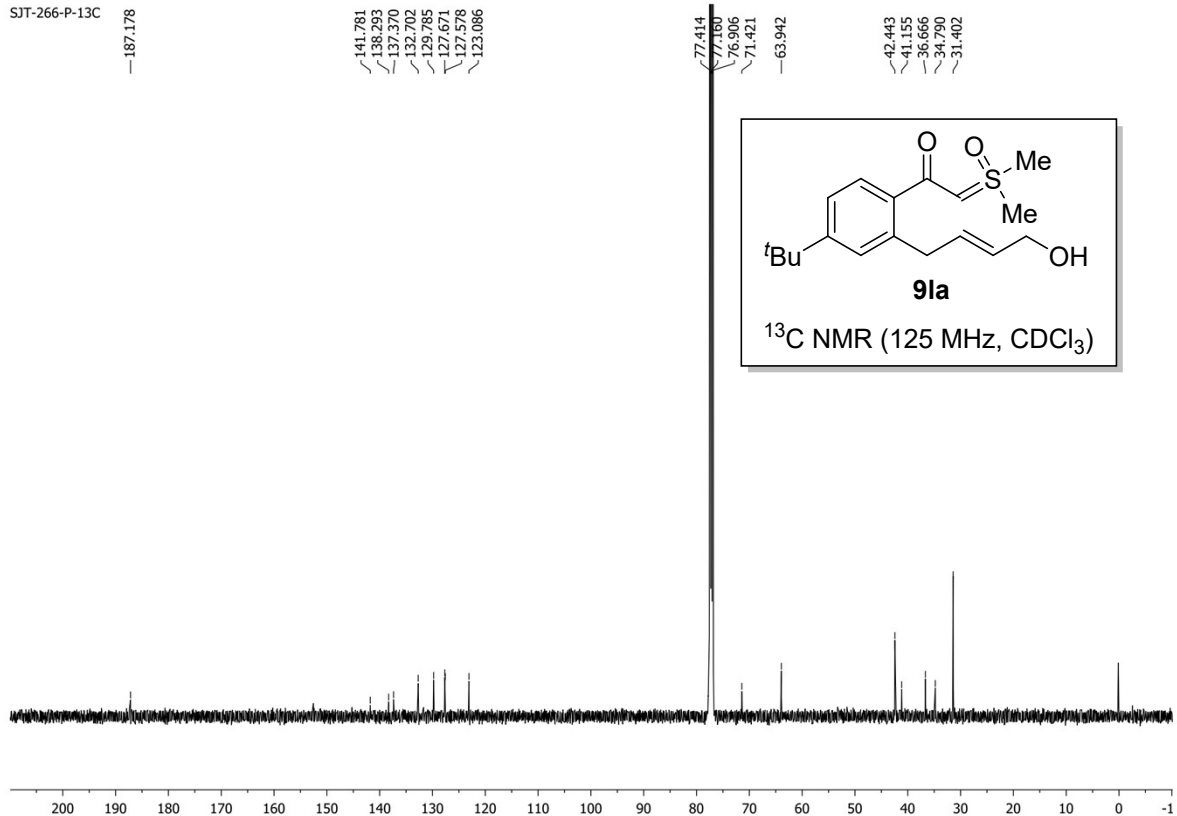

SJT-265-P-1H

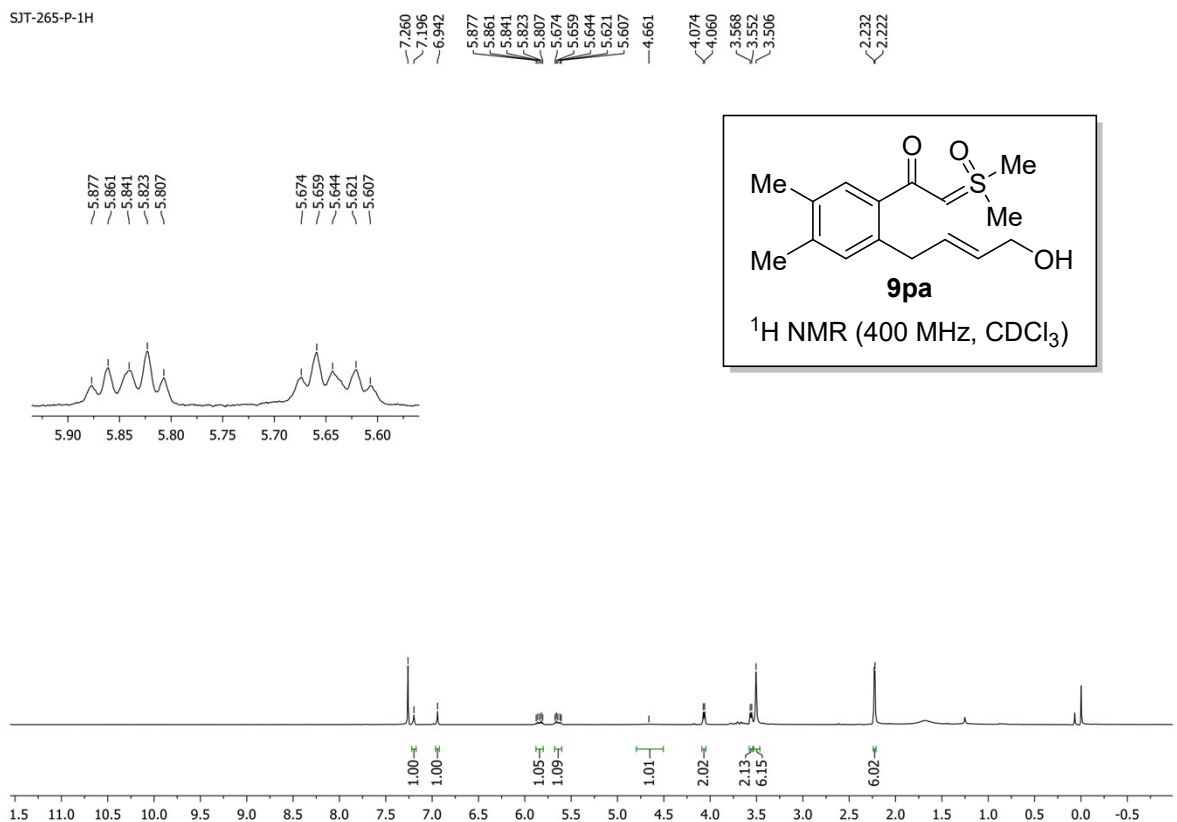

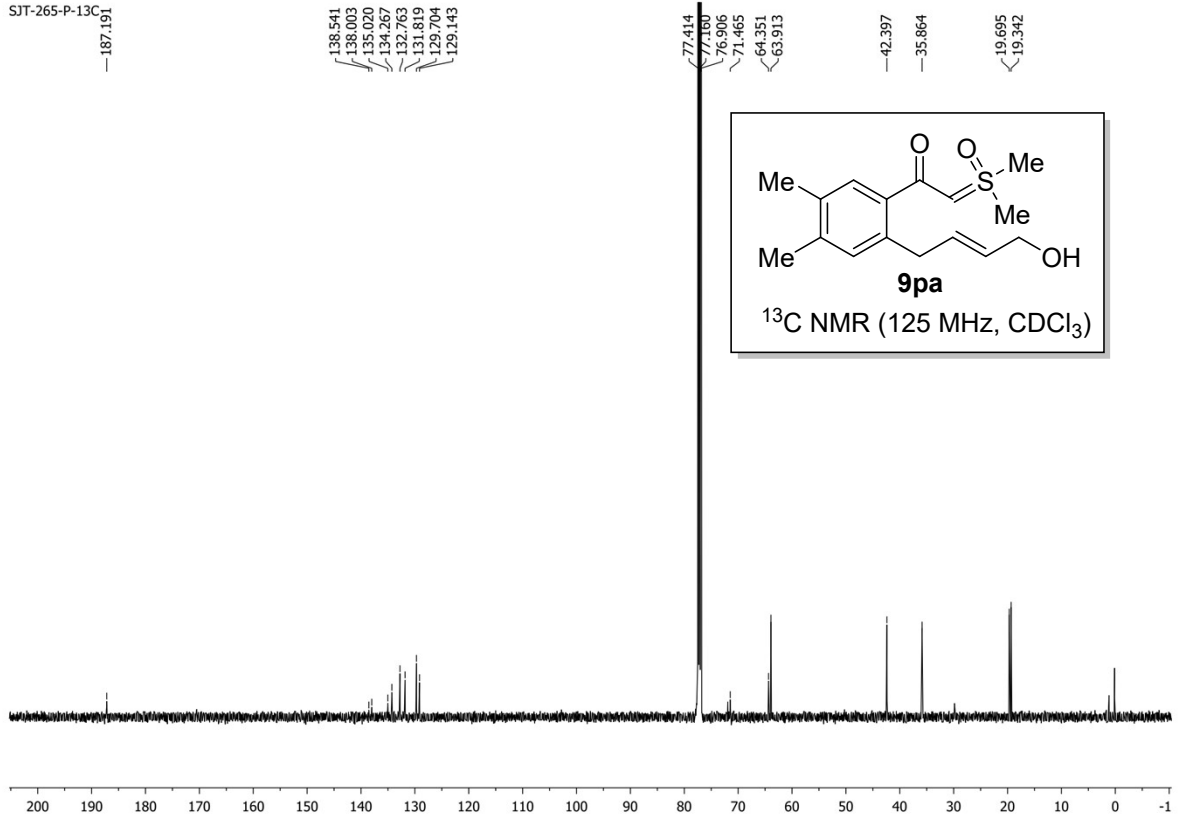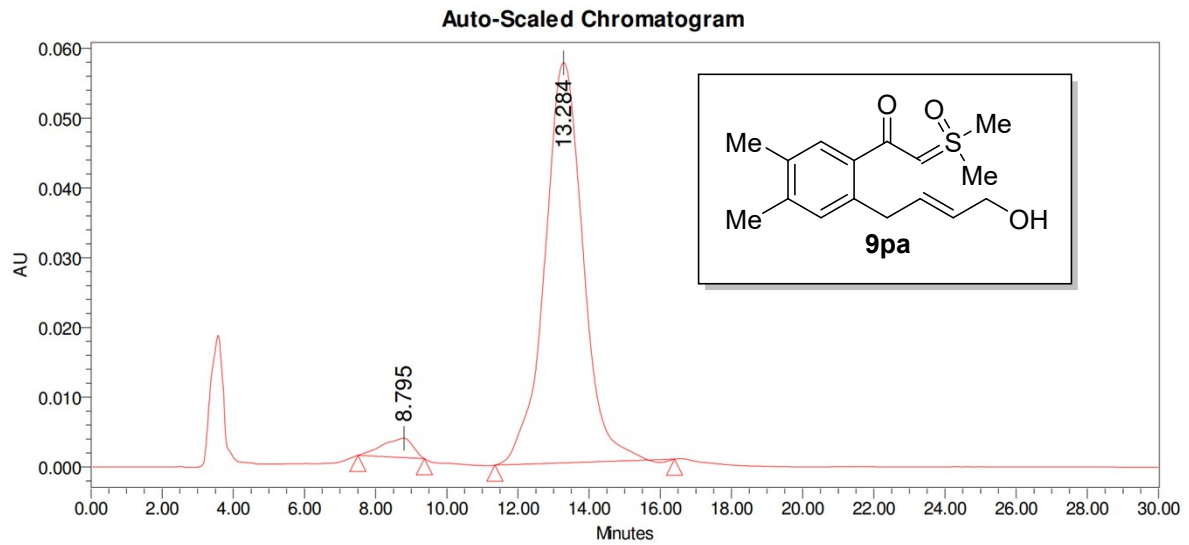

## Peak Results

|   | Start Time (min) | End Time (min) | RT     | Height ( $\mu\text{V}$ ) | % Area |
|---|------------------|----------------|--------|--------------------------|--------|
| 1 | 7.500            | 9.367          | 8.795  | 2777                     | 3.67   |
| 2 | 11.350           | 16.400         | 13.284 | 57356                    | 96.33  |

SJT-255-P-1H

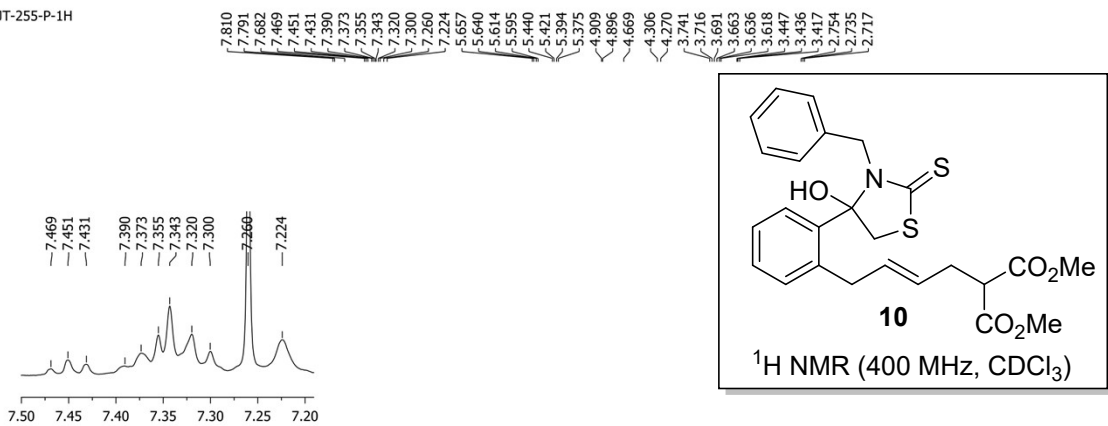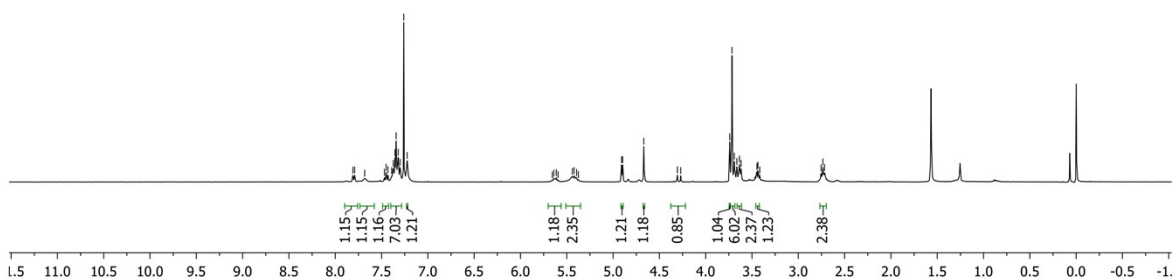

SJT-255-P-13C

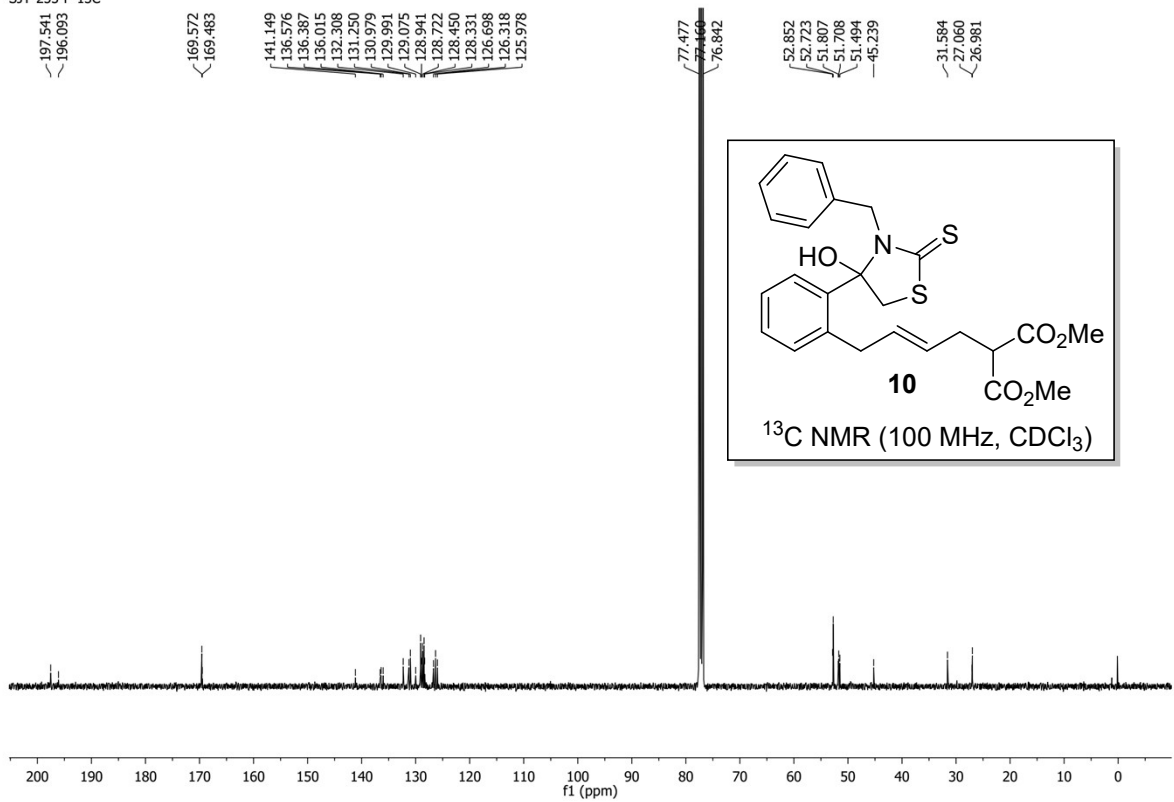

SJT-243-E-1H

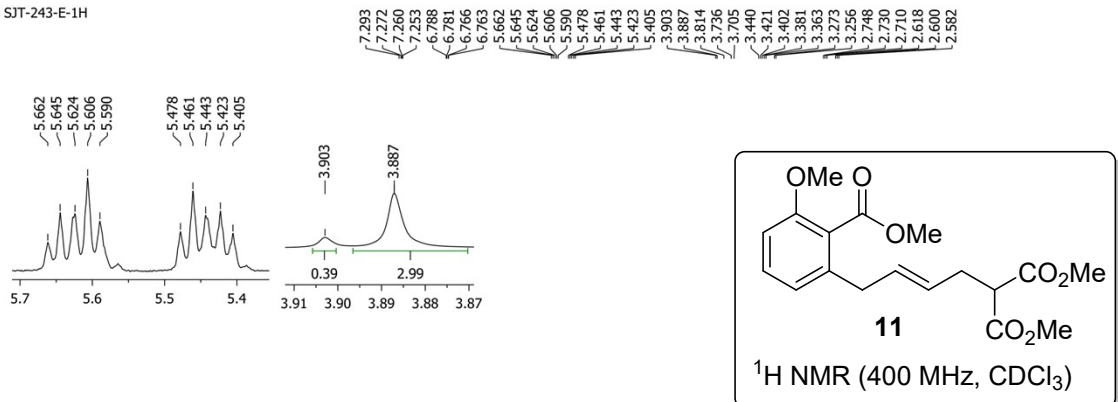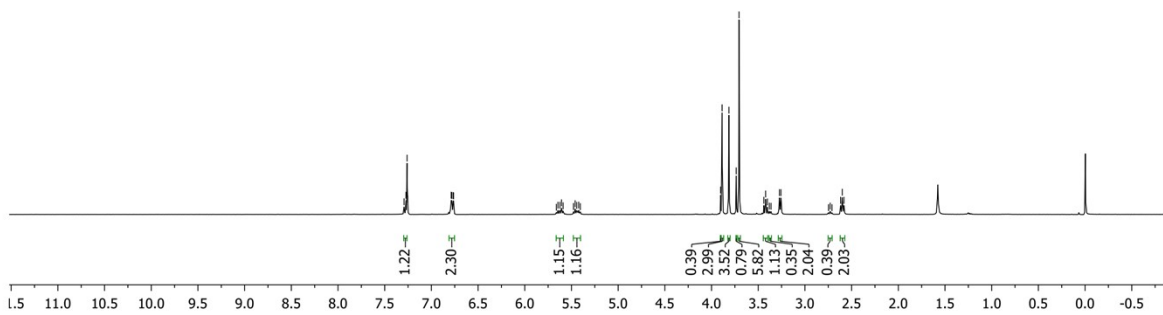

SJT-243-E-13C

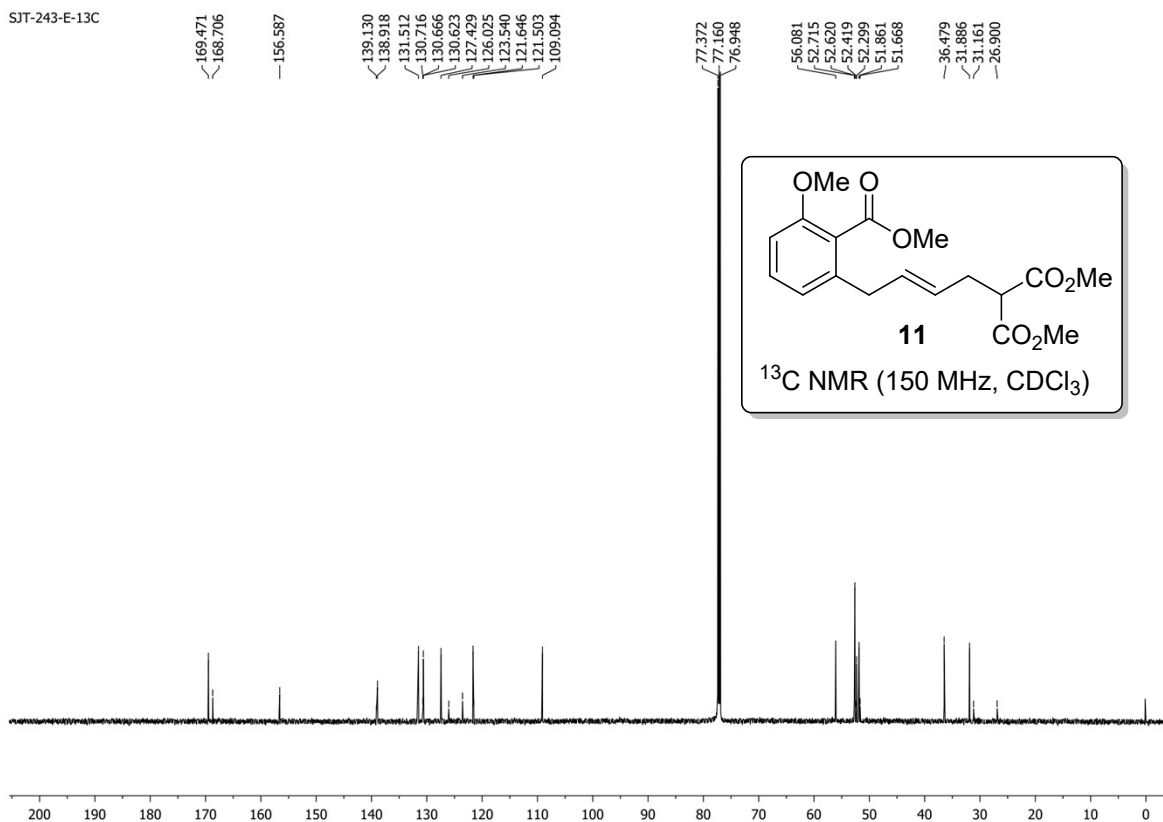

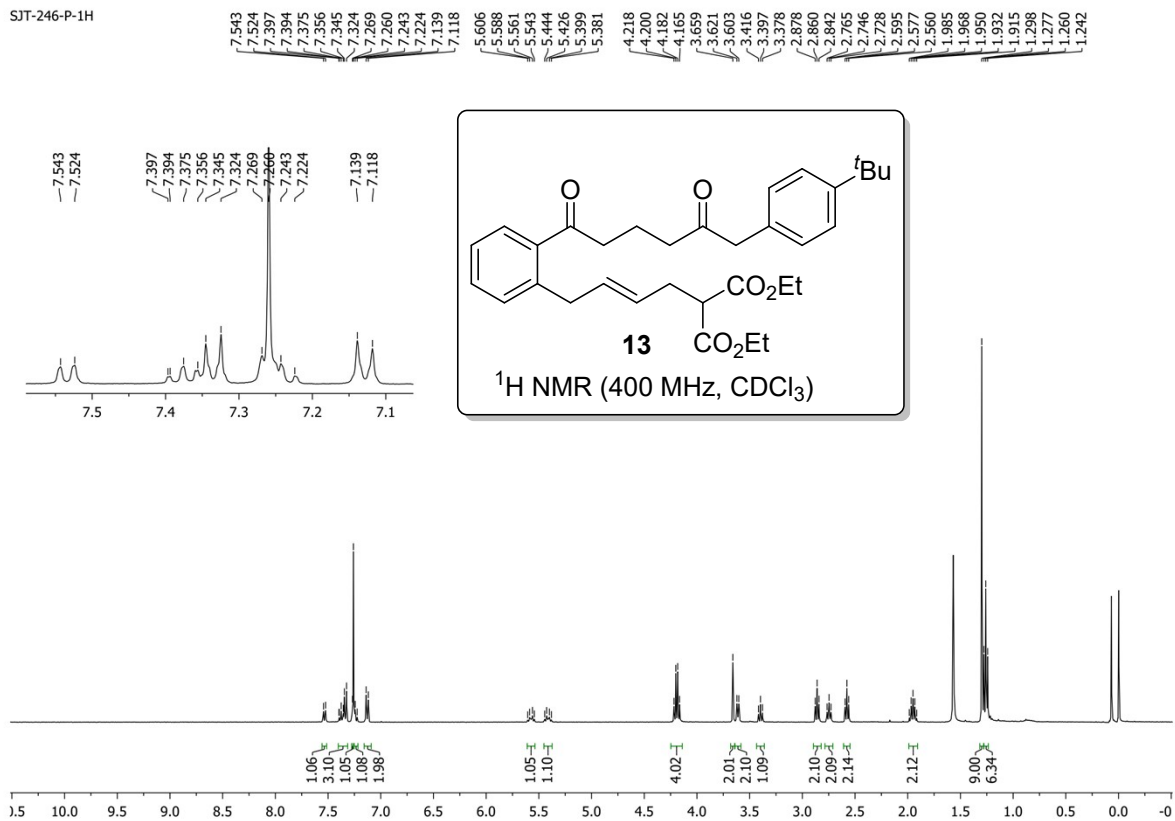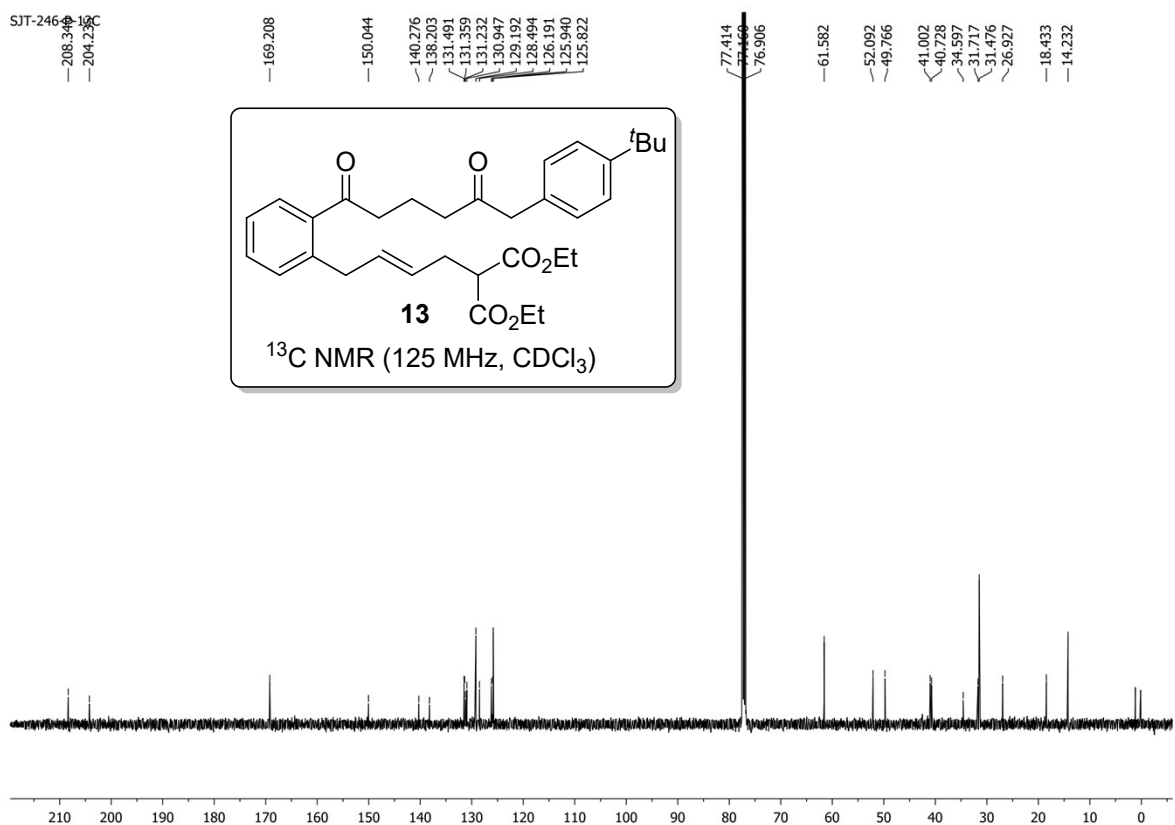

SJT-260-P-1H

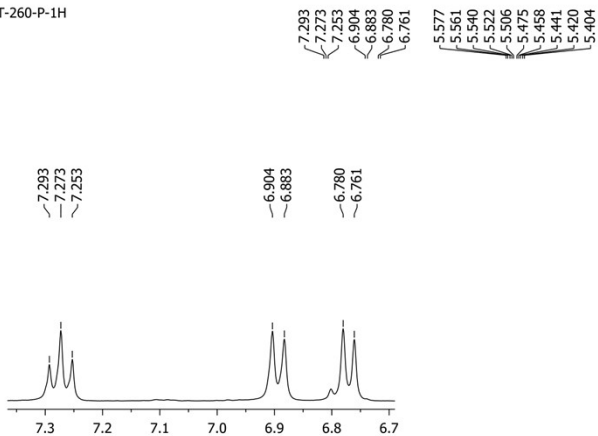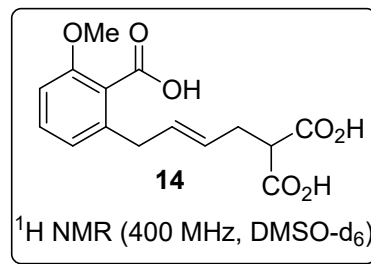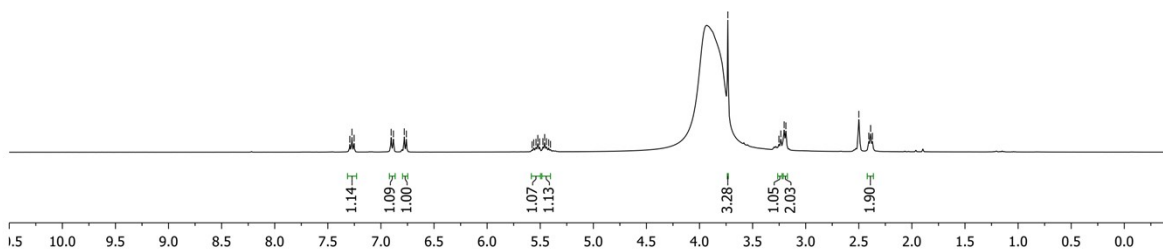

SJT-260-P-13C

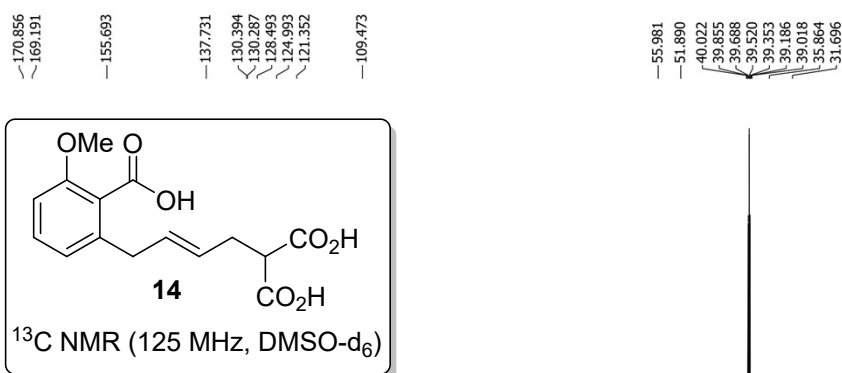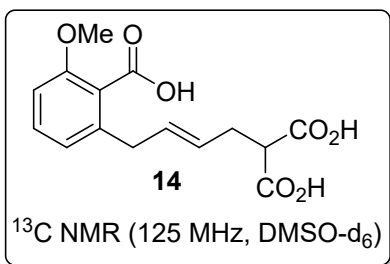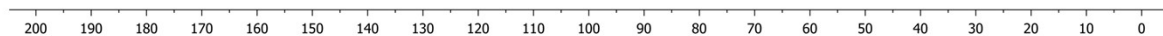

SJT-338-P-1H

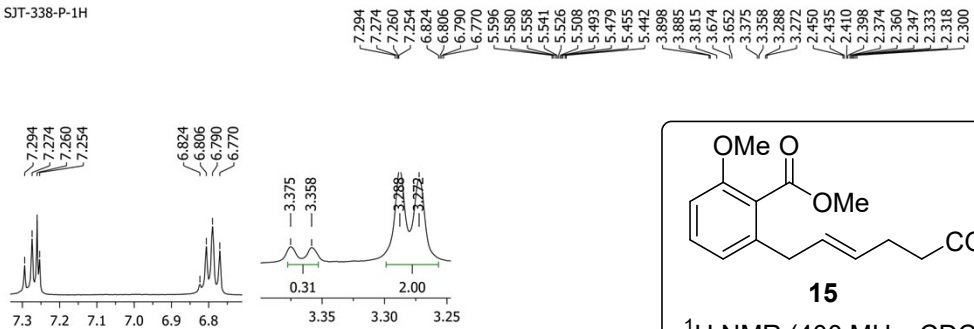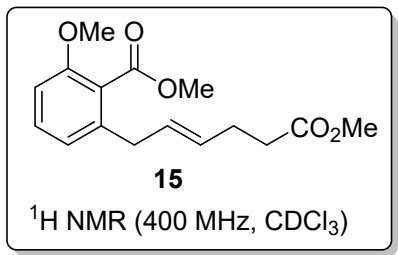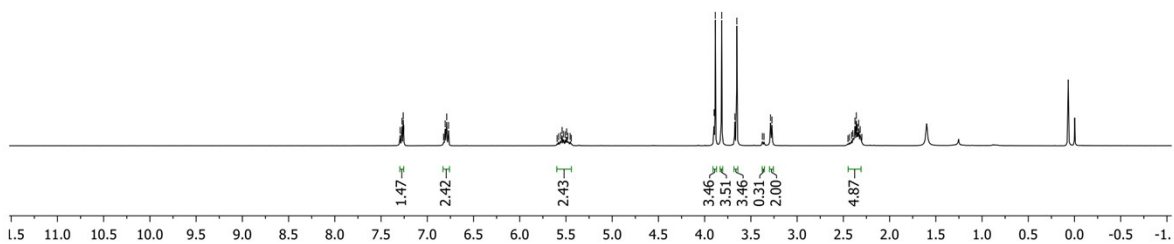

SJT-338-P-13C

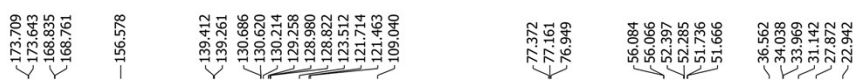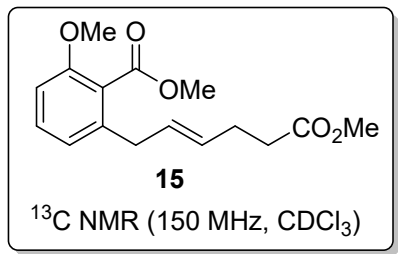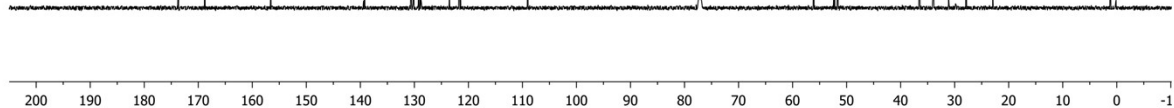

SJT-337-P-1H

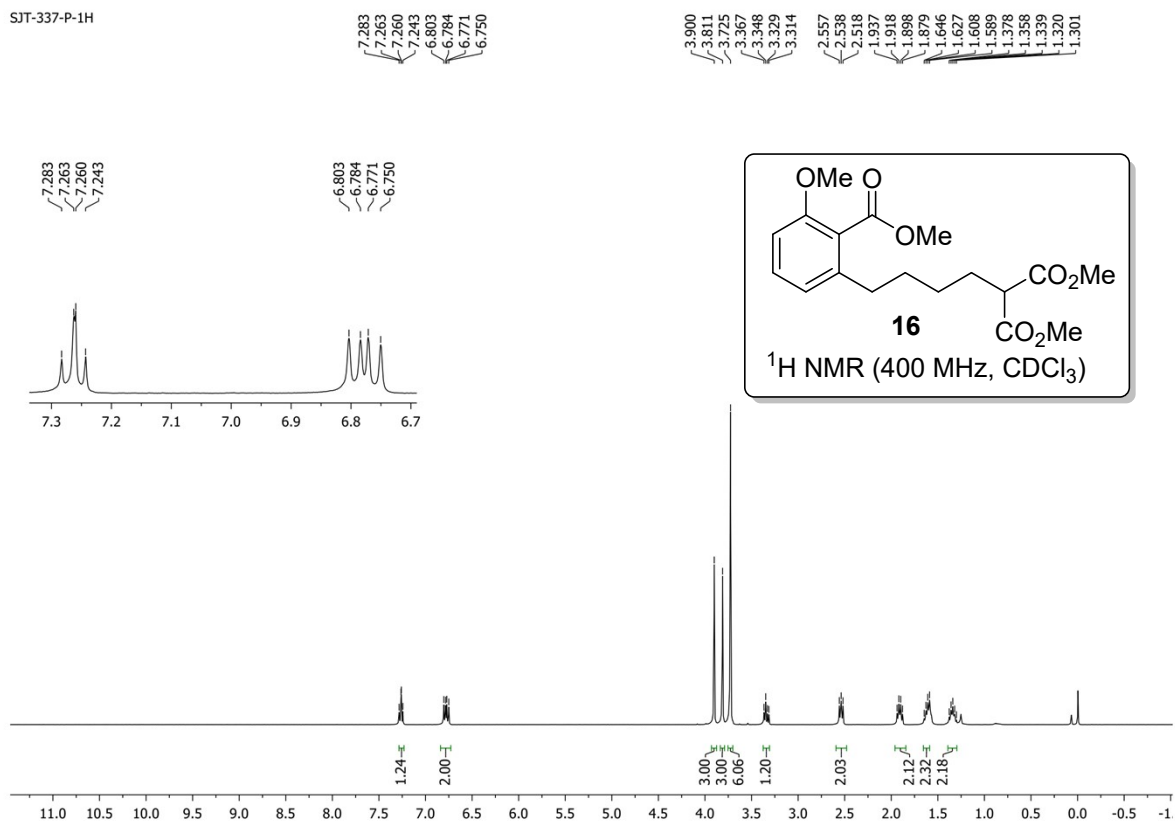

SJT-337-P-1H

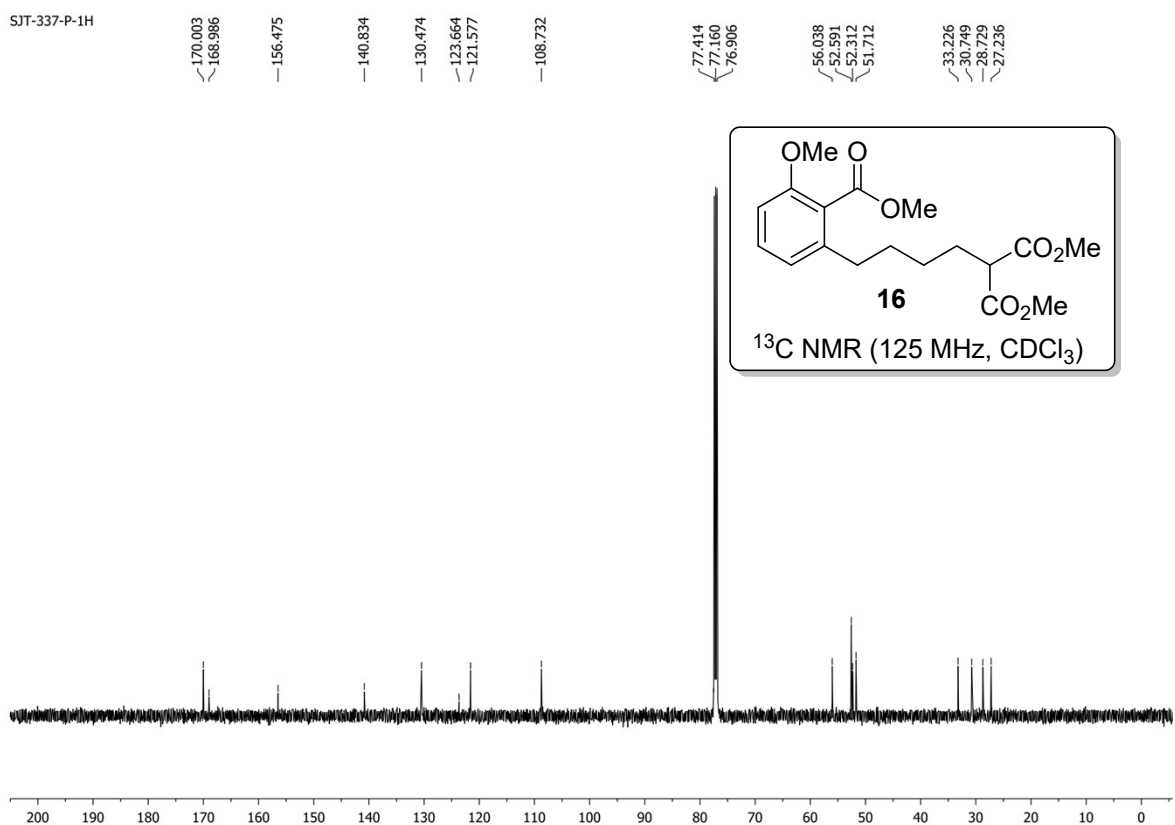



SJT-189-P-1H

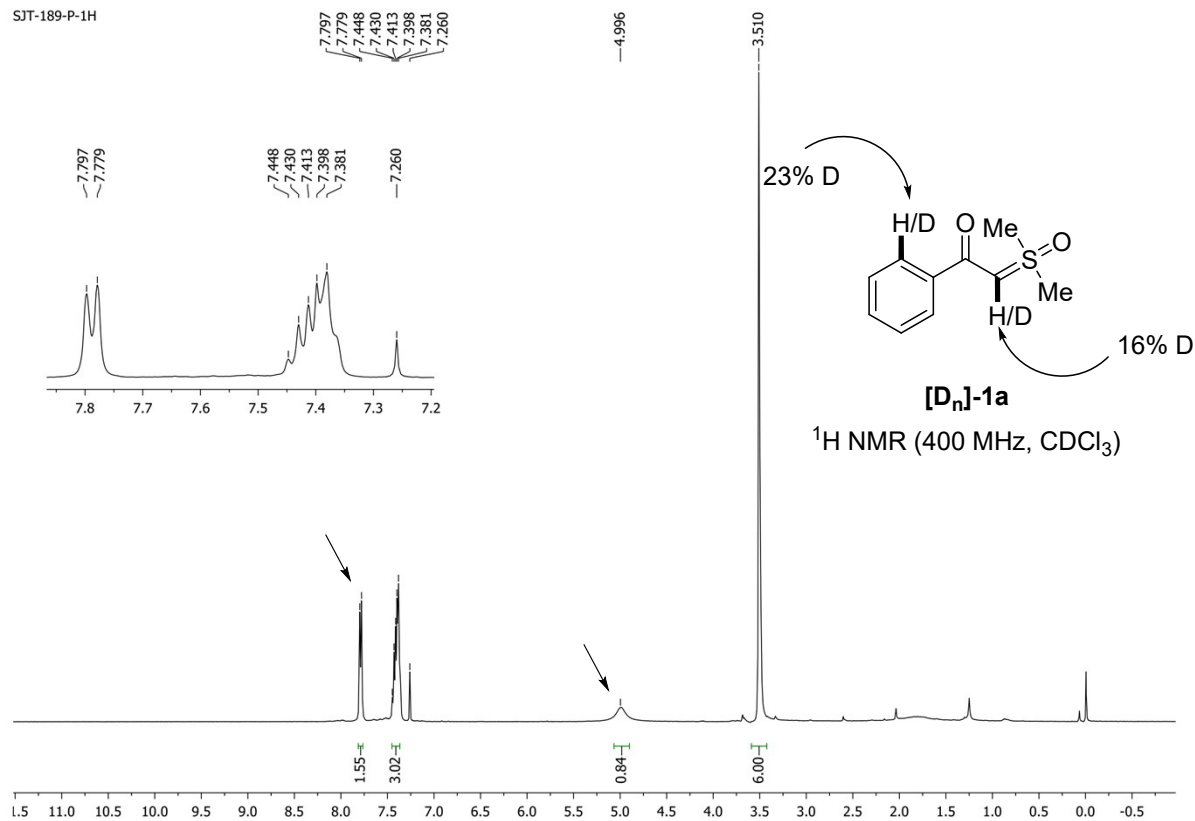

SJT-183-N-1H

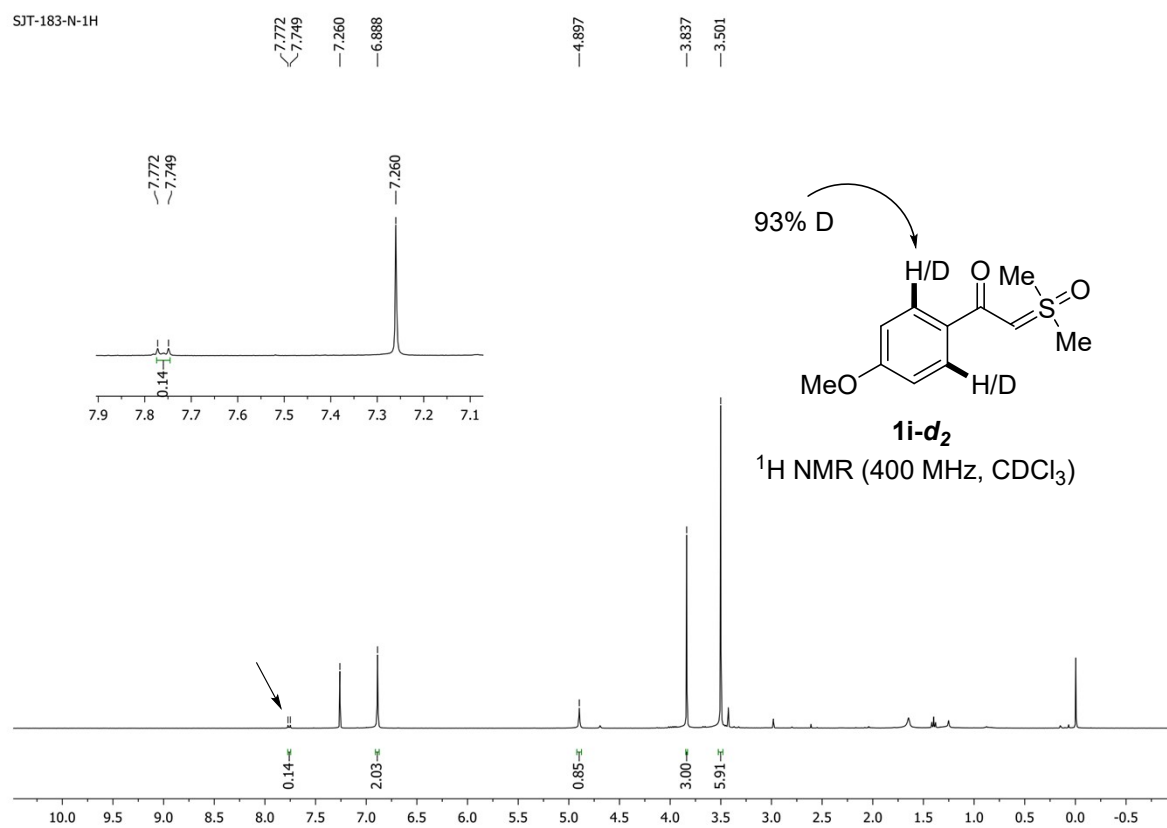

SJT-264-par-1H

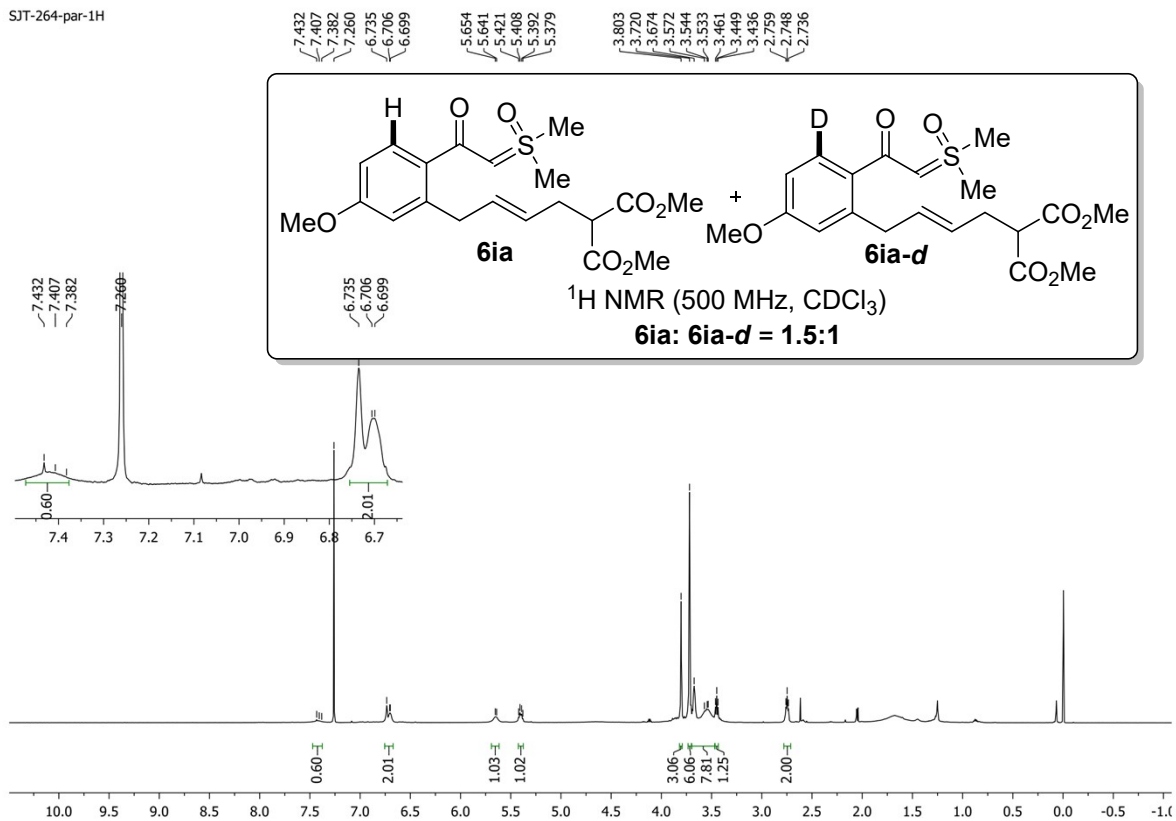

SJT-264-comp-1H

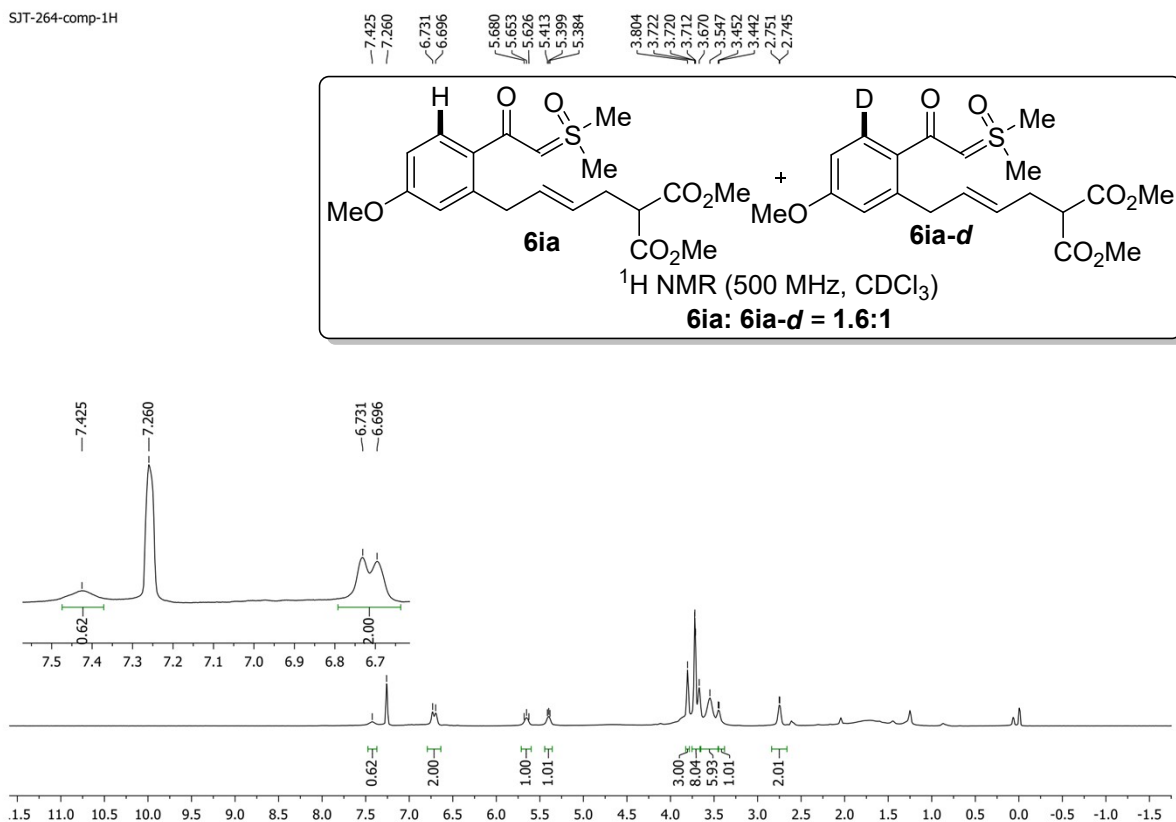

Supplement: d3cc04507b1.pdf [file d3cc04507b1.pdf]
